# Supplementary material for: Novel sources of variation in grain Zinc (Zn) concentration in bread wheat germplasm derived from Watkins landraces
Source: PubMed Central journal article supplement (PMC7048275; doi:10.1371/journal.pone.0229107), 2020-02-28
Supplement: pone.0229107.s001.pdf [file pone.0229107.s001.pdf]

**Supplementary Table 1.** Passport data of 245 wheat lines derived from Watkins landraces and

| <b>Sr No</b> | <b>Genotype</b> | <b>Watkin_accession_No</b> | <b>Watkin_Country_Origin</b> |
|--------------|-----------------|----------------------------|------------------------------|
| 1            | PxW7 - 2        | 1190007                    | Australia                    |
| 2            | PxW7 - 3        | 1190007                    | Australia                    |
| 3            | PxW7 - 15       | 1190007                    | Australia                    |
| 4            | PxW7 - 18       | 1190007                    | Australia                    |
| 5            | PxW7 - 29       | 1190007                    | Australia                    |
| 6            | PxW7 - 32       | 1190007                    | Australia                    |
| 7            | PxW7 - 47       | 1190007                    | Australia                    |
| 8            | PxW7 - 60       | 1190007                    | Australia                    |
| 9            | PxW7 - 71       | 1190007                    | Australia                    |
| 10           | PxW7 - 76       | 1190007                    | Australia                    |
| 11           | PxW7 - 77       | 1190007                    | Australia                    |
| 12           | PxW7 - 87       | 1190007                    | Australia                    |
| 13           | PxW32 - 8       | 1190032                    | India                        |
| 14           | PxW32 - 27      | 1190032                    | India                        |
| 15           | PxW32 - 29      | 1190032                    | India                        |
| 16           | PxW32 - 50      | 1190032                    | India                        |
| 17           | PxW32 - 56      | 1190032                    | India                        |
| 18           | PxW32 - 57      | 1190032                    | India                        |
| 19           | PxW32 - 60      | 1190032                    | India                        |
| 20           | PxW32 - 61      | 1190032                    | India                        |
| 21           | PxW32 - 62      | 1190032                    | India                        |
| 22           | PxW32 - 66      | 1190032                    | India                        |
| 23           | PxW32 - 76      | 1190032                    | India                        |
| 24           | PxW32 - 81      | 1190032                    | India                        |
| 25           | PxW42 - 14      | 1190042                    | France                       |
| 26           | PxW42 - 17      | 1190042                    | France                       |
| 27           | PxW42 - 18      | 1190042                    | France                       |
| 28           | PxW42 - 22      | 1190042                    | France                       |
| 29           | PxW42 - 33      | 1190042                    | France                       |
| 30           | PxW42 - 34      | 1190042                    | France                       |
| 31           | PxW42 - 45      | 1190042                    | France                       |
| 32           | PxW42 - 60      | 1190042                    | France                       |
| 33           | PxW42 - 68      | 1190042                    | France                       |
| 34           | PxW42 - 75      | 1190042                    | France                       |
| 35           | PxW42 - 90      | 1190042                    | France                       |
| 36           | PxW42 - 91      | 1190042                    | France                       |
| 37           | PxW42 - 93      | 1190042                    | France                       |
| 38           | PxW216 - 3      | 1190216                    | Morocco                      |
| 39           | PxW216 - 4      | 1190216                    | Morocco                      |
| 40           | PxW216 - 30     | 1190216                    | Morocco                      |
| 41           | PxW216 - 45     | 1190216                    | Morocco                      |
| 42           | PxW216 - 48     | 1190216                    | Morocco                      |
| 43           | PxW216 - 74     | 1190216                    | Morocco                      |
| 44           | PxW216 - 76     | 1190216                    | Morocco                      |
| 45           | PxW216 - 81     | 1190216                    | Morocco                      |
| 46           | PxW216 - 85     | 1190216                    | Morocco                      |
| 47           | PxW216 - 88     | 1190216                    | Morocco                      |
| 48           | PxW216 - 89     | 1190216                    | Morocco                      |

|    |             |         |                |
|----|-------------|---------|----------------|
| 49 | PxW216 - 92 | 1190216 | Morocco        |
| 50 | PxW216 - 94 | 1190216 | Morocco        |
| 51 | PxW223 - 1  | 1190223 | Burma          |
| 52 | PxW223 - 2  | 1190223 | Burma          |
| 53 | PxW223 - 3  | 1190223 | Burma          |
| 54 | PxW223 - 25 | 1190223 | Burma          |
| 55 | PxW223 - 80 | 1190223 | Burma          |
| 56 | PxW223 - 83 | 1190223 | Burma          |
| 57 | PxW223 - 85 | 1190223 | Burma          |
| 58 | PxW223 - 86 | 1190223 | Burma          |
| 59 | PxW223 - 89 | 1190223 | Burma          |
| 60 | PxW223 - 90 | 1190223 | Burma          |
| 61 | PxW223 - 91 | 1190223 | Burma          |
| 62 | PxW223 - 92 | 1190223 | Burma          |
| 63 | PxW223 - 94 | 1190223 | Burma          |
| 64 | PxW254 - 2  | 1190254 | Morocco        |
| 65 | PxW254 - 3  | 1190254 | Morocco        |
| 66 | PxW254 - 24 | 1190254 | Morocco        |
| 67 | PxW254 - 39 | 1190254 | Morocco        |
| 68 | PxW254 - 40 | 1190254 | Morocco        |
| 69 | PxW254 - 52 | 1190254 | Morocco        |
| 70 | PxW254 - 55 | 1190254 | Morocco        |
| 71 | PxW254 - 59 | 1190254 | Morocco        |
| 72 | PxW254 - 69 | 1190254 | Morocco        |
| 73 | PxW254 - 74 | 1190254 | Morocco        |
| 74 | PxW254 - 76 | 1190254 | Morocco        |
| 75 | PxW254 - 84 | 1190254 | Morocco        |
| 76 | PxW254 - 87 | 1190254 | Morocco        |
| 77 | PxW264 - 9  | 1190264 | Canary Islands |
| 78 | PxW264 - 10 | 1190264 | Canary Islands |
| 79 | PxW264 - 12 | 1190264 | Canary Islands |
| 80 | PxW264 - 16 | 1190264 | Canary Islands |
| 81 | PxW264 - 17 | 1190264 | Canary Islands |
| 82 | PxW264 - 31 | 1190264 | Canary Islands |
| 83 | PxW264 - 33 | 1190264 | Canary Islands |
| 84 | PxW264 - 41 | 1190264 | Canary Islands |
| 85 | PxW264 - 47 | 1190264 | Canary Islands |
| 86 | PxW264 - 50 | 1190264 | Canary Islands |
| 87 | PxW264 - 51 | 1190264 | Canary Islands |
| 88 | PxW264 - 52 | 1190264 | Canary Islands |
| 89 | PxW264 - 86 | 1190264 | Canary Islands |
| 90 | PxW273 - 11 | 1190273 | Spain          |
| 91 | PxW273 - 15 | 1190273 | Spain          |
| 92 | PxW273 - 19 | 1190273 | Spain          |
| 93 | PxW273 - 21 | 1190273 | Spain          |
| 94 | PxW273 - 26 | 1190273 | Spain          |
| 95 | PxW273 - 35 | 1190273 | Spain          |
| 96 | PxW273 - 45 | 1190273 | Spain          |
| 97 | PxW273 - 52 | 1190273 | Spain          |
| 98 | PxW273 - 58 | 1190273 | Spain          |

|     |             |         |          |
|-----|-------------|---------|----------|
| 99  | PxW273 - 71 | 1190273 | Spain    |
| 100 | PxW273 - 79 | 1190273 | Spain    |
| 101 | PxW273 - 81 | 1190273 | Spain    |
| 102 | PxW273 - 87 | 1190273 | Spain    |
| 103 | PxW291 - 8  | 1190291 | Cyprus   |
| 104 | PxW291 - 12 | 1190291 | Cyprus   |
| 105 | PxW291 - 13 | 1190291 | Cyprus   |
| 106 | PxW291 - 23 | 1190291 | Cyprus   |
| 107 | PxW291 - 25 | 1190291 | Cyprus   |
| 108 | PxW291 - 35 | 1190291 | Cyprus   |
| 109 | PxW291 - 39 | 1190291 | Cyprus   |
| 110 | PxW291 - 45 | 1190291 | Cyprus   |
| 111 | PxW291 - 47 | 1190291 | Cyprus   |
| 112 | PxW291 - 50 | 1190291 | Cyprus   |
| 113 | PxW291 - 51 | 1190291 | Cyprus   |
| 114 | PxW291 - 74 | 1190291 | Cyprus   |
| 115 | PxW291 - 75 | 1190291 | Cyprus   |
| 116 | PxW299 - 14 | 1190299 | Turkey   |
| 117 | PxW299 - 17 | 1190299 | Turkey   |
| 118 | PxW299 - 20 | 1190299 | Turkey   |
| 119 | PxW299 - 31 | 1190299 | Turkey   |
| 120 | PxW299 - 34 | 1190299 | Turkey   |
| 121 | PxW299 - 40 | 1190299 | Turkey   |
| 122 | PxW299 - 47 | 1190299 | Turkey   |
| 123 | PxW299 - 51 | 1190299 | Turkey   |
| 124 | PxW299 - 63 | 1190299 | Turkey   |
| 125 | PxW299 - 68 | 1190299 | Turkey   |
| 126 | PxW299 - 69 | 1190299 | Turkey   |
| 127 | PxW299 - 78 | 1190299 | Turkey   |
| 128 | PxW299 - 87 | 1190299 | Turkey   |
| 129 | PxW349 - 7  | 1190349 | Bulgaria |
| 130 | PxW349 - 10 | 1190349 | Bulgaria |
| 131 | PxW349 - 16 | 1190349 | Bulgaria |
| 132 | PxW349 - 19 | 1190349 | Bulgaria |
| 133 | PxW349 - 22 | 1190349 | Bulgaria |
| 134 | PxW349 - 28 | 1190349 | Bulgaria |
| 135 | PxW349 - 31 | 1190349 | Bulgaria |
| 136 | PxW349 - 42 | 1190349 | Bulgaria |
| 137 | PxW349 - 46 | 1190349 | Bulgaria |
| 138 | PxW349 - 58 | 1190349 | Bulgaria |
| 139 | PxW349 - 65 | 1190349 | Bulgaria |
| 140 | PxW349 - 66 | 1190349 | Bulgaria |
| 141 | PxW349 - 72 | 1190349 | Bulgaria |
| 142 | PxW396 - 5  | 1190396 | Portugal |
| 143 | PxW396 - 12 | 1190396 | Portugal |
| 144 | PxW396 - 19 | 1190396 | Portugal |
| 145 | PxW396 - 30 | 1190396 | Portugal |
| 146 | PxW396 - 37 | 1190396 | Portugal |
| 147 | PxW396 - 46 | 1190396 | Portugal |
| 148 | PxW396 - 48 | 1190396 | Portugal |

|     |             |         |           |
|-----|-------------|---------|-----------|
| 149 | PxW396 - 49 | 1190396 | Portugal  |
| 150 | PxW396 - 51 | 1190396 | Portugal  |
| 151 | PxW396 - 56 | 1190396 | Portugal  |
| 152 | PxW396 - 60 | 1190396 | Portugal  |
| 153 | PxW396 - 62 | 1190396 | Portugal  |
| 154 | PxW396 - 73 | 1190396 | Portugal  |
| 155 | PxW397 - 20 | 1190397 | Portugal  |
| 156 | PxW397 - 26 | 1190397 | Portugal  |
| 157 | PxW397 - 33 | 1190397 | Portugal  |
| 158 | PxW397 - 48 | 1190397 | Portugal  |
| 159 | PxW397 - 50 | 1190397 | Portugal  |
| 160 | PxW397 - 51 | 1190397 | Portugal  |
| 161 | PxW397 - 61 | 1190397 | Portugal  |
| 162 | PxW397 - 76 | 1190397 | Portugal  |
| 163 | PxW397 - 80 | 1190397 | Portugal  |
| 164 | PxW397 - 82 | 1190397 | Portugal  |
| 165 | PxW397 - 83 | 1190397 | Portugal  |
| 166 | PxW397 - 88 | 1190397 | Portugal  |
| 167 | PxW397 - 89 | 1190397 | Portugal  |
| 168 | PxW398 - 18 | 1190398 | Palestine |
| 169 | PxW398 - 21 | 1190398 | Palestine |
| 170 | PxW398 - 41 | 1190398 | Palestine |
| 171 | PxW398 - 42 | 1190398 | Palestine |
| 172 | PxW398 - 44 | 1190398 | Palestine |
| 173 | PxW398 - 49 | 1190398 | Palestine |
| 174 | PxW398 - 55 | 1190398 | Palestine |
| 175 | PxW398 - 56 | 1190398 | Palestine |
| 176 | PxW398 - 60 | 1190398 | Palestine |
| 177 | PxW398 - 63 | 1190398 | Palestine |
| 178 | PxW398 - 74 | 1190398 | Palestine |
| 179 | PxW398 - 81 | 1190398 | Palestine |
| 180 | PxW398 - 85 | 1190398 | Palestine |
| 181 | PxW420 - 1  | 1190420 | India     |
| 182 | PxW420 - 3  | 1190420 | India     |
| 183 | PxW420 - 8  | 1190420 | India     |
| 184 | PxW420 - 10 | 1190420 | India     |
| 185 | PxW420 - 11 | 1190420 | India     |
| 186 | PxW420 - 21 | 1190420 | India     |
| 187 | PxW420 - 22 | 1190420 | India     |
| 188 | PxW420 - 25 | 1190420 | India     |
| 189 | PxW420 - 31 | 1190420 | India     |
| 190 | PxW420 - 32 | 1190420 | India     |
| 191 | PxW420 - 37 | 1190420 | India     |
| 192 | PxW420 - 67 | 1190420 | India     |
| 193 | PxW420 - 94 | 1190420 | India     |
| 194 | PxW546 - 3  | 1190546 | Spain     |
| 195 | PxW546 - 8  | 1190546 | Spain     |
| 196 | PxW546 - 12 | 1190546 | Spain     |
| 197 | PxW546 - 15 | 1190546 | Spain     |
| 198 | PxW546 - 16 | 1190546 | Spain     |

|     |             |         |         |
|-----|-------------|---------|---------|
| 199 | PxW546 - 20 | 1190546 | Spain   |
| 200 | PxW546 - 24 | 1190546 | Spain   |
| 201 | PxW546 - 25 | 1190546 | Spain   |
| 202 | PxW546 - 27 | 1190546 | Spain   |
| 203 | PxW546 - 29 | 1190546 | Spain   |
| 204 | PxW546 - 32 | 1190546 | Spain   |
| 205 | PxW546 - 38 | 1190546 | Spain   |
| 206 | PxW546 - 47 | 1190546 | Spain   |
| 207 | PxW566 - 7  | 1190566 | Greece  |
| 208 | PxW566 - 12 | 1190566 | Greece  |
| 209 | PxW566 - 14 | 1190566 | Greece  |
| 210 | PxW566 - 17 | 1190566 | Greece  |
| 211 | PxW566 - 20 | 1190566 | Greece  |
| 212 | PxW566 - 21 | 1190566 | Greece  |
| 213 | PxW566 - 23 | 1190566 | Greece  |
| 214 | PxW566 - 24 | 1190566 | Greece  |
| 215 | PxW566 - 35 | 1190566 | Greece  |
| 216 | PxW566 - 50 | 1190566 | Greece  |
| 217 | PxW566 - 52 | 1190566 | Greece  |
| 218 | PxW566 - 72 | 1190566 | Greece  |
| 219 | PxW566 - 92 | 1190566 | Greece  |
| 220 | PxW685 - 1  | 1190685 | Spain   |
| 221 | PxW685 - 6  | 1190685 | Spain   |
| 222 | PxW685 - 7  | 1190685 | Spain   |
| 223 | PxW685 - 9  | 1190685 | Spain   |
| 224 | PxW685 - 12 | 1190685 | Spain   |
| 225 | PxW685 - 16 | 1190685 | Spain   |
| 226 | PxW685 - 22 | 1190685 | Spain   |
| 227 | PxW685 - 36 | 1190685 | Spain   |
| 228 | PxW685 - 41 | 1190685 | Spain   |
| 229 | PxW685 - 44 | 1190685 | Spain   |
| 230 | PxW685 - 55 | 1190685 | Spain   |
| 231 | PxW685 - 80 | 1190685 | Spain   |
| 232 | PxW685 - 88 | 1190685 | Spain   |
| 233 | PxW811 - 10 | 1190811 | Tunisia |
| 234 | PxW811 - 26 | 1190811 | Tunisia |
| 235 | PxW811 - 28 | 1190811 | Tunisia |
| 236 | PxW811 - 30 | 1190811 | Tunisia |
| 237 | PxW811 - 42 | 1190811 | Tunisia |
| 238 | PxW811 - 50 | 1190811 | Tunisia |
| 239 | PxW811 - 56 | 1190811 | Tunisia |
| 240 | PxW811 - 59 | 1190811 | Tunisia |
| 241 | PxW811 - 60 | 1190811 | Tunisia |
| 242 | PxW811 - 83 | 1190811 | Tunisia |
| 243 | PxW811 - 84 | 1190811 | Tunisia |
| 244 | PxW811 - 90 | 1190811 | Tunisia |
| 245 | PxW811 - 96 | 1190811 | Tunisia |

id a wheat cultivar "Paragon"
