# Supplementary material for: Novel sources of variation in grain Zinc (Zn) concentration in bread wheat germplasm derived from Watkins landraces
Source: PubMed Central journal article supplement (PMC7048275; doi:10.1371/journal.pone.0229107), 2020-02-28
Supplement: pone.0229107.s002.pdf [file pone.0229107.s002.pdf]

Supplementary Table 2. Primary data of 245 Watkins and Paragon derived wheat lines for grain Zn, Fe, GYD, TGW and grain protein content, grown at Nottingham ar

| <b>Sr No!</b> | <b>Plot No!</b> | <b>Replication!</b> | <b>Treat!</b> | <b>Genotype!</b> | <b>Watkin_accession_No!</b> | <b>Watkin_Country_Origin!</b> | <b>Site!</b> |
|---------------|-----------------|---------------------|---------------|------------------|-----------------------------|-------------------------------|--------------|
| 247           | 247             | 3                   | 115 PxW7 - 2  |                  | 1190007                     | Australia                     | UoN          |
| 684           | 684             | 2                   | 115 PxW7 - 2  |                  | 1190007                     | Australia                     | UoN          |
| 1013          | 1013            | 1                   | 115 PxW7 - 2  |                  | 1190007                     | Australia                     | UoN          |
| 5             | 5               | 3                   | 116 PxW7 - 3  |                  | 1190007                     | Australia                     | UoN          |
| 544           | 544             | 1                   | 116 PxW7 - 3  |                  | 1190007                     | Australia                     | UoN          |
| 744           | 744             | 2                   | 116 PxW7 - 3  |                  | 1190007                     | Australia                     | UoN          |
| 241           | 241             | 3                   | 117 PxW7 - 15 |                  | 1190007                     | Australia                     | UoN          |
| 668           | 668             | 1                   | 117 PxW7 - 15 |                  | 1190007                     | Australia                     | UoN          |
| 1042          | 1042            | 2                   | 117 PxW7 - 15 |                  | 1190007                     | Australia                     | UoN          |
| 115           | 115             | 3                   | 118 PxW7 - 18 |                  | 1190007                     | Australia                     | UoN          |
| 647           | 647             | 1                   | 118 PxW7 - 18 |                  | 1190007                     | Australia                     | UoN          |
| 818           | 818             | 2                   | 118 PxW7 - 18 |                  | 1190007                     | Australia                     | UoN          |
| 112           | 112             | 3                   | 119 PxW7 - 29 |                  | 1190007                     | Australia                     | UoN          |
| 460           | 460             | 2                   | 119 PxW7 - 29 |                  | 1190007                     | Australia                     | UoN          |
| 1017          | 1017            | 1                   | 119 PxW7 - 29 |                  | 1190007                     | Australia                     | UoN          |
| 708           | 708             | 3                   | 120 PxW7 - 32 |                  | 1190007                     | Australia                     | UoN          |
| 765           | 765             | 1                   | 120 PxW7 - 32 |                  | 1190007                     | Australia                     | UoN          |
| 1176          | 1176            | 2                   | 120 PxW7 - 32 |                  | 1190007                     | Australia                     | UoN          |
| 221           | 221             | 3                   | 121 PxW7 - 47 |                  | 1190007                     | Australia                     | UoN          |
| 537           | 537             | 1                   | 121 PxW7 - 47 |                  | 1190007                     | Australia                     | UoN          |
| 1105          | 1105            | 2                   | 121 PxW7 - 47 |                  | 1190007                     | Australia                     | UoN          |
| 225           | 225             | 3                   | 122 PxW7 - 60 |                  | 1190007                     | Australia                     | UoN          |
| 633           | 633             | 2                   | 122 PxW7 - 60 |                  | 1190007                     | Australia                     | UoN          |
| 915           | 915             | 1                   | 122 PxW7 - 60 |                  | 1190007                     | Australia                     | UoN          |
| 376           | 376             | 3                   | 123 PxW7 - 71 |                  | 1190007                     | Australia                     | UoN          |
| 432           | 432             | 1                   | 123 PxW7 - 71 |                  | 1190007                     | Australia                     | UoN          |
| 867           | 867             | 2                   | 123 PxW7 - 71 |                  | 1190007                     | Australia                     | UoN          |
| 425           | 425             | 1                   | 124 PxW7 - 76 |                  | 1190007                     | Australia                     | UoN          |
| 822           | 822             | 3                   | 124 PxW7 - 76 |                  | 1190007                     | Australia                     | UoN          |
| 869           | 869             | 2                   | 124 PxW7 - 76 |                  | 1190007                     | Australia                     | UoN          |
| 231           | 231             | 3                   | 125 PxW7 - 77 |                  | 1190007                     | Australia                     | UoN          |

|      |      |   |                |                   |     |
|------|------|---|----------------|-------------------|-----|
| 690  | 690  | 2 | 125 PxW7 - 77  | 1190007 Australia | UoN |
| 1152 | 1152 | 1 | 125 PxW7 - 77  | 1190007 Australia | UoN |
| 449  | 449  | 2 | 126 PxW7 - 87  | 1190007 Australia | UoN |
| 583  | 583  | 3 | 126 PxW7 - 87  | 1190007 Australia | UoN |
| 1003 | 1003 | 1 | 126 PxW7 - 87  | 1190007 Australia | UoN |
| 249  | 249  | 3 | 127 PxW32 - 8  | 1190032 India     | UoN |
| 863  | 863  | 2 | 127 PxW32 - 8  | 1190032 India     | UoN |
| 897  | 897  | 1 | 127 PxW32 - 8  | 1190032 India     | UoN |
| 101  | 101  | 3 | 128 PxW32 - 27 | 1190032 India     | UoN |
| 526  | 526  | 1 | 128 PxW32 - 27 | 1190032 India     | UoN |
| 880  | 880  | 2 | 128 PxW32 - 27 | 1190032 India     | UoN |
| 12   | 12   | 3 | 129 PxW32 - 29 | 1190032 India     | UoN |
| 548  | 548  | 1 | 129 PxW32 - 29 | 1190032 India     | UoN |
| 997  | 997  | 2 | 129 PxW32 - 29 | 1190032 India     | UoN |
| 407  | 407  | 1 | 130 PxW32 - 50 | 1190032 India     | UoN |
| 581  | 581  | 3 | 130 PxW32 - 50 | 1190032 India     | UoN |
| 923  | 923  | 2 | 130 PxW32 - 50 | 1190032 India     | UoN |
| 525  | 525  | 1 | 131 PxW32 - 56 | 1190032 India     | UoN |
| 692  | 692  | 2 | 131 PxW32 - 56 | 1190032 India     | UoN |
| 858  | 858  | 3 | 131 PxW32 - 56 | 1190032 India     | UoN |
| 19   | 19   | 3 | 132 PxW32 - 57 | 1190032 India     | UoN |
| 627  | 627  | 2 | 132 PxW32 - 57 | 1190032 India     | UoN |
| 642  | 642  | 1 | 132 PxW32 - 57 | 1190032 India     | UoN |
| 464  | 464  | 3 | 133 PxW32 - 60 | 1190032 India     | UoN |
| 533  | 533  | 1 | 133 PxW32 - 60 | 1190032 India     | UoN |
| 929  | 929  | 2 | 133 PxW32 - 60 | 1190032 India     | UoN |
| 392  | 392  | 2 | 134 PxW32 - 61 | 1190032 India     | UoN |
| 466  | 466  | 3 | 134 PxW32 - 61 | 1190032 India     | UoN |
| 523  | 523  | 1 | 134 PxW32 - 61 | 1190032 India     | UoN |
| 104  | 104  | 3 | 135 PxW32 - 62 | 1190032 India     | UoN |
| 756  | 756  | 2 | 135 PxW32 - 62 | 1190032 India     | UoN |
| 919  | 919  | 1 | 135 PxW32 - 62 | 1190032 India     | UoN |
| 255  | 255  | 3 | 136 PxW32 - 66 | 1190032 India     | UoN |

|      |      |   |                |                |     |
|------|------|---|----------------|----------------|-----|
| 799  | 799  | 1 | 136 PxW32 - 66 | 1190032 India  | UoN |
| 998  | 998  | 2 | 136 PxW32 - 66 | 1190032 India  | UoN |
| 117  | 117  | 3 | 137 PxW32 - 76 | 1190032 India  | UoN |
| 334  | 334  | 2 | 137 PxW32 - 76 | 1190032 India  | UoN |
| 552  | 552  | 1 | 137 PxW32 - 76 | 1190032 India  | UoN |
| 387  | 387  | 2 | 138 PxW32 - 81 | 1190032 India  | UoN |
| 405  | 405  | 1 | 138 PxW32 - 81 | 1190032 India  | UoN |
| 707  | 707  | 3 | 138 PxW32 - 81 | 1190032 India  | UoN |
| 480  | 480  | 3 | 139 PxW42 - 14 | 1190042 France | UoN |
| 1010 | 1010 | 1 | 139 PxW42 - 14 | 1190042 France | UoN |
| 1174 | 1174 | 2 | 139 PxW42 - 14 | 1190042 France | UoN |
| 107  | 107  | 3 | 140 PxW42 - 17 | 1190042 France | UoN |
| 427  | 427  | 1 | 140 PxW42 - 17 | 1190042 France | UoN |
| 926  | 926  | 2 | 140 PxW42 - 17 | 1190042 France | UoN |
| 234  | 234  | 3 | 141 PxW42 - 18 | 1190042 France | UoN |
| 866  | 866  | 2 | 141 PxW42 - 18 | 1190042 France | UoN |
| 1036 | 1036 | 1 | 141 PxW42 - 18 | 1190042 France | UoN |
| 484  | 484  | 3 | 142 PxW42 - 22 | 1190042 France | UoN |
| 539  | 539  | 1 | 142 PxW42 - 22 | 1190042 France | UoN |
| 874  | 874  | 2 | 142 PxW42 - 22 | 1190042 France | UoN |
| 398  | 398  | 2 | 143 PxW42 - 33 | 1190042 France | UoN |
| 592  | 592  | 3 | 143 PxW42 - 33 | 1190042 France | UoN |
| 1134 | 1134 | 1 | 143 PxW42 - 33 | 1190042 France | UoN |
| 462  | 462  | 3 | 144 PxW42 - 34 | 1190042 France | UoN |
| 1121 | 1121 | 1 | 144 PxW42 - 34 | 1190042 France | UoN |
| 1171 | 1171 | 2 | 144 PxW42 - 34 | 1190042 France | UoN |
| 472  | 472  | 3 | 145 PxW42 - 45 | 1190042 France | UoN |
| 546  | 546  | 1 | 145 PxW42 - 45 | 1190042 France | UoN |
| 1053 | 1053 | 2 | 145 PxW42 - 45 | 1190042 France | UoN |
| 124  | 124  | 3 | 146 PxW42 - 60 | 1190042 France | UoN |
| 901  | 901  | 1 | 146 PxW42 - 60 | 1190042 France | UoN |
| 1161 | 1161 | 2 | 146 PxW42 - 60 | 1190042 France | UoN |
| 423  | 423  | 1 | 147 PxW42 - 68 | 1190042 France | UoN |

|      |      |   |                 |                 |     |
|------|------|---|-----------------|-----------------|-----|
| 609  | 609  | 3 | 147 PxW42 - 68  | 1190042 France  | UoN |
| 1059 | 1059 | 2 | 147 PxW42 - 68  | 1190042 France  | UoN |
| 120  | 120  | 3 | 148 PxW42 - 75  | 1190042 France  | UoN |
| 670  | 670  | 1 | 148 PxW42 - 75  | 1190042 France  | UoN |
| 689  | 689  | 2 | 148 PxW42 - 75  | 1190042 France  | UoN |
| 122  | 122  | 3 | 149 PxW42 - 90  | 1190042 France  | UoN |
| 515  | 515  | 2 | 149 PxW42 - 90  | 1190042 France  | UoN |
| 1032 | 1032 | 1 | 149 PxW42 - 90  | 1190042 France  | UoN |
| 498  | 498  | 3 | 150 PxW42 - 91  | 1190042 France  | UoN |
| 504  | 504  | 2 | 150 PxW42 - 91  | 1190042 France  | UoN |
| 781  | 781  | 1 | 150 PxW42 - 91  | 1190042 France  | UoN |
| 13   | 13   | 3 | 151 PxW42 - 93  | 1190042 France  | UoN |
| 576  | 576  | 2 | 151 PxW42 - 93  | 1190042 France  | UoN |
| 658  | 658  | 1 | 151 PxW42 - 93  | 1190042 France  | UoN |
| 379  | 379  | 3 | 152 PxW216 - 3  | 1190216 Morocco | UoN |
| 982  | 982  | 2 | 152 PxW216 - 3  | 1190216 Morocco | UoN |
| 1020 | 1020 | 1 | 152 PxW216 - 3  | 1190216 Morocco | UoN |
| 377  | 377  | 3 | 153 PxW216 - 4  | 1190216 Morocco | UoN |
| 446  | 446  | 2 | 153 PxW216 - 4  | 1190216 Morocco | UoN |
| 917  | 917  | 1 | 153 PxW216 - 4  | 1190216 Morocco | UoN |
| 304  | 304  | 1 | 154 PxW216 - 30 | 1190216 Morocco | UoN |
| 691  | 691  | 2 | 154 PxW216 - 30 | 1190216 Morocco | UoN |
| 832  | 832  | 3 | 154 PxW216 - 30 | 1190216 Morocco | UoN |
| 440  | 440  | 1 | 155 PxW216 - 45 | 1190216 Morocco | UoN |
| 451  | 451  | 2 | 155 PxW216 - 45 | 1190216 Morocco | UoN |
| 729  | 729  | 3 | 155 PxW216 - 45 | 1190216 Morocco | UoN |
| 589  | 589  | 3 | 156 PxW216 - 48 | 1190216 Morocco | UoN |
| 648  | 648  | 1 | 156 PxW216 - 48 | 1190216 Morocco | UoN |
| 1060 | 1060 | 2 | 156 PxW216 - 48 | 1190216 Morocco | UoN |
| 243  | 243  | 3 | 157 PxW216 - 74 | 1190216 Morocco | UoN |
| 764  | 764  | 1 | 157 PxW216 - 74 | 1190216 Morocco | UoN |
| 1050 | 1050 | 2 | 157 PxW216 - 74 | 1190216 Morocco | UoN |
| 728  | 728  | 3 | 158 PxW216 - 76 | 1190216 Morocco | UoN |

|      |      |   |                 |                 |     |
|------|------|---|-----------------|-----------------|-----|
| 748  | 748  | 2 | 158 PxW216 - 76 | 1190216 Morocco | UoN |
| 1040 | 1040 | 1 | 158 PxW216 - 76 | 1190216 Morocco | UoN |
| 227  | 227  | 3 | 159 PxW216 - 81 | 1190216 Morocco | UoN |
| 775  | 775  | 1 | 159 PxW216 - 81 | 1190216 Morocco | UoN |
| 925  | 925  | 2 | 159 PxW216 - 81 | 1190216 Morocco | UoN |
| 371  | 371  | 3 | 160 PxW216 - 85 | 1190216 Morocco | UoN |
| 791  | 791  | 1 | 160 PxW216 - 85 | 1190216 Morocco | UoN |
| 1179 | 1179 | 2 | 160 PxW216 - 85 | 1190216 Morocco | UoN |
| 402  | 402  | 1 | 161 PxW216 - 88 | 1190216 Morocco | UoN |
| 754  | 754  | 2 | 161 PxW216 - 88 | 1190216 Morocco | UoN |
| 843  | 843  | 3 | 161 PxW216 - 88 | 1190216 Morocco | UoN |
| 252  | 252  | 3 | 162 PxW216 - 89 | 1190216 Morocco | UoN |
| 542  | 542  | 1 | 162 PxW216 - 89 | 1190216 Morocco | UoN |
| 1168 | 1168 | 2 | 162 PxW216 - 89 | 1190216 Morocco | UoN |
| 108  | 108  | 3 | 163 PxW216 - 92 | 1190216 Morocco | UoN |
| 773  | 773  | 1 | 163 PxW216 - 92 | 1190216 Morocco | UoN |
| 817  | 817  | 2 | 163 PxW216 - 92 | 1190216 Morocco | UoN |
| 245  | 245  | 3 | 164 PxW216 - 94 | 1190216 Morocco | UoN |
| 646  | 646  | 1 | 164 PxW216 - 94 | 1190216 Morocco | UoN |
| 1108 | 1108 | 2 | 164 PxW216 - 94 | 1190216 Morocco | UoN |
| 132  | 132  | 3 | 165 PxW223 - 1  | 1190223 Burma   | UoN |
| 699  | 699  | 2 | 165 PxW223 - 1  | 1190223 Burma   | UoN |
| 766  | 766  | 1 | 165 PxW223 - 1  | 1190223 Burma   | UoN |
| 796  | 796  | 1 | 166 PxW223 - 2  | 1190223 Burma   | UoN |
| 838  | 838  | 3 | 166 PxW223 - 2  | 1190223 Burma   | UoN |
| 1167 | 1167 | 2 | 166 PxW223 - 2  | 1190223 Burma   | UoN |
| 410  | 410  | 1 | 167 PxW223 - 3  | 1190223 Burma   | UoN |
| 597  | 597  | 3 | 167 PxW223 - 3  | 1190223 Burma   | UoN |
| 983  | 983  | 2 | 167 PxW223 - 3  | 1190223 Burma   | UoN |
| 332  | 332  | 2 | 168 PxW223 - 25 | 1190223 Burma   | UoN |
| 474  | 474  | 3 | 168 PxW223 - 25 | 1190223 Burma   | UoN |
| 913  | 913  | 1 | 168 PxW223 - 25 | 1190223 Burma   | UoN |
| 411  | 411  | 1 | 169 PxW223 - 80 | 1190223 Burma   | UoN |

|      |      |   |                 |                 |     |
|------|------|---|-----------------|-----------------|-----|
| 562  | 562  | 2 | 169 PxW223 - 80 | 1190223 Burma   | UoN |
| 727  | 727  | 3 | 169 PxW223 - 80 | 1190223 Burma   | UoN |
| 381  | 381  | 2 | 170 PxW223 - 83 | 1190223 Burma   | UoN |
| 478  | 478  | 3 | 170 PxW223 - 83 | 1190223 Burma   | UoN |
| 798  | 798  | 1 | 170 PxW223 - 83 | 1190223 Burma   | UoN |
| 314  | 314  | 1 | 171 PxW223 - 85 | 1190223 Burma   | UoN |
| 620  | 620  | 3 | 171 PxW223 - 85 | 1190223 Burma   | UoN |
| 1175 | 1175 | 2 | 171 PxW223 - 85 | 1190223 Burma   | UoN |
| 312  | 312  | 1 | 172 PxW223 - 86 | 1190223 Burma   | UoN |
| 626  | 626  | 2 | 172 PxW223 - 86 | 1190223 Burma   | UoN |
| 739  | 739  | 3 | 172 PxW223 - 86 | 1190223 Burma   | UoN |
| 362  | 362  | 3 | 173 PxW223 - 89 | 1190223 Burma   | UoN |
| 760  | 760  | 2 | 173 PxW223 - 89 | 1190223 Burma   | UoN |
| 1130 | 1130 | 1 | 173 PxW223 - 89 | 1190223 Burma   | UoN |
| 125  | 125  | 3 | 174 PxW223 - 90 | 1190223 Burma   | UoN |
| 400  | 400  | 2 | 174 PxW223 - 90 | 1190223 Burma   | UoN |
| 651  | 651  | 1 | 174 PxW223 - 90 | 1190223 Burma   | UoN |
| 348  | 348  | 3 | 175 PxW223 - 91 | 1190223 Burma   | UoN |
| 669  | 669  | 1 | 175 PxW223 - 91 | 1190223 Burma   | UoN |
| 1163 | 1163 | 2 | 175 PxW223 - 91 | 1190223 Burma   | UoN |
| 375  | 375  | 3 | 176 PxW223 - 92 | 1190223 Burma   | UoN |
| 899  | 899  | 1 | 176 PxW223 - 92 | 1190223 Burma   | UoN |
| 1177 | 1177 | 2 | 176 PxW223 - 92 | 1190223 Burma   | UoN |
| 250  | 250  | 3 | 177 PxW223 - 94 | 1190223 Burma   | UoN |
| 635  | 635  | 2 | 177 PxW223 - 94 | 1190223 Burma   | UoN |
| 1016 | 1016 | 1 | 177 PxW223 - 94 | 1190223 Burma   | UoN |
| 18   | 18   | 3 | 178 PxW254 - 2  | 1190254 Morocco | UoN |
| 667  | 667  | 1 | 178 PxW254 - 2  | 1190254 Morocco | UoN |
| 747  | 747  | 2 | 178 PxW254 - 2  | 1190254 Morocco | UoN |
| 536  | 536  | 1 | 179 PxW254 - 3  | 1190254 Morocco | UoN |
| 574  | 574  | 2 | 179 PxW254 - 3  | 1190254 Morocco | UoN |
| 740  | 740  | 3 | 179 PxW254 - 3  | 1190254 Morocco | UoN |
| 343  | 343  | 3 | 180 PxW254 - 24 | 1190254 Morocco | UoN |

|      |      |   |                 |                        |     |
|------|------|---|-----------------|------------------------|-----|
| 903  | 903  | 1 | 180 PxW254 - 24 | 1190254 Morocco        | UoN |
| 928  | 928  | 2 | 180 PxW254 - 24 | 1190254 Morocco        | UoN |
| 347  | 347  | 3 | 181 PxW254 - 39 | 1190254 Morocco        | UoN |
| 785  | 785  | 1 | 181 PxW254 - 39 | 1190254 Morocco        | UoN |
| 1118 | 1118 | 2 | 181 PxW254 - 39 | 1190254 Morocco        | UoN |
| 569  | 569  | 2 | 182 PxW254 - 40 | 1190254 Morocco        | UoN |
| 717  | 717  | 3 | 182 PxW254 - 40 | 1190254 Morocco        | UoN |
| 1138 | 1138 | 1 | 182 PxW254 - 40 | 1190254 Morocco        | UoN |
| 137  | 137  | 3 | 183 PxW254 - 52 | 1190254 Morocco        | UoN |
| 988  | 988  | 2 | 183 PxW254 - 52 | 1190254 Morocco        | UoN |
| 1128 | 1128 | 1 | 183 PxW254 - 52 | 1190254 Morocco        | UoN |
| 704  | 704  | 3 | 184 PxW254 - 55 | 1190254 Morocco        | UoN |
| 934  | 934  | 2 | 184 PxW254 - 55 | 1190254 Morocco        | UoN |
| 1156 | 1156 | 1 | 184 PxW254 - 55 | 1190254 Morocco        | UoN |
| 355  | 355  | 3 | 185 PxW254 - 59 | 1190254 Morocco        | UoN |
| 419  | 419  | 1 | 185 PxW254 - 59 | 1190254 Morocco        | UoN |
| 1180 | 1180 | 2 | 185 PxW254 - 59 | 1190254 Morocco        | UoN |
| 242  | 242  | 3 | 186 PxW254 - 69 | 1190254 Morocco        | UoN |
| 507  | 507  | 2 | 186 PxW254 - 69 | 1190254 Morocco        | UoN |
| 763  | 763  | 1 | 186 PxW254 - 69 | 1190254 Morocco        | UoN |
| 237  | 237  | 3 | 187 PxW254 - 74 | 1190254 Morocco        | UoN |
| 677  | 677  | 1 | 187 PxW254 - 74 | 1190254 Morocco        | UoN |
| 993  | 993  | 2 | 187 PxW254 - 74 | 1190254 Morocco        | UoN |
| 486  | 486  | 3 | 188 PxW254 - 76 | 1190254 Morocco        | UoN |
| 547  | 547  | 1 | 188 PxW254 - 76 | 1190254 Morocco        | UoN |
| 1000 | 1000 | 2 | 188 PxW254 - 76 | 1190254 Morocco        | UoN |
| 454  | 454  | 2 | 189 PxW254 - 84 | 1190254 Morocco        | UoN |
| 482  | 482  | 3 | 189 PxW254 - 84 | 1190254 Morocco        | UoN |
| 541  | 541  | 1 | 189 PxW254 - 84 | 1190254 Morocco        | UoN |
| 758  | 758  | 2 | 190 PxW254 - 87 | 1190254 Morocco        | UoN |
| 823  | 823  | 3 | 190 PxW254 - 87 | 1190254 Morocco        | UoN |
| 887  | 887  | 1 | 190 PxW254 - 87 | 1190254 Morocco        | UoN |
| 571  | 571  | 2 | 191 PxW264 - 9  | 1190264 Canary Islands | UoN |

|      |      |   |                 |                        |     |
|------|------|---|-----------------|------------------------|-----|
| 761  | 761  | 1 | 191 PxW264 - 9  | 1190264 Canary Islands | UoN |
| 833  | 833  | 3 | 191 PxW264 - 9  | 1190264 Canary Islands | UoN |
| 431  | 431  | 1 | 192 PxW264 - 10 | 1190264 Canary Islands | UoN |
| 496  | 496  | 3 | 192 PxW264 - 10 | 1190264 Canary Islands | UoN |
| 1173 | 1173 | 2 | 192 PxW264 - 10 | 1190264 Canary Islands | UoN |
| 430  | 430  | 1 | 193 PxW264 - 12 | 1190264 Canary Islands | UoN |
| 844  | 844  | 3 | 193 PxW264 - 12 | 1190264 Canary Islands | UoN |
| 1103 | 1103 | 2 | 193 PxW264 - 12 | 1190264 Canary Islands | UoN |
| 455  | 455  | 2 | 194 PxW264 - 16 | 1190264 Canary Islands | UoN |
| 585  | 585  | 3 | 194 PxW264 - 16 | 1190264 Canary Islands | UoN |
| 1024 | 1024 | 1 | 194 PxW264 - 16 | 1190264 Canary Islands | UoN |
| 463  | 463  | 3 | 195 PxW264 - 17 | 1190264 Canary Islands | UoN |
| 518  | 518  | 2 | 195 PxW264 - 17 | 1190264 Canary Islands | UoN |
| 1007 | 1007 | 1 | 195 PxW264 - 17 | 1190264 Canary Islands | UoN |
| 305  | 305  | 1 | 196 PxW264 - 31 | 1190264 Canary Islands | UoN |
| 490  | 490  | 3 | 196 PxW264 - 31 | 1190264 Canary Islands | UoN |
| 924  | 924  | 2 | 196 PxW264 - 31 | 1190264 Canary Islands | UoN |
| 477  | 477  | 3 | 197 PxW264 - 33 | 1190264 Canary Islands | UoN |
| 813  | 813  | 2 | 197 PxW264 - 33 | 1190264 Canary Islands | UoN |
| 1142 | 1142 | 1 | 197 PxW264 - 33 | 1190264 Canary Islands | UoN |
| 127  | 127  | 3 | 198 PxW264 - 41 | 1190264 Canary Islands | UoN |
| 530  | 530  | 1 | 198 PxW264 - 41 | 1190264 Canary Islands | UoN |
| 984  | 984  | 2 | 198 PxW264 - 41 | 1190264 Canary Islands | UoN |
| 346  | 346  | 3 | 199 PxW264 - 47 | 1190264 Canary Islands | UoN |
| 686  | 686  | 2 | 199 PxW264 - 47 | 1190264 Canary Islands | UoN |
| 1039 | 1039 | 1 | 199 PxW264 - 47 | 1190264 Canary Islands | UoN |
| 118  | 118  | 3 | 200 PxW264 - 50 | 1190264 Canary Islands | UoN |
| 656  | 656  | 1 | 200 PxW264 - 50 | 1190264 Canary Islands | UoN |
| 1047 | 1047 | 2 | 200 PxW264 - 50 | 1190264 Canary Islands | UoN |
| 109  | 109  | 3 | 201 PxW264 - 51 | 1190264 Canary Islands | UoN |
| 560  | 560  | 1 | 201 PxW264 - 51 | 1190264 Canary Islands | UoN |
| 861  | 861  | 2 | 201 PxW264 - 51 | 1190264 Canary Islands | UoN |
| 588  | 588  | 3 | 202 PxW264 - 52 | 1190264 Canary Islands | UoN |



|      |      |   |                 |                        |     |
|------|------|---|-----------------|------------------------|-----|
| 1112 | 1112 | 2 | 202 PxW264 - 52 | 1190264 Canary Islands | UoN |
| 1146 | 1146 | 1 | 202 PxW264 - 52 | 1190264 Canary Islands | UoN |
| 232  | 232  | 3 | 203 PxW264 - 86 | 1190264 Canary Islands | UoN |
| 1044 | 1044 | 2 | 203 PxW264 - 86 | 1190264 Canary Islands | UoN |
| 1157 | 1157 | 1 | 203 PxW264 - 86 | 1190264 Canary Islands | UoN |
| 561  | 561  | 2 | 204 PxW273 - 11 | 1190273 Spain          | UoN |
| 601  | 601  | 3 | 204 PxW273 - 11 | 1190273 Spain          | UoN |
| 673  | 673  | 1 | 204 PxW273 - 11 | 1190273 Spain          | UoN |
| 259  | 259  | 3 | 205 PxW273 - 15 | 1190273 Spain          | UoN |
| 933  | 933  | 2 | 205 PxW273 - 15 | 1190273 Spain          | UoN |
| 1127 | 1127 | 1 | 205 PxW273 - 15 | 1190273 Spain          | UoN |
| 479  | 479  | 3 | 206 PxW273 - 19 | 1190273 Spain          | UoN |
| 875  | 875  | 2 | 206 PxW273 - 19 | 1190273 Spain          | UoN |
| 1148 | 1148 | 1 | 206 PxW273 - 19 | 1190273 Spain          | UoN |
| 391  | 391  | 2 | 207 PxW273 - 21 | 1190273 Spain          | UoN |
| 553  | 553  | 1 | 207 PxW273 - 21 | 1190273 Spain          | UoN |
| 603  | 603  | 3 | 207 PxW273 - 21 | 1190273 Spain          | UoN |
| 445  | 445  | 2 | 208 PxW273 - 26 | 1190273 Spain          | UoN |
| 500  | 500  | 3 | 208 PxW273 - 26 | 1190273 Spain          | UoN |
| 885  | 885  | 1 | 208 PxW273 - 26 | 1190273 Spain          | UoN |
| 465  | 465  | 3 | 209 PxW273 - 35 | 1190273 Spain          | UoN |
| 1031 | 1031 | 1 | 209 PxW273 - 35 | 1190273 Spain          | UoN |
| 1043 | 1043 | 2 | 209 PxW273 - 35 | 1190273 Spain          | UoN |
| 534  | 534  | 1 | 210 PxW273 - 45 | 1190273 Spain          | UoN |
| 716  | 716  | 3 | 210 PxW273 - 45 | 1190273 Spain          | UoN |
| 1107 | 1107 | 2 | 210 PxW273 - 45 | 1190273 Spain          | UoN |
| 226  | 226  | 3 | 211 PxW273 - 52 | 1190273 Spain          | UoN |
| 572  | 572  | 2 | 211 PxW273 - 52 | 1190273 Spain          | UoN |
| 1124 | 1124 | 1 | 211 PxW273 - 52 | 1190273 Spain          | UoN |
| 363  | 363  | 3 | 212 PxW273 - 58 | 1190273 Spain          | UoN |
| 920  | 920  | 1 | 212 PxW273 - 58 | 1190273 Spain          | UoN |
| 1115 | 1115 | 2 | 212 PxW273 - 58 | 1190273 Spain          | UoN |
| 645  | 645  | 1 | 213 PxW273 - 71 | 1190273 Spain          | UoN |

|      |      |   |                 |                |     |
|------|------|---|-----------------|----------------|-----|
| 839  | 839  | 3 | 213 PxW273 - 71 | 1190273 Spain  | UoN |
| 1164 | 1164 | 2 | 213 PxW273 - 71 | 1190273 Spain  | UoN |
| 358  | 358  | 3 | 214 PxW273 - 79 | 1190273 Spain  | UoN |
| 882  | 882  | 1 | 214 PxW273 - 79 | 1190273 Spain  | UoN |
| 1046 | 1046 | 2 | 214 PxW273 - 79 | 1190273 Spain  | UoN |
| 308  | 308  | 1 | 215 PxW273 - 81 | 1190273 Spain  | UoN |
| 737  | 737  | 3 | 215 PxW273 - 81 | 1190273 Spain  | UoN |
| 991  | 991  | 2 | 215 PxW273 - 81 | 1190273 Spain  | UoN |
| 111  | 111  | 3 | 216 PxW273 - 87 | 1190273 Spain  | UoN |
| 447  | 447  | 2 | 216 PxW273 - 87 | 1190273 Spain  | UoN |
| 786  | 786  | 1 | 216 PxW273 - 87 | 1190273 Spain  | UoN |
| 7    | 7    | 3 | 217 PxW291 - 8  | 1190291 Cyprus | UoN |
| 458  | 458  | 2 | 217 PxW291 - 8  | 1190291 Cyprus | UoN |
| 772  | 772  | 1 | 217 PxW291 - 8  | 1190291 Cyprus | UoN |
| 519  | 519  | 2 | 218 PxW291 - 12 | 1190291 Cyprus | UoN |
| 834  | 834  | 3 | 218 PxW291 - 12 | 1190291 Cyprus | UoN |
| 907  | 907  | 1 | 218 PxW291 - 12 | 1190291 Cyprus | UoN |
| 14   | 14   | 3 | 219 PxW291 - 13 | 1190291 Cyprus | UoN |
| 871  | 871  | 2 | 219 PxW291 - 13 | 1190291 Cyprus | UoN |
| 1002 | 1002 | 1 | 219 PxW291 - 13 | 1190291 Cyprus | UoN |
| 102  | 102  | 3 | 220 PxW291 - 23 | 1190291 Cyprus | UoN |
| 695  | 695  | 2 | 220 PxW291 - 23 | 1190291 Cyprus | UoN |
| 1136 | 1136 | 1 | 220 PxW291 - 23 | 1190291 Cyprus | UoN |
| 357  | 357  | 3 | 221 PxW291 - 25 | 1190291 Cyprus | UoN |
| 996  | 996  | 2 | 221 PxW291 - 25 | 1190291 Cyprus | UoN |
| 1158 | 1158 | 1 | 221 PxW291 - 25 | 1190291 Cyprus | UoN |
| 555  | 555  | 1 | 222 PxW291 - 35 | 1190291 Cyprus | UoN |
| 584  | 584  | 3 | 222 PxW291 - 35 | 1190291 Cyprus | UoN |
| 922  | 922  | 2 | 222 PxW291 - 35 | 1190291 Cyprus | UoN |
| 439  | 439  | 1 | 223 PxW291 - 39 | 1190291 Cyprus | UoN |
| 629  | 629  | 2 | 223 PxW291 - 39 | 1190291 Cyprus | UoN |
| 824  | 824  | 3 | 223 PxW291 - 39 | 1190291 Cyprus | UoN |
| 238  | 238  | 3 | 224 PxW291 - 45 | 1190291 Cyprus | UoN |

|      |      |   |                 |                |     |
|------|------|---|-----------------|----------------|-----|
| 448  | 448  | 2 | 224 PxW291 - 45 | 1190291 Cyprus | UoN |
| 678  | 678  | 1 | 224 PxW291 - 45 | 1190291 Cyprus | UoN |
| 129  | 129  | 3 | 225 PxW291 - 47 | 1190291 Cyprus | UoN |
| 752  | 752  | 2 | 225 PxW291 - 47 | 1190291 Cyprus | UoN |
| 1159 | 1159 | 1 | 225 PxW291 - 47 | 1190291 Cyprus | UoN |
| 367  | 367  | 3 | 226 PxW291 - 50 | 1190291 Cyprus | UoN |
| 416  | 416  | 1 | 226 PxW291 - 50 | 1190291 Cyprus | UoN |
| 759  | 759  | 2 | 226 PxW291 - 50 | 1190291 Cyprus | UoN |
| 368  | 368  | 3 | 227 PxW291 - 51 | 1190291 Cyprus | UoN |
| 521  | 521  | 1 | 227 PxW291 - 51 | 1190291 Cyprus | UoN |
| 995  | 995  | 2 | 227 PxW291 - 51 | 1190291 Cyprus | UoN |
| 328  | 328  | 2 | 228 PxW291 - 74 | 1190291 Cyprus | UoN |
| 420  | 420  | 1 | 228 PxW291 - 74 | 1190291 Cyprus | UoN |
| 701  | 701  | 3 | 228 PxW291 - 74 | 1190291 Cyprus | UoN |
| 356  | 356  | 3 | 229 PxW291 - 75 | 1190291 Cyprus | UoN |
| 1004 | 1004 | 1 | 229 PxW291 - 75 | 1190291 Cyprus | UoN |
| 1058 | 1058 | 2 | 229 PxW291 - 75 | 1190291 Cyprus | UoN |
| 116  | 116  | 3 | 230 PxW299 - 14 | 1190299 Turkey | UoN |
| 406  | 406  | 1 | 230 PxW299 - 14 | 1190299 Turkey | UoN |
| 986  | 986  | 2 | 230 PxW299 - 14 | 1190299 Turkey | UoN |
| 139  | 139  | 3 | 231 PxW299 - 17 | 1190299 Turkey | UoN |
| 666  | 666  | 1 | 231 PxW299 - 17 | 1190299 Turkey | UoN |
| 1106 | 1106 | 2 | 231 PxW299 - 17 | 1190299 Turkey | UoN |
| 488  | 488  | 3 | 232 PxW299 - 20 | 1190299 Turkey | UoN |
| 1052 | 1052 | 2 | 232 PxW299 - 20 | 1190299 Turkey | UoN |
| 1140 | 1140 | 1 | 232 PxW299 - 20 | 1190299 Turkey | UoN |
| 228  | 228  | 3 | 233 PxW299 - 31 | 1190299 Turkey | UoN |
| 550  | 550  | 1 | 233 PxW299 - 31 | 1190299 Turkey | UoN |
| 1056 | 1056 | 2 | 233 PxW299 - 31 | 1190299 Turkey | UoN |
| 622  | 622  | 2 | 234 PxW299 - 34 | 1190299 Turkey | UoN |
| 735  | 735  | 3 | 234 PxW299 - 34 | 1190299 Turkey | UoN |
| 1144 | 1144 | 1 | 234 PxW299 - 34 | 1190299 Turkey | UoN |
| 240  | 240  | 3 | 235 PxW299 - 40 | 1190299 Turkey | UoN |

|      |      |   |                 |                  |     |
|------|------|---|-----------------|------------------|-----|
| 660  | 660  | 1 | 235 PxW299 - 40 | 1190299 Turkey   | UoN |
| 985  | 985  | 2 | 235 PxW299 - 40 | 1190299 Turkey   | UoN |
| 558  | 558  | 1 | 236 PxW299 - 47 | 1190299 Turkey   | UoN |
| 730  | 730  | 3 | 236 PxW299 - 47 | 1190299 Turkey   | UoN |
| 1109 | 1109 | 2 | 236 PxW299 - 47 | 1190299 Turkey   | UoN |
| 565  | 565  | 2 | 237 PxW299 - 51 | 1190299 Turkey   | UoN |
| 610  | 610  | 3 | 237 PxW299 - 51 | 1190299 Turkey   | UoN |
| 1008 | 1008 | 1 | 237 PxW299 - 51 | 1190299 Turkey   | UoN |
| 258  | 258  | 3 | 238 PxW299 - 63 | 1190299 Turkey   | UoN |
| 911  | 911  | 1 | 238 PxW299 - 63 | 1190299 Turkey   | UoN |
| 994  | 994  | 2 | 238 PxW299 - 63 | 1190299 Turkey   | UoN |
| 395  | 395  | 2 | 239 PxW299 - 68 | 1190299 Turkey   | UoN |
| 676  | 676  | 1 | 239 PxW299 - 68 | 1190299 Turkey   | UoN |
| 846  | 846  | 3 | 239 PxW299 - 68 | 1190299 Turkey   | UoN |
| 322  | 322  | 2 | 240 PxW299 - 69 | 1190299 Turkey   | UoN |
| 489  | 489  | 3 | 240 PxW299 - 69 | 1190299 Turkey   | UoN |
| 1022 | 1022 | 1 | 240 PxW299 - 69 | 1190299 Turkey   | UoN |
| 11   | 11   | 3 | 241 PxW299 - 78 | 1190299 Turkey   | UoN |
| 393  | 393  | 2 | 241 PxW299 - 78 | 1190299 Turkey   | UoN |
| 767  | 767  | 1 | 241 PxW299 - 78 | 1190299 Turkey   | UoN |
| 664  | 664  | 1 | 242 PxW299 - 87 | 1190299 Turkey   | UoN |
| 715  | 715  | 3 | 242 PxW299 - 87 | 1190299 Turkey   | UoN |
| 1051 | 1051 | 2 | 242 PxW299 - 87 | 1190299 Turkey   | UoN |
| 374  | 374  | 3 | 243 PxW349 - 7  | 1190349 Bulgaria | UoN |
| 1021 | 1021 | 1 | 243 PxW349 - 7  | 1190349 Bulgaria | UoN |
| 1113 | 1113 | 2 | 243 PxW349 - 7  | 1190349 Bulgaria | UoN |
| 556  | 556  | 1 | 244 PxW349 - 10 | 1190349 Bulgaria | UoN |
| 734  | 734  | 3 | 244 PxW349 - 10 | 1190349 Bulgaria | UoN |
| 1172 | 1172 | 2 | 244 PxW349 - 10 | 1190349 Bulgaria | UoN |
| 114  | 114  | 3 | 245 PxW349 - 16 | 1190349 Bulgaria | UoN |
| 511  | 511  | 2 | 245 PxW349 - 16 | 1190349 Bulgaria | UoN |
| 790  | 790  | 1 | 245 PxW349 - 16 | 1190349 Bulgaria | UoN |
| 499  | 499  | 3 | 246 PxW349 - 19 | 1190349 Bulgaria | UoN |

|      |      |   |                 |                  |     |
|------|------|---|-----------------|------------------|-----|
| 1119 | 1119 | 2 | 246 PxW349 - 19 | 1190349 Bulgaria | UoN |
| 1131 | 1131 | 1 | 246 PxW349 - 19 | 1190349 Bulgaria | UoN |
| 595  | 595  | 3 | 247 PxW349 - 22 | 1190349 Bulgaria | UoN |
| 1153 | 1153 | 1 | 247 PxW349 - 22 | 1190349 Bulgaria | UoN |
| 1170 | 1170 | 2 | 247 PxW349 - 22 | 1190349 Bulgaria | UoN |
| 316  | 316  | 1 | 248 PxW349 - 28 | 1190349 Bulgaria | UoN |
| 492  | 492  | 3 | 248 PxW349 - 28 | 1190349 Bulgaria | UoN |
| 878  | 878  | 2 | 248 PxW349 - 28 | 1190349 Bulgaria | UoN |
| 339  | 339  | 2 | 249 PxW349 - 31 | 1190349 Bulgaria | UoN |
| 661  | 661  | 1 | 249 PxW349 - 31 | 1190349 Bulgaria | UoN |
| 857  | 857  | 3 | 249 PxW349 - 31 | 1190349 Bulgaria | UoN |
| 106  | 106  | 3 | 250 PxW349 - 42 | 1190349 Bulgaria | UoN |
| 625  | 625  | 2 | 250 PxW349 - 42 | 1190349 Bulgaria | UoN |
| 674  | 674  | 1 | 250 PxW349 - 42 | 1190349 Bulgaria | UoN |
| 224  | 224  | 3 | 251 PxW349 - 46 | 1190349 Bulgaria | UoN |
| 742  | 742  | 2 | 251 PxW349 - 46 | 1190349 Bulgaria | UoN |
| 782  | 782  | 1 | 251 PxW349 - 46 | 1190349 Bulgaria | UoN |
| 327  | 327  | 2 | 252 PxW349 - 58 | 1190349 Bulgaria | UoN |
| 848  | 848  | 3 | 252 PxW349 - 58 | 1190349 Bulgaria | UoN |
| 895  | 895  | 1 | 252 PxW349 - 58 | 1190349 Bulgaria | UoN |
| 378  | 378  | 3 | 253 PxW349 - 65 | 1190349 Bulgaria | UoN |
| 921  | 921  | 2 | 253 PxW349 - 65 | 1190349 Bulgaria | UoN |
| 1012 | 1012 | 1 | 253 PxW349 - 65 | 1190349 Bulgaria | UoN |
| 441  | 441  | 2 | 254 PxW349 - 66 | 1190349 Bulgaria | UoN |
| 529  | 529  | 1 | 254 PxW349 - 66 | 1190349 Bulgaria | UoN |
| 826  | 826  | 3 | 254 PxW349 - 66 | 1190349 Bulgaria | UoN |
| 608  | 608  | 3 | 255 PxW349 - 72 | 1190349 Bulgaria | UoN |
| 650  | 650  | 1 | 255 PxW349 - 72 | 1190349 Bulgaria | UoN |
| 989  | 989  | 2 | 255 PxW349 - 72 | 1190349 Bulgaria | UoN |
| 736  | 736  | 3 | 256 PxW396 - 5  | 1190396 Portugal | UoN |
| 777  | 777  | 1 | 256 PxW396 - 5  | 1190396 Portugal | UoN |
| 1116 | 1116 | 2 | 256 PxW396 - 5  | 1190396 Portugal | UoN |
| 619  | 619  | 3 | 257 PxW396 - 12 | 1190396 Portugal | UoN |

|      |      |   |                 |                  |     |
|------|------|---|-----------------|------------------|-----|
| 693  | 693  | 2 | 257 PxW396 - 12 | 1190396 Portugal | UoN |
| 1151 | 1151 | 1 | 257 PxW396 - 12 | 1190396 Portugal | UoN |
| 244  | 244  | 3 | 258 PxW396 - 19 | 1190396 Portugal | UoN |
| 318  | 318  | 1 | 258 PxW396 - 19 | 1190396 Portugal | UoN |
| 741  | 741  | 2 | 258 PxW396 - 19 | 1190396 Portugal | UoN |
| 17   | 17   | 3 | 259 PxW396 - 30 | 1190396 Portugal | UoN |
| 317  | 317  | 1 | 259 PxW396 - 30 | 1190396 Portugal | UoN |
| 927  | 927  | 2 | 259 PxW396 - 30 | 1190396 Portugal | UoN |
| 473  | 473  | 3 | 260 PxW396 - 37 | 1190396 Portugal | UoN |
| 981  | 981  | 2 | 260 PxW396 - 37 | 1190396 Portugal | UoN |
| 1035 | 1035 | 1 | 260 PxW396 - 37 | 1190396 Portugal | UoN |
| 246  | 246  | 3 | 261 PxW396 - 46 | 1190396 Portugal | UoN |
| 808  | 808  | 2 | 261 PxW396 - 46 | 1190396 Portugal | UoN |
| 889  | 889  | 1 | 261 PxW396 - 46 | 1190396 Portugal | UoN |
| 467  | 467  | 3 | 262 PxW396 - 48 | 1190396 Portugal | UoN |
| 688  | 688  | 2 | 262 PxW396 - 48 | 1190396 Portugal | UoN |
| 914  | 914  | 1 | 262 PxW396 - 48 | 1190396 Portugal | UoN |
| 590  | 590  | 3 | 263 PxW396 - 49 | 1190396 Portugal | UoN |
| 806  | 806  | 2 | 263 PxW396 - 49 | 1190396 Portugal | UoN |
| 1037 | 1037 | 1 | 263 PxW396 - 49 | 1190396 Portugal | UoN |
| 323  | 323  | 2 | 264 PxW396 - 51 | 1190396 Portugal | UoN |
| 370  | 370  | 3 | 264 PxW396 - 51 | 1190396 Portugal | UoN |
| 422  | 422  | 1 | 264 PxW396 - 51 | 1190396 Portugal | UoN |
| 229  | 229  | 3 | 265 PxW396 - 56 | 1190396 Portugal | UoN |
| 789  | 789  | 1 | 265 PxW396 - 56 | 1190396 Portugal | UoN |
| 812  | 812  | 2 | 265 PxW396 - 56 | 1190396 Portugal | UoN |
| 636  | 636  | 2 | 266 PxW396 - 60 | 1190396 Portugal | UoN |
| 705  | 705  | 3 | 266 PxW396 - 60 | 1190396 Portugal | UoN |
| 1026 | 1026 | 1 | 266 PxW396 - 60 | 1190396 Portugal | UoN |
| 612  | 612  | 3 | 267 PxW396 - 62 | 1190396 Portugal | UoN |
| 865  | 865  | 2 | 267 PxW396 - 62 | 1190396 Portugal | UoN |
| 1129 | 1129 | 1 | 267 PxW396 - 62 | 1190396 Portugal | UoN |
| 637  | 637  | 2 | 268 PxW396 - 73 | 1190396 Portugal | UoN |

|      |      |   |                 |                  |     |
|------|------|---|-----------------|------------------|-----|
| 718  | 718  | 3 | 268 PxW396 - 73 | 1190396 Portugal | UoN |
| 771  | 771  | 1 | 268 PxW396 - 73 | 1190396 Portugal | UoN |
| 803  | 803  | 2 | 269 PxW397 - 20 | 1190397 Portugal | UoN |
| 849  | 849  | 3 | 269 PxW397 - 20 | 1190397 Portugal | UoN |
| 918  | 918  | 1 | 269 PxW397 - 20 | 1190397 Portugal | UoN |
| 119  | 119  | 3 | 270 PxW397 - 26 | 1190397 Portugal | UoN |
| 936  | 936  | 2 | 270 PxW397 - 26 | 1190397 Portugal | UoN |
| 1038 | 1038 | 1 | 270 PxW397 - 26 | 1190397 Portugal | UoN |
| 6    | 6    | 3 | 271 PxW397 - 33 | 1190397 Portugal | UoN |
| 382  | 382  | 2 | 271 PxW397 - 33 | 1190397 Portugal | UoN |
| 905  | 905  | 1 | 271 PxW397 - 33 | 1190397 Portugal | UoN |
| 133  | 133  | 3 | 272 PxW397 - 48 | 1190397 Portugal | UoN |
| 820  | 820  | 2 | 272 PxW397 - 48 | 1190397 Portugal | UoN |
| 1018 | 1018 | 1 | 272 PxW397 - 48 | 1190397 Portugal | UoN |
| 630  | 630  | 2 | 273 PxW397 - 50 | 1190397 Portugal | UoN |
| 794  | 794  | 1 | 273 PxW397 - 50 | 1190397 Portugal | UoN |
| 847  | 847  | 3 | 273 PxW397 - 50 | 1190397 Portugal | UoN |
| 136  | 136  | 3 | 274 PxW397 - 51 | 1190397 Portugal | UoN |
| 787  | 787  | 1 | 274 PxW397 - 51 | 1190397 Portugal | UoN |
| 864  | 864  | 2 | 274 PxW397 - 51 | 1190397 Portugal | UoN |
| 331  | 331  | 2 | 275 PxW397 - 61 | 1190397 Portugal | UoN |
| 724  | 724  | 3 | 275 PxW397 - 61 | 1190397 Portugal | UoN |
| 784  | 784  | 1 | 275 PxW397 - 61 | 1190397 Portugal | UoN |
| 134  | 134  | 3 | 276 PxW397 - 76 | 1190397 Portugal | UoN |
| 570  | 570  | 2 | 276 PxW397 - 76 | 1190397 Portugal | UoN |
| 881  | 881  | 1 | 276 PxW397 - 76 | 1190397 Portugal | UoN |
| 506  | 506  | 2 | 277 PxW397 - 80 | 1190397 Portugal | UoN |
| 591  | 591  | 3 | 277 PxW397 - 80 | 1190397 Portugal | UoN |
| 909  | 909  | 1 | 277 PxW397 - 80 | 1190397 Portugal | UoN |
| 310  | 310  | 1 | 278 PxW397 - 82 | 1190397 Portugal | UoN |
| 369  | 369  | 3 | 278 PxW397 - 82 | 1190397 Portugal | UoN |
| 1048 | 1048 | 2 | 278 PxW397 - 82 | 1190397 Portugal | UoN |
| 452  | 452  | 2 | 279 PxW397 - 83 | 1190397 Portugal | UoN |

|      |      |   |                 |                   |     |
|------|------|---|-----------------|-------------------|-----|
| 653  | 653  | 1 | 279 PxW397 - 83 | 1190397 Portugal  | UoN |
| 702  | 702  | 3 | 279 PxW397 - 83 | 1190397 Portugal  | UoN |
| 415  | 415  | 1 | 280 PxW397 - 88 | 1190397 Portugal  | UoN |
| 450  | 450  | 2 | 280 PxW397 - 88 | 1190397 Portugal  | UoN |
| 613  | 613  | 3 | 280 PxW397 - 88 | 1190397 Portugal  | UoN |
| 239  | 239  | 3 | 281 PxW397 - 89 | 1190397 Portugal  | UoN |
| 564  | 564  | 2 | 281 PxW397 - 89 | 1190397 Portugal  | UoN |
| 908  | 908  | 1 | 281 PxW397 - 89 | 1190397 Portugal  | UoN |
| 319  | 319  | 1 | 282 PxW398 - 18 | 1190398 Palestine | UoN |
| 388  | 388  | 2 | 282 PxW398 - 18 | 1190398 Palestine | UoN |
| 594  | 594  | 3 | 282 PxW398 - 18 | 1190398 Palestine | UoN |
| 235  | 235  | 3 | 283 PxW398 - 21 | 1190398 Palestine | UoN |
| 883  | 883  | 1 | 283 PxW398 - 21 | 1190398 Palestine | UoN |
| 930  | 930  | 2 | 283 PxW398 - 21 | 1190398 Palestine | UoN |
| 9    | 9    | 3 | 284 PxW398 - 41 | 1190398 Palestine | UoN |
| 414  | 414  | 1 | 284 PxW398 - 41 | 1190398 Palestine | UoN |
| 873  | 873  | 2 | 284 PxW398 - 41 | 1190398 Palestine | UoN |
| 4    | 4    | 3 | 285 PxW398 - 42 | 1190398 Palestine | UoN |
| 433  | 433  | 1 | 285 PxW398 - 42 | 1190398 Palestine | UoN |
| 804  | 804  | 2 | 285 PxW398 - 42 | 1190398 Palestine | UoN |
| 687  | 687  | 2 | 286 PxW398 - 44 | 1190398 Palestine | UoN |
| 731  | 731  | 3 | 286 PxW398 - 44 | 1190398 Palestine | UoN |
| 1123 | 1123 | 1 | 286 PxW398 - 44 | 1190398 Palestine | UoN |
| 380  | 380  | 3 | 287 PxW398 - 49 | 1190398 Palestine | UoN |
| 802  | 802  | 2 | 287 PxW398 - 49 | 1190398 Palestine | UoN |
| 1139 | 1139 | 1 | 287 PxW398 - 49 | 1190398 Palestine | UoN |
| 138  | 138  | 3 | 288 PxW398 - 55 | 1190398 Palestine | UoN |
| 438  | 438  | 1 | 288 PxW398 - 55 | 1190398 Palestine | UoN |
| 1057 | 1057 | 2 | 288 PxW398 - 55 | 1190398 Palestine | UoN |
| 409  | 409  | 1 | 289 PxW398 - 56 | 1190398 Palestine | UoN |
| 733  | 733  | 3 | 289 PxW398 - 56 | 1190398 Palestine | UoN |
| 819  | 819  | 2 | 289 PxW398 - 56 | 1190398 Palestine | UoN |
| 599  | 599  | 3 | 290 PxW398 - 60 | 1190398 Palestine | UoN |



|      |      |   |                 |                   |     |
|------|------|---|-----------------|-------------------|-----|
| 679  | 679  | 1 | 290 PxW398 - 60 | 1190398 Palestine | UoN |
| 1169 | 1169 | 2 | 290 PxW398 - 60 | 1190398 Palestine | UoN |
| 110  | 110  | 3 | 291 PxW398 - 63 | 1190398 Palestine | UoN |
| 888  | 888  | 1 | 291 PxW398 - 63 | 1190398 Palestine | UoN |
| 1111 | 1111 | 2 | 291 PxW398 - 63 | 1190398 Palestine | UoN |
| 505  | 505  | 2 | 292 PxW398 - 74 | 1190398 Palestine | UoN |
| 611  | 611  | 3 | 292 PxW398 - 74 | 1190398 Palestine | UoN |
| 1030 | 1030 | 1 | 292 PxW398 - 74 | 1190398 Palestine | UoN |
| 354  | 354  | 3 | 293 PxW398 - 81 | 1190398 Palestine | UoN |
| 563  | 563  | 2 | 293 PxW398 - 81 | 1190398 Palestine | UoN |
| 788  | 788  | 1 | 293 PxW398 - 81 | 1190398 Palestine | UoN |
| 222  | 222  | 3 | 294 PxW398 - 85 | 1190398 Palestine | UoN |
| 333  | 333  | 2 | 294 PxW398 - 85 | 1190398 Palestine | UoN |
| 1009 | 1009 | 1 | 294 PxW398 - 85 | 1190398 Palestine | UoN |
| 682  | 682  | 2 | 295 PxW420 - 1  | 1190420 India     | UoN |
| 725  | 725  | 3 | 295 PxW420 - 1  | 1190420 India     | UoN |
| 792  | 792  | 1 | 295 PxW420 - 1  | 1190420 India     | UoN |
| 404  | 404  | 1 | 296 PxW420 - 3  | 1190420 India     | UoN |
| 831  | 831  | 3 | 296 PxW420 - 3  | 1190420 India     | UoN |
| 1045 | 1045 | 2 | 296 PxW420 - 3  | 1190420 India     | UoN |
| 399  | 399  | 2 | 297 PxW420 - 8  | 1190420 India     | UoN |
| 494  | 494  | 3 | 297 PxW420 - 8  | 1190420 India     | UoN |
| 916  | 916  | 1 | 297 PxW420 - 8  | 1190420 India     | UoN |
| 424  | 424  | 1 | 298 PxW420 - 10 | 1190420 India     | UoN |
| 746  | 746  | 2 | 298 PxW420 - 10 | 1190420 India     | UoN |
| 850  | 850  | 3 | 298 PxW420 - 10 | 1190420 India     | UoN |
| 260  | 260  | 3 | 299 PxW420 - 11 | 1190420 India     | UoN |
| 302  | 302  | 1 | 299 PxW420 - 11 | 1190420 India     | UoN |
| 1101 | 1101 | 2 | 299 PxW420 - 11 | 1190420 India     | UoN |
| 20   | 20   | 3 | 300 PxW420 - 21 | 1190420 India     | UoN |
| 694  | 694  | 2 | 300 PxW420 - 21 | 1190420 India     | UoN |
| 891  | 891  | 1 | 300 PxW420 - 21 | 1190420 India     | UoN |
| 253  | 253  | 3 | 301 PxW420 - 22 | 1190420 India     | UoN |

|      |      |   |                 |               |     |
|------|------|---|-----------------|---------------|-----|
| 385  | 385  | 2 | 301 PxW420 - 22 | 1190420 India | UoN |
| 1023 | 1023 | 1 | 301 PxW420 - 22 | 1190420 India | UoN |
| 841  | 841  | 3 | 302 PxW420 - 25 | 1190420 India | UoN |
| 868  | 868  | 2 | 302 PxW420 - 25 | 1190420 India | UoN |
| 1150 | 1150 | 1 | 302 PxW420 - 25 | 1190420 India | UoN |
| 15   | 15   | 3 | 303 PxW420 - 31 | 1190420 India | UoN |
| 527  | 527  | 1 | 303 PxW420 - 31 | 1190420 India | UoN |
| 1178 | 1178 | 2 | 303 PxW420 - 31 | 1190420 India | UoN |
| 345  | 345  | 3 | 304 PxW420 - 32 | 1190420 India | UoN |
| 762  | 762  | 1 | 304 PxW420 - 32 | 1190420 India | UoN |
| 1102 | 1102 | 2 | 304 PxW420 - 32 | 1190420 India | UoN |
| 390  | 390  | 2 | 305 PxW420 - 37 | 1190420 India | UoN |
| 830  | 830  | 3 | 305 PxW420 - 37 | 1190420 India | UoN |
| 893  | 893  | 1 | 305 PxW420 - 37 | 1190420 India | UoN |
| 365  | 365  | 3 | 306 PxW420 - 67 | 1190420 India | UoN |
| 384  | 384  | 2 | 306 PxW420 - 67 | 1190420 India | UoN |
| 672  | 672  | 1 | 306 PxW420 - 67 | 1190420 India | UoN |
| 697  | 697  | 2 | 307 PxW420 - 94 | 1190420 India | UoN |
| 712  | 712  | 3 | 307 PxW420 - 94 | 1190420 India | UoN |
| 1006 | 1006 | 1 | 307 PxW420 - 94 | 1190420 India | UoN |
| 301  | 301  | 1 | 308 PxW546 - 3  | 1190546 Spain | UoN |
| 344  | 344  | 3 | 308 PxW546 - 3  | 1190546 Spain | UoN |
| 700  | 700  | 2 | 308 PxW546 - 3  | 1190546 Spain | UoN |
| 436  | 436  | 1 | 309 PxW546 - 8  | 1190546 Spain | UoN |
| 475  | 475  | 3 | 309 PxW546 - 8  | 1190546 Spain | UoN |
| 811  | 811  | 2 | 309 PxW546 - 8  | 1190546 Spain | UoN |
| 359  | 359  | 3 | 310 PxW546 - 12 | 1190546 Spain | UoN |
| 396  | 396  | 2 | 310 PxW546 - 12 | 1190546 Spain | UoN |
| 898  | 898  | 1 | 310 PxW546 - 12 | 1190546 Spain | UoN |
| 329  | 329  | 2 | 311 PxW546 - 15 | 1190546 Spain | UoN |
| 497  | 497  | 3 | 311 PxW546 - 15 | 1190546 Spain | UoN |
| 1141 | 1141 | 1 | 311 PxW546 - 15 | 1190546 Spain | UoN |
| 566  | 566  | 2 | 312 PxW546 - 16 | 1190546 Spain | UoN |

|      |      |   |                 |                |     |
|------|------|---|-----------------|----------------|-----|
| 593  | 593  | 3 | 312 PxW546 - 16 | 1190546 Spain  | UoN |
| 884  | 884  | 1 | 312 PxW546 - 16 | 1190546 Spain  | UoN |
| 313  | 313  | 1 | 313 PxW546 - 20 | 1190546 Spain  | UoN |
| 720  | 720  | 3 | 313 PxW546 - 20 | 1190546 Spain  | UoN |
| 743  | 743  | 2 | 313 PxW546 - 20 | 1190546 Spain  | UoN |
| 320  | 320  | 1 | 314 PxW546 - 24 | 1190546 Spain  | UoN |
| 326  | 326  | 2 | 314 PxW546 - 24 | 1190546 Spain  | UoN |
| 618  | 618  | 3 | 314 PxW546 - 24 | 1190546 Spain  | UoN |
| 524  | 524  | 1 | 315 PxW546 - 25 | 1190546 Spain  | UoN |
| 852  | 852  | 3 | 315 PxW546 - 25 | 1190546 Spain  | UoN |
| 931  | 931  | 2 | 315 PxW546 - 25 | 1190546 Spain  | UoN |
| 383  | 383  | 2 | 316 PxW546 - 27 | 1190546 Spain  | UoN |
| 428  | 428  | 1 | 316 PxW546 - 27 | 1190546 Spain  | UoN |
| 726  | 726  | 3 | 316 PxW546 - 27 | 1190546 Spain  | UoN |
| 495  | 495  | 3 | 317 PxW546 - 29 | 1190546 Spain  | UoN |
| 575  | 575  | 2 | 317 PxW546 - 29 | 1190546 Spain  | UoN |
| 1027 | 1027 | 1 | 317 PxW546 - 29 | 1190546 Spain  | UoN |
| 248  | 248  | 3 | 318 PxW546 - 32 | 1190546 Spain  | UoN |
| 321  | 321  | 2 | 318 PxW546 - 32 | 1190546 Spain  | UoN |
| 800  | 800  | 1 | 318 PxW546 - 32 | 1190546 Spain  | UoN |
| 503  | 503  | 2 | 319 PxW546 - 38 | 1190546 Spain  | UoN |
| 522  | 522  | 1 | 319 PxW546 - 38 | 1190546 Spain  | UoN |
| 829  | 829  | 3 | 319 PxW546 - 38 | 1190546 Spain  | UoN |
| 616  | 616  | 3 | 320 PxW546 - 47 | 1190546 Spain  | UoN |
| 675  | 675  | 1 | 320 PxW546 - 47 | 1190546 Spain  | UoN |
| 1104 | 1104 | 2 | 320 PxW546 - 47 | 1190546 Spain  | UoN |
| 128  | 128  | 3 | 321 PxW566 - 7  | 1190566 Greece | UoN |
| 624  | 624  | 2 | 321 PxW566 - 7  | 1190566 Greece | UoN |
| 1137 | 1137 | 1 | 321 PxW566 - 7  | 1190566 Greece | UoN |
| 508  | 508  | 2 | 322 PxW566 - 12 | 1190566 Greece | UoN |
| 615  | 615  | 3 | 322 PxW566 - 12 | 1190566 Greece | UoN |
| 1133 | 1133 | 1 | 322 PxW566 - 12 | 1190566 Greece | UoN |
| 443  | 443  | 2 | 323 PxW566 - 14 | 1190566 Greece | UoN |

|      |      |   |                 |                |     |
|------|------|---|-----------------|----------------|-----|
| 602  | 602  | 3 | 323 PxW566 - 14 | 1190566 Greece | UoN |
| 1149 | 1149 | 1 | 323 PxW566 - 14 | 1190566 Greece | UoN |
| 598  | 598  | 3 | 324 PxW566 - 17 | 1190566 Greece | UoN |
| 628  | 628  | 2 | 324 PxW566 - 17 | 1190566 Greece | UoN |
| 1135 | 1135 | 1 | 324 PxW566 - 17 | 1190566 Greece | UoN |
| 412  | 412  | 1 | 325 PxW566 - 20 | 1190566 Greece | UoN |
| 681  | 681  | 2 | 325 PxW566 - 20 | 1190566 Greece | UoN |
| 827  | 827  | 3 | 325 PxW566 - 20 | 1190566 Greece | UoN |
| 254  | 254  | 3 | 326 PxW566 - 21 | 1190566 Greece | UoN |
| 638  | 638  | 2 | 326 PxW566 - 21 | 1190566 Greece | UoN |
| 1147 | 1147 | 1 | 326 PxW566 - 21 | 1190566 Greece | UoN |
| 103  | 103  | 3 | 327 PxW566 - 23 | 1190566 Greece | UoN |
| 577  | 577  | 2 | 327 PxW566 - 23 | 1190566 Greece | UoN |
| 1034 | 1034 | 1 | 327 PxW566 - 23 | 1190566 Greece | UoN |
| 340  | 340  | 2 | 328 PxW566 - 24 | 1190566 Greece | UoN |
| 649  | 649  | 1 | 328 PxW566 - 24 | 1190566 Greece | UoN |
| 828  | 828  | 3 | 328 PxW566 - 24 | 1190566 Greece | UoN |
| 483  | 483  | 3 | 329 PxW566 - 35 | 1190566 Greece | UoN |
| 755  | 755  | 2 | 329 PxW566 - 35 | 1190566 Greece | UoN |
| 1014 | 1014 | 1 | 329 PxW566 - 35 | 1190566 Greece | UoN |
| 350  | 350  | 3 | 330 PxW566 - 50 | 1190566 Greece | UoN |
| 745  | 745  | 2 | 330 PxW566 - 50 | 1190566 Greece | UoN |
| 1033 | 1033 | 1 | 330 PxW566 - 50 | 1190566 Greece | UoN |
| 373  | 373  | 3 | 331 PxW566 - 52 | 1190566 Greece | UoN |
| 631  | 631  | 2 | 331 PxW566 - 52 | 1190566 Greece | UoN |
| 896  | 896  | 1 | 331 PxW566 - 52 | 1190566 Greece | UoN |
| 337  | 337  | 2 | 332 PxW566 - 72 | 1190566 Greece | UoN |
| 476  | 476  | 3 | 332 PxW566 - 72 | 1190566 Greece | UoN |
| 890  | 890  | 1 | 332 PxW566 - 72 | 1190566 Greece | UoN |
| 517  | 517  | 2 | 333 PxW566 - 92 | 1190566 Greece | UoN |
| 596  | 596  | 3 | 333 PxW566 - 92 | 1190566 Greece | UoN |
| 641  | 641  | 1 | 333 PxW566 - 92 | 1190566 Greece | UoN |
| 121  | 121  | 3 | 334 PxW685 - 1  | 1190685 Spain  | UoN |

|      |      |   |                 |               |     |
|------|------|---|-----------------|---------------|-----|
| 513  | 513  | 2 | 334 PxW685 - 1  | 1190685 Spain | UoN |
| 892  | 892  | 1 | 334 PxW685 - 1  | 1190685 Spain | UoN |
| 617  | 617  | 3 | 335 PxW685 - 6  | 1190685 Spain | UoN |
| 640  | 640  | 2 | 335 PxW685 - 6  | 1190685 Spain | UoN |
| 910  | 910  | 1 | 335 PxW685 - 6  | 1190685 Spain | UoN |
| 418  | 418  | 1 | 336 PxW685 - 7  | 1190685 Spain | UoN |
| 471  | 471  | 3 | 336 PxW685 - 7  | 1190685 Spain | UoN |
| 1117 | 1117 | 2 | 336 PxW685 - 7  | 1190685 Spain | UoN |
| 330  | 330  | 2 | 337 PxW685 - 9  | 1190685 Spain | UoN |
| 540  | 540  | 1 | 337 PxW685 - 9  | 1190685 Spain | UoN |
| 586  | 586  | 3 | 337 PxW685 - 9  | 1190685 Spain | UoN |
| 815  | 815  | 2 | 338 PxW685 - 12 | 1190685 Spain | UoN |
| 825  | 825  | 3 | 338 PxW685 - 12 | 1190685 Spain | UoN |
| 1122 | 1122 | 1 | 338 PxW685 - 12 | 1190685 Spain | UoN |
| 568  | 568  | 2 | 339 PxW685 - 16 | 1190685 Spain | UoN |
| 710  | 710  | 3 | 339 PxW685 - 16 | 1190685 Spain | UoN |
| 1155 | 1155 | 1 | 339 PxW685 - 16 | 1190685 Spain | UoN |
| 514  | 514  | 2 | 340 PxW685 - 22 | 1190685 Spain | UoN |
| 671  | 671  | 1 | 340 PxW685 - 22 | 1190685 Spain | UoN |
| 723  | 723  | 3 | 340 PxW685 - 22 | 1190685 Spain | UoN |
| 126  | 126  | 3 | 341 PxW685 - 36 | 1190685 Spain | UoN |
| 654  | 654  | 1 | 341 PxW685 - 36 | 1190685 Spain | UoN |
| 932  | 932  | 2 | 341 PxW685 - 36 | 1190685 Spain | UoN |
| 573  | 573  | 2 | 342 PxW685 - 41 | 1190685 Spain | UoN |
| 855  | 855  | 3 | 342 PxW685 - 41 | 1190685 Spain | UoN |
| 1015 | 1015 | 1 | 342 PxW685 - 41 | 1190685 Spain | UoN |
| 3    | 3    | 3 | 343 PxW685 - 44 | 1190685 Spain | UoN |
| 528  | 528  | 1 | 343 PxW685 - 44 | 1190685 Spain | UoN |
| 816  | 816  | 2 | 343 PxW685 - 44 | 1190685 Spain | UoN |
| 230  | 230  | 3 | 344 PxW685 - 55 | 1190685 Spain | UoN |
| 309  | 309  | 1 | 344 PxW685 - 55 | 1190685 Spain | UoN |
| 814  | 814  | 2 | 344 PxW685 - 55 | 1190685 Spain | UoN |
| 360  | 360  | 3 | 345 PxW685 - 80 | 1190685 Spain | UoN |

|      |      |   |                 |                 |     |
|------|------|---|-----------------|-----------------|-----|
| 862  | 862  | 2 | 345 PxW685 - 80 | 1190685 Spain   | UoN |
| 902  | 902  | 1 | 345 PxW685 - 80 | 1190685 Spain   | UoN |
| 342  | 342  | 3 | 346 PxW685 - 88 | 1190685 Spain   | UoN |
| 434  | 434  | 1 | 346 PxW685 - 88 | 1190685 Spain   | UoN |
| 937  | 937  | 2 | 346 PxW685 - 88 | 1190685 Spain   | UoN |
| 130  | 130  | 3 | 347 PxW811 - 10 | 1190811 Tunisia | UoN |
| 751  | 751  | 2 | 347 PxW811 - 10 | 1190811 Tunisia | UoN |
| 779  | 779  | 1 | 347 PxW811 - 10 | 1190811 Tunisia | UoN |
| 487  | 487  | 3 | 348 PxW811 - 26 | 1190811 Tunisia | UoN |
| 652  | 652  | 1 | 348 PxW811 - 26 | 1190811 Tunisia | UoN |
| 1114 | 1114 | 2 | 348 PxW811 - 26 | 1190811 Tunisia | UoN |
| 257  | 257  | 3 | 349 PxW811 - 28 | 1190811 Tunisia | UoN |
| 413  | 413  | 1 | 349 PxW811 - 28 | 1190811 Tunisia | UoN |
| 879  | 879  | 2 | 349 PxW811 - 28 | 1190811 Tunisia | UoN |
| 140  | 140  | 3 | 350 PxW811 - 30 | 1190811 Tunisia | UoN |
| 557  | 557  | 1 | 350 PxW811 - 30 | 1190811 Tunisia | UoN |
| 940  | 940  | 2 | 350 PxW811 - 30 | 1190811 Tunisia | UoN |
| 233  | 233  | 3 | 351 PxW811 - 42 | 1190811 Tunisia | UoN |
| 769  | 769  | 1 | 351 PxW811 - 42 | 1190811 Tunisia | UoN |
| 1162 | 1162 | 2 | 351 PxW811 - 42 | 1190811 Tunisia | UoN |
| 551  | 551  | 1 | 352 PxW811 - 50 | 1190811 Tunisia | UoN |
| 634  | 634  | 2 | 352 PxW811 - 50 | 1190811 Tunisia | UoN |
| 821  | 821  | 3 | 352 PxW811 - 50 | 1190811 Tunisia | UoN |
| 303  | 303  | 1 | 353 PxW811 - 56 | 1190811 Tunisia | UoN |
| 509  | 509  | 2 | 353 PxW811 - 56 | 1190811 Tunisia | UoN |
| 719  | 719  | 3 | 353 PxW811 - 56 | 1190811 Tunisia | UoN |
| 397  | 397  | 2 | 354 PxW811 - 59 | 1190811 Tunisia | UoN |
| 491  | 491  | 3 | 354 PxW811 - 59 | 1190811 Tunisia | UoN |
| 1005 | 1005 | 1 | 354 PxW811 - 59 | 1190811 Tunisia | UoN |
| 311  | 311  | 1 | 355 PxW811 - 60 | 1190811 Tunisia | UoN |
| 805  | 805  | 2 | 355 PxW811 - 60 | 1190811 Tunisia | UoN |
| 854  | 854  | 3 | 355 PxW811 - 60 | 1190811 Tunisia | UoN |
| 749  | 749  | 2 | 356 PxW811 - 83 | 1190811 Tunisia | UoN |

|      |      |   |                 |                 |      |
|------|------|---|-----------------|-----------------|------|
| 840  | 840  | 3 | 356 PxW811 - 83 | 1190811 Tunisia | UoN  |
| 1145 | 1145 | 1 | 356 PxW811 - 83 | 1190811 Tunisia | UoN  |
| 2    | 2    | 3 | 357 PxW811 - 84 | 1190811 Tunisia | UoN  |
| 632  | 632  | 2 | 357 PxW811 - 84 | 1190811 Tunisia | UoN  |
| 1028 | 1028 | 1 | 357 PxW811 - 84 | 1190811 Tunisia | UoN  |
| 335  | 335  | 2 | 358 PxW811 - 90 | 1190811 Tunisia | UoN  |
| 607  | 607  | 3 | 358 PxW811 - 90 | 1190811 Tunisia | UoN  |
| 778  | 778  | 1 | 358 PxW811 - 90 | 1190811 Tunisia | UoN  |
| 437  | 437  | 1 | 359 PxW811 - 96 | 1190811 Tunisia | UoN  |
| 605  | 605  | 3 | 359 PxW811 - 96 | 1190811 Tunisia | UoN  |
| 987  | 987  | 2 | 359 PxW811 - 96 | 1190811 Tunisia | UoN  |
|      |      |   | PxW216 - 3      |                 | Rres |
|      |      |   | PxW216 - 30     |                 | Rres |
|      |      |   | PxW216 - 4      |                 | Rres |
|      |      |   | PxW216 - 45     |                 | Rres |
|      |      |   | PxW216 - 48     |                 | Rres |
|      |      |   | PxW216 - 74     |                 | Rres |
|      |      |   | PxW216 - 76     |                 | Rres |
|      |      |   | PxW216 - 81     |                 | Rres |
|      |      |   | PxW216 - 85     |                 | Rres |
|      |      |   | PxW216 - 88     |                 | Rres |
|      |      |   | PxW216 - 89     |                 | Rres |
|      |      |   | PxW216 - 92     |                 | Rres |
|      |      |   | PxW216 - 94     |                 | Rres |
|      |      |   | PxW223 - 1      |                 | Rres |
|      |      |   | PxW223 - 2      |                 | Rres |
|      |      |   | PxW223 - 25     |                 | Rres |
|      |      |   | PxW223 - 3      |                 | Rres |
|      |      |   | PxW223 - 80     |                 | Rres |
|      |      |   | PxW223 - 83     |                 | Rres |
|      |      |   | PxW223 - 85     |                 | Rres |
|      |      |   | PxW223 - 86     |                 | Rres |
|      |      |   | PxW223 - 89     |                 | Rres |

|             |      |
|-------------|------|
| PxW223 - 90 | Rres |
| PxW223 - 91 | Rres |
| PxW223 - 92 | Rres |
| PxW223 - 94 | Rres |
| PxW254 - 2  | Rres |
| PxW254 - 24 | Rres |
| PxW254 - 3  | Rres |
| PxW254 - 39 | Rres |
| PxW254 - 40 | Rres |
| PxW254 - 52 | Rres |
| PxW254 - 55 | Rres |
| PxW254 - 59 | Rres |
| PxW254 - 69 | Rres |
| PxW254 - 74 | Rres |
| PxW254 - 76 | Rres |
| PxW254 - 84 | Rres |
| PxW254 - 87 | Rres |
| PxW264 - 10 | Rres |
| PxW264 - 12 | Rres |
| PxW264 - 16 | Rres |
| PxW264 - 17 | Rres |
| PxW264 - 31 | Rres |
| PxW264 - 33 | Rres |
| PxW264 - 41 | Rres |
| PxW264 - 47 | Rres |
| PxW264 - 50 | Rres |
| PxW264 - 51 | Rres |
| PxW264 - 52 | Rres |
| PxW264 - 86 | Rres |
| PxW264 - 9  | Rres |
| PxW273 - 11 | Rres |
| PxW273 - 15 | Rres |
| PxW273 - 19 | Rres |



|             |      |
|-------------|------|
| PxW273 - 21 | Rres |
| PxW273 - 26 | Rres |
| PxW273 - 35 | Rres |
| PxW273 - 45 | Rres |
| PxW273 - 52 | Rres |
| PxW273 - 58 | Rres |
| PxW273 - 71 | Rres |
| PxW273 - 79 | Rres |
| PxW273 - 81 | Rres |
| PxW273 - 87 | Rres |
| PxW291 - 12 | Rres |
| PxW291 - 13 | Rres |
| PxW291 - 23 | Rres |
| PxW291 - 25 | Rres |
| PxW291 - 35 | Rres |
| PxW291 - 39 | Rres |
| PxW291 - 45 | Rres |
| PxW291 - 47 | Rres |
| PxW291 - 50 | Rres |
| PxW291 - 51 | Rres |
| PxW291 - 74 | Rres |
| PxW291 - 75 | Rres |
| PxW291 - 8  | Rres |
| PxW299 - 14 | Rres |
| PxW299 - 17 | Rres |
| PxW299 - 20 | Rres |
| PxW299 - 31 | Rres |
| PxW299 - 34 | Rres |
| PxW299 - 40 | Rres |
| PxW299 - 47 | Rres |
| PxW299 - 51 | Rres |
| PxW299 - 63 | Rres |
| PxW299 - 68 | Rres |

|             |      |
|-------------|------|
| PxW299 - 69 | Rres |
| PxW299 - 78 | Rres |
| PxW299 - 87 | Rres |
| PxW32 - 27  | Rres |
| PxW32 - 29  | Rres |
| PxW32 - 50  | Rres |
| PxW32 - 56  | Rres |
| PxW32 - 57  | Rres |
| PxW32 - 60  | Rres |
| PxW32 - 61  | Rres |
| PxW32 - 62  | Rres |
| PxW32 - 66  | Rres |
| PxW32 - 76  | Rres |
| PxW32 - 8   | Rres |
| PxW32 - 81  | Rres |
| PxW349 - 10 | Rres |
| PxW349 - 16 | Rres |
| PxW349 - 19 | Rres |
| PxW349 - 22 | Rres |
| PxW349 - 28 | Rres |
| PxW349 - 31 | Rres |
| PxW349 - 42 | Rres |
| PxW349 - 46 | Rres |
| PxW349 - 58 | Rres |
| PxW349 - 65 | Rres |
| PxW349 - 66 | Rres |
| PxW349 - 7  | Rres |
| PxW349 - 72 | Rres |
| PxW396 - 12 | Rres |
| PxW396 - 19 | Rres |
| PxW396 - 30 | Rres |
| PxW396 - 37 | Rres |
| PxW396 - 46 | Rres |

|             |      |
|-------------|------|
| PxW396 - 48 | Rres |
| PxW396 - 49 | Rres |
| PxW396 - 5  | Rres |
| PxW396 - 51 | Rres |
| PxW396 - 56 | Rres |
| PxW396 - 60 | Rres |
| PxW396 - 62 | Rres |
| PxW396 - 73 | Rres |
| PxW397 - 20 | Rres |
| PxW397 - 26 | Rres |
| PxW397 - 33 | Rres |
| PxW397 - 48 | Rres |
| PxW397 - 50 | Rres |
| PxW397 - 51 | Rres |
| PxW397 - 61 | Rres |
| PxW397 - 76 | Rres |
| PxW397 - 80 | Rres |
| PxW397 - 82 | Rres |
| PxW397 - 83 | Rres |
| PxW397 - 88 | Rres |
| PxW397 - 89 | Rres |
| PxW398 - 18 | Rres |
| PxW398 - 21 | Rres |
| PxW398 - 41 | Rres |
| PxW398 - 42 | Rres |
| PxW398 - 44 | Rres |
| PxW398 - 49 | Rres |
| PxW398 - 55 | Rres |
| PxW398 - 56 | Rres |
| PxW398 - 60 | Rres |
| PxW398 - 63 | Rres |
| PxW398 - 74 | Rres |
| PxW398 - 81 | Rres |

|             |      |
|-------------|------|
| PxW398 - 85 | Rres |
| PxW42 - 14  | Rres |
| PxW42 - 17  | Rres |
| PxW42 - 18  | Rres |
| PxW42 - 22  | Rres |
| PxW42 - 33  | Rres |
| PxW42 - 34  | Rres |
| PxW42 - 45  | Rres |
| PxW42 - 60  | Rres |
| PxW42 - 68  | Rres |
| PxW42 - 75  | Rres |
| PxW42 - 90  | Rres |
| PxW42 - 91  | Rres |
| PxW42 - 93  | Rres |
| PxW420 - 1  | Rres |
| PxW420 - 10 | Rres |
| PxW420 - 11 | Rres |
| PxW420 - 21 | Rres |
| PxW420 - 22 | Rres |
| PxW420 - 25 | Rres |
| PxW420 - 3  | Rres |
| PxW420 - 31 | Rres |
| PxW420 - 32 | Rres |
| PxW420 - 37 | Rres |
| PxW420 - 67 | Rres |
| PxW420 - 8  | Rres |
| PxW420 - 94 | Rres |
| PxW546 - 12 | Rres |
| PxW546 - 15 | Rres |
| PxW546 - 16 | Rres |
| PxW546 - 20 | Rres |
| PxW546 - 24 | Rres |
| PxW546 - 25 | Rres |

|             |      |
|-------------|------|
| PxW546 - 27 | Rres |
| PxW546 - 29 | Rres |
| PxW546 - 3  | Rres |
| PxW546 - 32 | Rres |
| PxW546 - 38 | Rres |
| PxW546 - 47 | Rres |
| PxW546 - 8  | Rres |
| PxW566 - 12 | Rres |
| PxW566 - 14 | Rres |
| PxW566 - 17 | Rres |
| PxW566 - 20 | Rres |
| PxW566 - 21 | Rres |
| PxW566 - 23 | Rres |
| PxW566 - 24 | Rres |
| PxW566 - 35 | Rres |
| PxW566 - 50 | Rres |
| PxW566 - 52 | Rres |
| PxW566 - 7  | Rres |
| PxW566 - 72 | Rres |
| PxW566 - 92 | Rres |
| PxW685 - 1  | Rres |
| PxW685 - 12 | Rres |
| PxW685 - 16 | Rres |
| PxW685 - 22 | Rres |
| PxW685 - 36 | Rres |
| PxW685 - 41 | Rres |
| PxW685 - 44 | Rres |
| PxW685 - 55 | Rres |
| PxW685 - 6  | Rres |
| PxW685 - 7  | Rres |
| PxW685 - 80 | Rres |
| PxW685 - 88 | Rres |
| PxW685 - 9  | Rres |

|             |      |
|-------------|------|
| PxW7 - 15   | Rres |
| PxW7 - 18   | Rres |
| PxW7 - 2    | Rres |
| PxW7 - 29   | Rres |
| PxW7 - 3    | Rres |
| PxW7 - 32   | Rres |
| PxW7 - 47   | Rres |
| PxW7 - 60   | Rres |
| PxW7 - 71   | Rres |
| PxW7 - 76   | Rres |
| PxW7 - 77   | Rres |
| PxW7 - 87   | Rres |
| PxW811 - 10 | Rres |
| PxW811 - 26 | Rres |
| PxW811 - 28 | Rres |
| PxW811 - 30 | Rres |
| PxW811 - 42 | Rres |
| PxW811 - 50 | Rres |
| PxW811 - 56 | Rres |
| PxW811 - 59 | Rres |
| PxW811 - 60 | Rres |
| PxW811 - 83 | Rres |
| PxW811 - 84 | Rres |
| PxW811 - 90 | Rres |
| PxW811 - 96 | Rres |

and Rothamsted sites in 2015-16.

| Year! | Fe_mg_kg <sup>-1</sup> | Zn_mg_kg <sup>-1</sup> | Straw_N%    | Grain_N%    | Gprot%      | TGW_g | GYD_t ha <sup>-1</sup> _85% DM |
|-------|------------------------|------------------------|-------------|-------------|-------------|-------|--------------------------------|
| 2016  | 40.45277297            | 33.50241283            | 1.148612866 | 2.71724434  | 15.48829274 | 29.3  | 4.747717647                    |
| 2016  | 40.72299305            | 40.35900601            | 1.145420048 | 2.278334557 | 12.98650697 | 30.8  | 5.325105882                    |
| 2016  | 40.80268207            | 38.30220382            | 1.645166865 | 3.331963602 | 18.99219253 | 28.95 | 3.407352941                    |
| 2016  | 30.05306265            | 22.42331648            | 1.451820523 | 3.055289567 | 17.41515053 | 37.55 | 5.904811765                    |
| 2016  | 37.20404747            | 23.11605976            | 1.868054306 | 2.866368805 | 16.33830219 | 31.8  | 4.498023529                    |
| 2016  | 36.67044798            | 32.12836234            | 1.279685411 | 3.504888427 | 19.97786403 | 38.85 | 4.172235294                    |
| 2016  | 37.20480506            | 27.66443987            | 1.3719857   | 2.035860105 | 11.6044026  | 35.8  | 5.719929412                    |
| 2016  | 43.68787172            | 43.08664601            | 1.062203531 |             |             | 34.65 | 5.553035294                    |
| 2016  | 43.91571391            | 29.36570169            | 1.869649447 | 3.016741355 | 17.19542572 | 36.95 |                                |
| 2016  | 34.94585503            | 28.36714685            | 1.106561621 | 3.093753596 | 17.6343955  | 38.9  | 5.686588235                    |
| 2016  | 44.17630308            | 31.62923201            | 1.895848694 | 2.351745462 | 13.40494914 | 35.65 | 4.668188235                    |
| 2016  | 31.32804775            | 28.99096868            | 1.709414776 | 2.71660503  | 15.48464867 | 37.35 | 6.032282353                    |
| 2016  | 36.42059395            | 27.80467796            | 1.124251913 | 2.450193203 | 13.96610126 | 39.9  | 5.114352941                    |
| 2016  | 28.5158976             | 27.40232372            | 1.0239401   | 2.621137987 | 14.94048653 | 39.3  | 4.951623529                    |
| 2016  | 39.3448135             | 28.55157297            | 1.607223581 | 1.987085954 | 11.32638994 | 35.45 | 5.340447059                    |
| 2016  | 38.99240706            | 43.48562061            | 1.057055591 | 2.703812837 | 15.41173317 | 37.5  | 3.983823529                    |
| 2016  | 47.28687155            | 46.27500198            | 1.466865906 | 3.243124395 | 18.48580905 | 34.4  | 3.778823529                    |
| 2016  | 35.94444124            | 50.15397527            | 1.863951323 | 3.200181345 | 18.24103367 | 36.8  | 3.693717647                    |
| 2016  | 37.62033275            | 34.5023377             | 1.231864964 | 3.073328139 | 17.51797039 | 33.7  | 5.279835294                    |
| 2016  | 42.88009998            | 32.9288662             | 1.447197798 | 3.125406548 | 17.81481732 | 33.3  | 4.410352941                    |
| 2016  | 32.80200931            | 42.71117004            | 1.669622139 | 2.72724481  | 15.54529542 |       | 4.759411765                    |
| 2016  | 28.36273929            | 25.85153871            | 1.643933154 | 2.475347685 | 14.1094818  | 35.55 | 4.762352941                    |
| 2016  | 33.99033439            | 27.33382143            | 1.440767108 | 2.427490207 | 13.83669418 | 34.34 | 5.974023529                    |
| 2016  | 29.71155697            | 23.31260522            | 1.878552865 | 2.853318254 | 16.26391405 | 33.15 | 3.306                          |
| 2016  | 30.87851787            | 31.97126135            | 1.498807976 | 3.028331327 | 17.26148856 | 34.85 | 6.035294118                    |
| 2016  | 38.46817122            | 33.27332534            | 1.021009999 | 0.697620303 | 3.976435725 | 30.5  | 3.944470588                    |
| 2016  | 37.72201022            | 36.74990739            | 1.587406927 | 3.017406524 | 17.19921719 | 34.9  | 5.691505882                    |
| 2016  | 54.04465631            | 38.60471014            | 1.676037928 | 3.137432868 | 17.88336735 | 36.86 | 4.926                          |
| 2016  | 48.36297453            | 43.98433619            | 2.55183072  | 2.921831466 | 16.65443936 | 37.45 | 3.582117647                    |
| 2016  | 54.19679135            | 57.34070016            | 1.552416743 | 2.86837023  | 16.34971031 |       | 3.644235294                    |
| 2016  | 39.49363049            | 33.87158652            | 1.326349102 | 3.137220785 | 17.88215847 | 35.15 | 4.952941176                    |

|      |             |             |             |             |             |       |             |
|------|-------------|-------------|-------------|-------------|-------------|-------|-------------|
| 2016 | 40.22212029 | 41.43533387 | 1.138471093 | 2.642951851 | 15.06482555 | 33.68 | 4.629141176 |
| 2016 | 40.96611098 | 28.95247152 | 1.475581009 | 2.848282099 | 16.23520797 | 32.4  | 6.708       |
| 2016 | 29.69206035 | 23.19548767 | 1.564617838 | 2.731401219 | 15.56898695 | 31.9  | 5.072941176 |
| 2016 | 35.81250562 | 31.98161957 | 1.364474385 | 2.84563595  | 16.22012491 | 35.45 | 4.761858824 |
| 2016 | 44.32422369 | 33.9190386  | 1.334618243 | 2.705102149 | 15.41908225 | 32.45 | 4.420705882 |
| 2016 | 22.82786018 | 25.64946531 | 1.820499194 | 3.2865998   | 18.73361886 | 31.3  | 4.267670588 |
| 2016 | 30.69578218 | 29.07722517 | 1.205705176 | 2.763312045 | 15.75087866 | 31.6  | 3.447529412 |
| 2016 | 40.0671584  | 35.73610251 | 1.486374626 | 2.354873282 | 13.4227777  | 29.1  | 2.970823529 |
| 2016 | 32.10268113 | 30.51165183 | 1.098455309 | 2.760269922 | 15.73353856 | 30.54 | 3.627294118 |
| 2016 | 36.88794576 | 33.00128536 | 1.483663499 | 3.103838435 | 17.69187908 | 26.4  |             |
| 2016 | 31.82309539 | 38.39310669 | 2.176462259 | 3.051160248 | 17.39161341 | 30.15 | 2.536470588 |
| 2016 | 30.38331285 | 25.03930201 | 0.873758123 | 2.660203004 | 15.16315712 | 34.6  | 5.103294118 |
| 2016 | 32.17136469 | 26.32217822 | 1.631779074 | 2.719704439 | 15.5023153  | 30.7  | 3.434352941 |
| 2016 | 44.84843233 | 37.36501082 | 0.850132532 | 2.579008378 | 14.70034776 | 34.75 | 3.83        |
| 2016 | 54.2055401  | 41.64629346 | 1.391703716 | 3.390926226 | 19.32827949 | 32.95 | 4.298176471 |
| 2016 | 30.3770068  | 24.4526146  | 1.378421813 | 3.125408981 | 17.81483119 | 34.65 |             |
| 2016 | 32.16145136 | 29.73137005 | 1.436419769 | 2.923508127 | 16.66399632 | 35.05 | 3.561764706 |
| 2016 | 35.64171278 | 24.80544107 | 1.544006593 | 2.885106839 | 16.44510898 | 32.45 | 7.486117647 |
| 2016 | 30.93624975 | 36.82596204 | 0.844815662 | 2.856522658 | 16.28217915 | 33.84 | 5.381623529 |
| 2016 | 28.87797403 | 34.77561781 | 1.505418977 | 2.942849417 | 16.77424168 | 34    | 4.255058824 |
| 2016 | 32.1860807  | 26.66585544 | 1.930377093 | 2.751763474 | 15.6850518  | 32.25 | 3.509647059 |
| 2016 | 36.15759954 | 32.04970611 | 1.54816699  | 3.030183913 | 17.27204831 | 30.66 | 4.638117647 |
| 2016 | 34.90213265 | 25.84407056 | 1.495954816 | 2.612024276 | 14.88853838 | 30.1  | 3.064470588 |
| 2016 | 37.81333077 | 35.33473159 | 1.318473465 | 2.290286165 | 13.05463114 | 38.25 | 3.636941176 |
| 2016 |             |             | 1.383416182 | 2.594773437 | 14.79020859 | 32    | 2.660705882 |
| 2016 | 50.60009806 | 47.35605187 | 1.178187767 | 2.839334046 | 16.18420406 | 36.7  | 3.012705882 |
| 2016 | 30.44212822 | 28.29961161 | 1.252153817 | 2.491869329 | 14.20365517 | 34.8  | 6.280235294 |
| 2016 | 34.91874301 | 29.47344024 | 1.414907574 | 2.321765373 | 13.23406263 | 32.85 | 5.651670588 |
| 2016 | 32.57454261 | 23.34251122 | 1.653308242 | 1.962303888 | 11.18513216 | 32.6  | 4.556647059 |
| 2016 | 34.51359502 | 36.12543277 | 1.754729355 | 2.486820904 | 14.17487915 | 34.95 | 3.250823529 |
| 2016 | 41.94162488 | 49.63259153 | 1.269772382 | 3.214435172 | 18.32228048 | 33.46 | 3.754729412 |
| 2016 | 24.66802116 | 38.93698592 | 1.158905001 | 3.382998043 | 19.28308884 | 31.35 | 5.083294118 |
| 2016 | 28.27191562 | 24.85198143 | 2.054008658 | 2.362664057 | 13.46718512 | 32.25 |             |



|      |             |             |             |             |             |       |             |
|------|-------------|-------------|-------------|-------------|-------------|-------|-------------|
| 2016 | 34.95712621 | 28.30316249 | 1.529721389 | 3.278263594 | 18.68610249 | 31.1  | 5.041835294 |
| 2016 | 37.29907382 | 34.57884006 | 1.504222598 | 2.640817632 | 15.0526605  | 32.1  | 4.774517647 |
| 2016 | 31.60088812 | 28.1182623  | 1.084257976 | 2.563766352 | 14.61346821 | 35.3  | 5.251152941 |
| 2016 | 22.42262696 | 23.90249231 | 1.076354949 | 2.639486624 | 15.04507376 | 33.35 | 4.054258824 |
| 2016 | 34.5276897  | 21.48860317 | 2.100006947 | 2.743938682 | 15.64045049 | 30.05 | 6.281305882 |
| 2016 | 36.16791597 | 27.96609808 | 1.31424901  | 2.735286105 | 15.5911308  | 34.05 | 5.659294118 |
| 2016 | 34.31413966 | 36.58807328 | 1.366963607 | 2.331849213 | 13.29154051 | 30.65 | 5.039576471 |
| 2016 | 34.21848261 | 34.33413171 | 1.189062197 | 3.035751166 | 17.30378165 | 36.05 | 4.318964706 |
| 2016 | 33.37405587 | 20.14130625 | 1.142518729 | 2.486411464 | 14.17254534 | 34.85 | 2.575764706 |
| 2016 | 37.26113583 | 30.98820463 | 1.224189234 | 3.006763282 | 17.13855071 | 35.4  | 3.406117647 |
| 2016 | 37.95926978 | 46.67179666 | 1.484089546 | 1.961150384 | 11.17855719 | 36.2  | 3.023058824 |
| 2016 | 35.386557   | 38.34592593 | 1.098284299 | 2.521649142 | 14.37340011 | 39.55 | 3.308282353 |
| 2016 | 37.52697421 | 43.76327703 | 1.494953939 | 3.028764477 | 17.26395752 | 39.2  | 3.861647059 |
| 2016 | 31.03692039 | 30.52188873 | 1.319378891 | 3.431512125 | 19.55961911 | 34.95 | 2.909176471 |
| 2016 | 32.65310149 | 29.09784048 | 1.474757896 | 3.162892742 | 18.02848863 | 34.05 | 4.370117647 |
| 2016 | 32.02496567 | 33.33943008 | 0.914336693 | 2.863606905 | 16.32255936 | 37.35 | 3.965176471 |
| 2016 | 33.10276171 | 26.01842271 | 1.080031023 | 1.851218108 | 10.55194322 | 35.8  | 3.447529412 |
| 2016 | 22.08584    | 21.92375185 | 1.193605565 | 2.115729072 | 12.05965571 | 33.55 | 4.833176471 |
| 2016 | 39.23224014 | 27.19132879 | 1.680847876 | 3.331354228 | 18.9887191  | 33.2  | 5.949741176 |
| 2016 | 37.14269484 | 32.55379039 | 1.751659344 | 3.05058602  | 17.38834032 | 36.5  | 6.059929412 |
| 2016 | 48.71040041 | 40.03841319 | 1.646694571 | 3.134532767 | 17.86683677 | 38.25 | 5.518117647 |
| 2016 | 38.22868186 | 32.37820754 | 1.334467652 | 3.411619356 | 19.44623033 | 38.95 | 5.904       |
| 2016 | 45.82005884 | 42.04180953 | 1.546152293 | 2.862708577 | 16.31743889 | 38.55 | 4.4574      |
| 2016 | 26.85659251 | 29.50438213 | 1.648165916 | 2.338538457 | 13.32966921 | 36.8  | 6.886741176 |
| 2016 | 29.00633771 | 38.38174994 | 1.347568595 | 2.657226371 | 15.14619031 | 36.3  | 4.576       |
| 2016 | 12.63733715 | 16.72978435 | 1.545592761 | 1.926507695 | 10.98109386 | 37.3  | 3.525129412 |
| 2016 | 21.01116056 | 23.30338667 | 1.217283721 | 2.051206951 | 11.69187962 | 33.9  | 3.294823529 |
| 2016 | 34.01917006 | 31.58030964 | 1.673501795 | 2.314835682 | 13.19456339 | 32.1  |             |
| 2016 | 35.45881084 | 29.67621674 | 2.370775324 | 3.042642606 | 17.34306285 | 33.64 | 3.230117647 |
| 2016 |             |             | 1.396810277 | 2.584746609 | 14.73305567 | 36.55 | 3.252705882 |
| 2016 | 10.15680085 | 19.39572622 | 1.233232528 | 3.281060474 | 18.7020447  | 35    | 3.872       |
| 2016 | 28.66703397 | 28.97375583 | 1.523627788 | 2.703597149 | 15.41050375 |       | 2.878117647 |
| 2016 | 37.09128579 | 29.11400058 | 1.317377202 | 3.318614549 | 18.91610293 | 39    | 4.125882353 |

|      |             |             |             |             |             |       |             |
|------|-------------|-------------|-------------|-------------|-------------|-------|-------------|
| 2016 | 39.80474671 | 28.49162879 | 1.313557254 | 2.704398962 | 15.41507408 | 41    | 3.518776471 |
| 2016 | 33.02188555 | 39.3669907  | 1.470264413 | 3.469490291 | 19.77609466 | 40.68 | 4.141176471 |
| 2016 | 32.08995604 | 22.06805504 | 1.661403111 | 2.134685574 | 12.16770777 | 36.5  |             |
| 2016 | 38.73216913 | 33.14863398 | 1.326624307 | 2.850454829 | 16.24759253 | 33.3  | 3.975858824 |
| 2016 | 36.68570166 | 30.46920895 |             | 3.115616943 | 17.75901657 | 35.64 | 3.054117647 |
| 2016 | 35.3710474  | 31.3523269  | 0.907929334 | 2.390513648 | 13.62592779 | 36.65 | 4.138588235 |
| 2016 | 33.12041424 | 30.64065204 | 1.629980774 | 2.112991085 | 12.04404919 | 36.2  | 4.448294118 |
| 2016 | 35.80192624 | 31.39449125 | 2.239872755 | 3.170255168 | 18.07045446 | 33.7  |             |
| 2016 | 31.73093884 | 32.2207542  | 1.52711123  | 2.994622601 | 17.06934883 | 40.95 |             |
| 2016 | 33.5699055  | 34.7221777  | 1.432188124 | 3.85894609  | 21.99599271 | 42.3  | 4.717411765 |
| 2016 | 34.67025313 | 27.61555907 | 1.373197099 | 2.204712823 | 12.56686309 | 38    | 4.155105882 |
| 2016 | 19.72979642 | 25.58238516 | 1.322697058 | 2.373299242 | 13.52780568 | 32.85 | 3.657047059 |
| 2016 | 28.31536018 | 30.58233703 | 1.670186943 | 2.522055105 | 14.3757141  | 34.5  | 4.151529412 |
| 2016 | 30.52132429 | 32.16859842 | 2.205937203 | 2.828907921 | 16.12477515 | 31.95 | 5.083294118 |
| 2016 | 34.54206348 | 27.52876808 | 1.415754254 | 2.872277411 | 16.37198125 | 35.2  | 5.116011765 |
| 2016 | 41.70909171 | 38.72899397 | 0.933160413 | 2.78011964  | 15.84668195 | 34.15 | 3.406117647 |
| 2016 | 44.45913251 | 41.48945941 | 1.115340503 | 2.595230216 | 14.79281223 | 33.55 | 6.008141176 |
| 2016 | 34.5222257  | 33.21484982 | 1.35246636  | 2.737761379 | 15.60523986 | 35.75 |             |
| 2016 | 36.23333922 | 33.39906441 | 1.514045145 | 2.339822573 | 13.33698867 | 34.85 | 5.295435294 |
| 2016 | 30.11844829 | 20.926135   | 0.87866724  | 2.726427184 | 15.54063495 | 31.85 | 4.294470588 |
| 2016 | 42.39996203 | 33.45155475 | 1.409357433 |             |             | 28.75 | 5.034211765 |
| 2016 | 39.9171422  | 40.2161738  | 1.445893247 | 2.969341723 | 16.92524782 | 30.68 | 3.921317647 |
| 2016 | 29.69828967 | 23.61036307 | 1.586839905 | 2.575713003 | 14.68156412 | 32.9  | 3.085176471 |
| 2016 |             |             | 1.413301572 | 2.583370384 | 14.72521119 | 29.65 | 4.329223529 |
| 2016 | 35.45748844 | 31.76422936 | 1.384137158 | 2.87973583  | 16.41449423 | 34.7  | 5.1646      |
| 2016 | 27.60839246 | 24.70251553 | 1.634656832 | 2.931342527 | 16.7086524  | 34.45 | 3.902823529 |
| 2016 | 34.31437651 | 26.86724487 | 1.296078806 | 3.013889961 | 17.17917278 | 31.35 | 5.155623529 |
| 2016 | 43.59796066 | 33.80380912 | 1.564226592 | 3.031746879 | 17.28095721 | 31.8  | 3.002352941 |
| 2016 | 40.23982998 | 25.84095469 | 1.743509688 | 2.84062735  | 16.19157589 |       | 3.830588235 |
| 2016 | 34.82664044 | 28.83409189 | 1.335676296 | 2.854891593 | 16.27288208 | 32.25 | 5.113576471 |
| 2016 | 41.86896629 | 29.23191222 | 1.363641741 | 3.031862095 | 17.28161394 | 29.2  | 4.908341176 |
| 2016 | 36.28872613 | 27.35097487 | 1.212075563 | 2.803478003 | 15.97982462 | 31.6  | 3.654588235 |
| 2016 |             | 37.09040761 | 2.172837514 | 3.088593545 | 17.60498321 | 35.75 | 4.146352941 |

|      |             |             |             |             |             |       |             |
|------|-------------|-------------|-------------|-------------|-------------|-------|-------------|
| 2016 | 30.03775175 | 33.35186941 | 1.070537413 | 2.770461845 | 15.79163252 | 34.48 | 2.913894118 |
| 2016 | 35.82763436 | 30.55068631 | 2.027083769 | 3.320559264 | 18.92718781 | 32.4  |             |
| 2016 | 31.46017951 | 32.01153685 | 1.311513524 | 3.011777193 | 17.16713    | 32.85 | 4.487152941 |
| 2016 | 42.91173254 | 44.60353979 | 1.237570438 | 2.65845695  | 15.15320462 | 32.15 | 4.613929412 |
| 2016 | 47.39761051 | 29.58728698 | 1.412269158 | 3.275000076 | 18.66750043 | 35.1  | 5.158588235 |
| 2016 | 30.26987844 | 26.67550405 | 1.156473833 | 2.344820327 | 13.36547587 | 39.65 | 2.339764706 |
| 2016 | 40.66425233 | 37.40810229 | 1.357408308 | 3.239462006 | 18.46493343 | 34.05 | 2.702117647 |
| 2016 | 40.95108354 | 43.55538819 | 1.467664591 | 3.040601261 | 17.33142719 | 37.6  | 4.099764706 |
| 2016 | 64.74930194 | 54.96726575 | 1.285569579 |             |             | 33.5  | 4.92        |
| 2016 | 42.08220301 | 35.60659646 | 0.90302554  | 2.651497521 | 15.11353587 | 36.25 | 5.440729412 |
| 2016 | 33.54170498 | 28.72025624 | 1.879588027 | 3.457831096 | 19.70963725 | 35    | 3.965176471 |
| 2016 | 31.72894494 | 30.1267463  | 1.080166026 | 3.211000735 | 18.30270419 | 30.7  | 4.408705882 |
| 2016 | 39.84934468 | 28.25901885 | 1.747189954 | 2.871535936 | 16.36775483 | 31.35 |             |
| 2016 | 28.80118464 | 28.35735725 | 1.484631732 | 2.433612066 | 13.87158877 | 32.3  | 3.189741176 |
| 2016 | 28.26556087 | 30.56139856 | 1.056073157 | 2.505721796 | 14.28261424 | 38.4  | 4.6116      |
| 2016 | 60.3543207  | 60.12607312 | 1.004641332 | 2.709728494 | 15.44545241 | 35.8  | 5.712164706 |
| 2016 | 33.24967787 | 31.47779564 | 1.253442533 | 2.368512469 | 13.50052107 | 35.45 | 7.16        |
| 2016 | 38.04691764 | 30.50563337 | 1.219935462 | 3.033165208 | 17.28904168 | 36.95 | 3.962164706 |
| 2016 | 43.48564453 | 38.70363594 |             | 0.184182977 | 1.049842968 | 32.6  | 6.129317647 |
| 2016 | 35.37734881 | 39.19983012 | 1.805269258 | 2.373328133 | 13.52797036 | 38.2  | 4.627764706 |
| 2016 | 25.57519564 | 17.76727035 | 1.815528851 | 2.777262911 | 15.83039859 | 26.35 | 3.919305882 |
| 2016 | 29.86994985 | 35.3889944  | 1.022474127 | 2.659134143 | 15.15706462 | 26.3  |             |
| 2016 | 35.43130671 | 33.8415009  | 1.721602782 |             |             | 26    | 2.619294118 |
| 2016 | 41.18721843 | 37.44717705 | 1.28609956  | 2.863989245 | 16.3247387  | 30.2  |             |
| 2016 | 26.45302159 | 23.7170768  | 1.743181123 | 3.012270673 | 17.16994283 | 31.1  | 4.068705882 |
| 2016 | 27.70193877 | 29.97447464 | 1.878671666 | 2.357309447 | 13.43666385 | 32.45 | 4.058352941 |
| 2016 | 35.11330535 | 25.02211722 | 2.322454921 | 2.327482673 | 13.26665123 | 32.75 | 7.698352941 |
| 2016 | 23.74014987 | 18.77126219 | 1.598330592 | 2.847511831 | 16.23081743 | 32.85 | 6.804494118 |
| 2016 | 28.3952181  | 35.26744923 | 1.417003609 | 2.820725066 | 16.07813288 | 34.65 | 4.5396      |
| 2016 | 36.25714228 | 33.70055185 | 1.661522102 | 2.391838747 | 13.63348086 | 35.75 | 6.187694118 |
| 2016 | 30.53720575 | 24.72168479 | 1.867401838 | 2.978369156 | 16.97670419 | 34.1  | 4.406411765 |
| 2016 | 37.10358154 | 34.81570363 | 1.335361498 | 2.889548703 | 16.4704276  | 31.3  | 4.845176471 |
| 2016 | 38.23330753 | 29.69186798 | 1.758737237 |             |             | 24.15 | 7.478941176 |

|      |             |             |             |             |             |       |             |
|------|-------------|-------------|-------------|-------------|-------------|-------|-------------|
| 2016 | 39.95938772 | 28.82291836 | 1.751882373 | 2.698283519 | 15.38021606 | 29.8  | 3.536682353 |
| 2016 | 29.70570247 | 21.09846927 | 0.964182599 | 2.918393608 | 16.63484357 | 28.45 | 4.167494118 |
| 2016 | 34.583701   | 25.95141104 | 1.482553506 | 2.562127745 | 14.60412815 | 31.75 | 4.327529412 |
| 2016 | 36.48004375 | 26.58692847 | 1.231027765 | 2.614259077 | 14.90127674 | 31.1  | 5.573035294 |
| 2016 | 49.14029404 | 34.57331988 | 2.087601764 | 2.366353846 | 13.48821692 | 33.35 | 4.524235294 |
| 2016 | 26.26836613 | 23.85602301 | 1.571371551 | 2.802706042 | 15.97542444 | 28.55 | 4.299858824 |
| 2016 | 31.86696745 | 22.03880039 | 1.700236677 | 2.713121818 | 15.46479437 | 32.65 | 3.662764706 |
| 2016 | 25.08929015 | 27.78131807 | 1.779052674 |             |             | 32.25 | 6.087411765 |
| 2016 | 32.15121798 | 30.93175746 | 1.271745863 | 2.868429859 | 16.3500502  | 30.1  | 4.997176471 |
| 2016 | 35.74054594 | 28.61279066 | 1.427275635 | 2.372457802 | 13.52300947 | 31.5  | 3.064470588 |
| 2016 | 34.87004451 | 26.63759091 | 1.473945585 | 2.682840868 | 15.29219295 | 32.75 | 3.934117647 |
| 2016 | 47.85165466 | 30.59719747 | 1.892095817 | 2.784796571 | 15.87334045 | 31.3  | 4.066835294 |
| 2016 | 36.19555706 | 41.99005017 | 1.813571255 | 3.175726109 | 18.10163882 | 31.75 |             |
| 2016 | 41.55655157 | 29.93759925 | 1.621684987 | 2.304805398 | 13.13739077 | 29.45 | 3.965176471 |
| 2016 | 40.82360297 | 34.24461818 | 1.449809822 | 2.19023227  | 12.48432394 | 31.7  | 3.830929412 |
| 2016 | 49.43361148 | 40.54824449 | 1.631783067 | 2.258665206 | 12.87439168 | 30.46 | 4.955011765 |
| 2016 | 36.82412159 | 32.35731615 | 1.544263723 | 3.095262128 | 17.64299413 | 28.2  | 4.244705882 |
| 2016 | 30.88813781 | 30.53995189 | 1.981589429 | 2.595901094 | 14.79663624 | 32.65 | 7.203011765 |
| 2016 | 45.80183947 | 41.4863209  | 1.592405177 | 2.427694235 | 13.83785714 | 31.9  | 5.546894118 |
| 2016 | 32.56529838 | 31.9920786  | 2.204815585 | 2.477114291 | 14.11955146 |       | 4.609129412 |
| 2016 | 26.71331382 | 23.94078919 | 1.665599659 | 2.923138971 | 16.66189213 | 29.4  | 6.392470588 |
| 2016 | 23.42020052 | 22.68204308 | 1.268943488 | 2.773875355 | 15.81108952 | 29.4  | 4.354729412 |
| 2016 | 33.63326667 | 38.87868662 | 1.793214337 | 2.761536981 | 15.74076079 | 30.3  | 5.083811765 |
| 2016 | 29.82249571 | 24.20006329 | 1.918778731 | 2.601708497 | 14.82973843 | 34.9  | 6.213705882 |
| 2016 | 31.27154674 | 18.86447161 | 1.445293569 | 2.364978632 | 13.4803782  | 34.45 | 7.413741176 |
| 2016 | 42.89668761 | 32.4751402  | 1.423670837 | 2.764115843 | 15.7554603  | 30.6  | 6.169976471 |
| 2016 | 24.34014325 | 27.76375723 | 1.516740974 | 2.971702765 | 16.93870576 | 32.1  | 2.766705882 |
| 2016 | 30.24723168 | 32.37066679 | 1.500499314 |             |             | 34.25 | 3.922941176 |
| 2016 | 33.81262855 | 38.1519851  | 1.934085472 | 2.884136636 | 16.43957882 | 35.1  | 2.971294118 |
| 2016 | 56.3241863  | 41.70271792 | 1.54057386  | 2.644343687 | 15.07275902 | 34.15 | 6.781882353 |
| 2016 | 33.19545305 | 28.04508718 | 1.045109823 | 2.572984916 | 14.66601402 | 36.2  | 4.119317647 |
| 2016 | 36.42225032 | 33.8775238  | 1.354959566 | 2.285177496 | 13.02551172 | 37.5  | 3.733458824 |
| 2016 | 26.94151199 | 24.68048684 | 0.904882124 | 2.382953276 | 13.58283367 | 33.6  | 5.966752941 |

|      |             |             |             |             |             |       |             |
|------|-------------|-------------|-------------|-------------|-------------|-------|-------------|
| 2016 | 33.6525318  | 39.15096431 | 1.949374024 | 2.957946421 | 16.8602946  | 33.2  | 5.689905882 |
| 2016 | 37.8538472  | 23.50105476 | 1.431351576 | 2.600343761 | 14.82195944 | 33.8  | 4.988235294 |
| 2016 | 27.78324282 | 33.20381982 | 1.524057734 | 3.016208318 | 17.19238742 | 39.8  | 5.421647059 |
| 2016 | 35.87758191 | 40.77539986 | 2.131418314 | 3.269425966 | 18.635728   | 38.6  | 5.392705882 |
| 2016 | 33.62311123 | 30.94778345 | 0.745273119 | 2.585509793 | 14.73740582 | 39.65 | 6.366588235 |
| 2016 | 33.87680097 | 34.94036358 | 1.170507795 | 3.052159434 | 17.39730878 | 32.25 | 5.653176471 |
| 2016 | 26.53968344 | 29.59448307 | 1.873259263 | 2.644050065 | 15.07108537 | 32.8  | 5.167847059 |
| 2016 | 36.5240189  | 38.13242496 | 1.194631698 | 3.043108147 | 17.34571644 | 31.95 | 5.693294118 |
| 2016 | 36.14270593 | 29.93454531 | 1.430377028 | 3.482711411 | 19.85145505 | 29.95 | 4.987529412 |
| 2016 | 30.3780467  | 32.82651279 | 1.812258178 | 3.43378675  | 19.57258447 | 32.7  | 3.302588235 |
| 2016 | 32.55105708 | 31.6404598  | 1.657663003 |             |             | 31.8  |             |
| 2016 | 39.77384018 | 36.54138447 | 0.853835806 | 2.40296491  | 13.69689999 | 37.45 | 5.159858824 |
| 2016 | 32.90116173 | 36.11738735 | 1.253973542 | 2.947112892 | 16.79854348 | 35.4  | 4.317176471 |
| 2016 | 27.68773109 | 29.45314725 | 1.1706146   | 2.684350147 | 15.30079584 | 33.46 | 5.381741176 |
| 2016 | 44.2195423  | 39.78614461 | 1.455336826 | 2.909089271 | 16.58180884 | 32.25 | 5.296235294 |
| 2016 | 35.05661005 | 38.72082908 | 1.116564679 | 2.924324319 | 16.66864862 | 38.35 | 3.147294118 |
| 2016 | 29.12679829 | 34.50492988 | 1.198033215 | 2.639897582 | 15.04741622 | 36.8  | 3.8148      |
| 2016 |             |             | 1.655794672 | 2.407729789 | 13.7240598  | 38.3  | 3.326305882 |
| 2016 | 32.87317163 | 34.43610891 | 1.840699526 | 2.584406295 | 14.73111588 | 35.6  | 3.209411765 |
| 2016 | 46.10237792 | 36.26634877 | 1.529797456 | 3.633469855 | 20.71077817 | 37.7  |             |
| 2016 | 28.36107727 | 26.39740359 | 1.149039205 | 3.141699725 | 17.90768843 | 29.3  | 5.215435294 |
| 2016 | 35.87915407 | 32.86641943 | 1.469478093 |             |             | 29.35 | 4.016941176 |
| 2016 | 34.86779659 | 36.39694776 | 1.243497857 | 2.960240574 | 16.87337127 | 31.85 | 3.749282353 |
| 2016 | 45.98417131 | 36.85433546 | 1.305677813 | 3.137168056 | 17.88185792 | 36.25 | 5.662823529 |
| 2016 | 33.14469695 | 27.02037849 | 1.004643045 | 2.906101995 | 16.56478137 | 32.15 | 4.813882353 |
| 2016 | 30.65530468 | 27.9491237  | 1.304570457 | 3.026890722 | 17.25327712 | 33.4  | 5.653270588 |
| 2016 | 25.46298497 | 29.97120247 | 1.611008544 | 2.287780647 | 13.04034969 | 37.35 | 4.679529412 |
| 2016 | 34.44440304 | 23.62900195 | 1.574929176 | 2.651963954 | 15.11619454 | 36.6  | 5.207529412 |
| 2016 | 37.9536498  | 36.12818863 | 1.363709263 | 2.879826232 | 16.41500952 | 36.1  |             |
| 2016 | 33.81356064 | 27.73548258 | 1.755139512 | 2.705887372 | 15.42355802 | 40.45 | 5.083929412 |
| 2016 | 30.02546996 | 24.51897498 | 1.034847136 | 2.704657545 | 15.416548   | 39.8  | 5.493529412 |
| 2016 | 36.24265951 | 28.64098249 | 1.778237115 | 2.548992614 | 14.5292579  | 36.7  | 5.358458824 |
| 2016 | 33.8799015  | 26.05622675 | 0.956055163 | 2.721287742 | 15.51134013 | 34.7  | 4.533105882 |

|      |             |             |             |             |             |       |             |
|------|-------------|-------------|-------------|-------------|-------------|-------|-------------|
| 2016 | 39.34663696 | 27.92719315 | 0.916374318 | 3.007374699 | 17.14203578 | 30.55 | 7.537694118 |
| 2016 | 24.020866   | 19.97657676 | 1.553505149 | 2.68973814  | 15.3315074  | 31.45 | 4.058352941 |
| 2016 | 31.88333457 | 27.42104    | 1.433969258 | 2.14367065  | 12.21892271 | 30.25 | 7.008376471 |
| 2016 | 33.0953011  | 30.10752318 | 1.590867065 | 3.121713367 | 17.79376619 | 34.25 | 5.450705882 |
| 2016 | 30.30376903 | 39.55424754 | 1.195811214 | 2.888738787 | 16.46581109 | 33.46 | 7.093223529 |
| 2016 | 32.75634509 | 28.80070446 | 1.542219187 | 2.631426023 | 14.99912833 | 29.85 | 5.902094118 |
| 2016 | 32.60692966 | 27.01705427 | 1.444505238 | 2.789916422 | 15.90252361 | 31.65 | 3.033411765 |
| 2016 |             |             |             |             |             | 30.8  | 3.561411765 |
| 2016 | 35.75709073 | 32.30917601 | 1.773208773 | 2.102062109 | 11.98175402 | 33.9  | 5.875658824 |
| 2016 | 41.3775183  | 30.56510118 | 1.462836119 | 2.914330154 | 16.61168188 | 34.35 | 5.403635294 |
| 2016 | 41.56899906 | 35.90915642 | 0.862475558 | 3.485621205 | 19.86804087 | 31.35 | 5.385223529 |
| 2016 | 31.41621295 | 29.09260934 | 1.518383971 | 2.872938845 | 16.37575142 | 32.35 | 5.6406      |
| 2016 | 25.38615482 | 23.27808532 | 1.58954713  | 2.685790097 | 15.30900355 | 29.55 | 6.514635294 |
| 2016 | 39.16721005 | 42.02456175 | 1.448490835 | 2.842207738 | 16.20058411 | 27.05 | 4.694117647 |
| 2016 | 26.17103516 | 28.64919569 | 2.016331546 | 2.433105327 | 13.86870036 | 26.9  |             |
| 2016 | 32.37146852 | 25.12193293 | 1.822718879 | 2.052130006 | 11.69714104 | 27.1  | 5.692235294 |
| 2016 | 29.86865728 | 23.42169297 | 1.61620466  | 2.875201379 | 16.38864786 | 30.65 | 3.602823529 |
| 2016 | 30.43606315 | 26.49179299 | 1.570513381 | 3.218924439 | 18.3478693  | 29.1  | 4.936658824 |
| 2016 | 32.95189485 | 29.71335219 | 1.270800287 | 2.458348745 | 14.01258785 | 30.64 | 3.354352941 |
| 2016 | 29.60470182 | 35.03696395 | 0.893940732 | 0.25228131  | 1.438003468 | 30.5  | 4.141176471 |
| 2016 | 34.47666861 | 26.51151379 | 1.1879514   | 2.748567025 | 15.66683204 | 33.95 | 4.408705882 |
| 2016 | 40.53474413 | 35.9920622  | 1.554669543 | 3.23673384  | 18.44938289 | 34.4  | 4.244705882 |
| 2016 | 34.49906073 | 30.11065739 | 0.792683729 | 3.014342786 | 17.18175388 | 36.45 | 6.463058824 |
| 2016 |             |             | 1.45596586  | 2.381150888 | 13.57256006 | 32.8  | 5.389741176 |
| 2016 | 49.73895447 | 30.17644589 | 1.366958102 | 2.801611274 | 15.96918426 | 31.84 | 3.938141176 |
| 2016 | 31.85234709 | 27.3896489  | 1.204932955 | 2.493701843 | 14.21410051 | 30.56 | 5.363682353 |
| 2016 | 32.02523074 | 26.8814515  | 0.94853626  | 2.493618462 | 14.21362523 | 35.85 |             |
| 2016 | 38.40353967 | 37.18424427 | 1.305366403 |             |             | 30.4  | 4.335305882 |
| 2016 | 71.16176432 | 32.71600524 | 1.495051994 | 2.76008363  | 15.73247669 | 33.76 | 4.814117647 |
| 2016 | 37.44905328 | 29.56592435 | 1.239760291 | 2.22276809  | 12.66977811 | 31.25 | 5.474964706 |
| 2016 | 39.4017269  | 29.63009123 | 1.458534496 | 2.864383966 | 16.32698861 | 28.05 | 4.679529412 |
| 2016 | 36.73279822 | 37.23626202 | 1.339492206 | 2.44465135  | 13.93451269 | 31.8  | 5.9568      |
| 2016 | 31.85136006 | 24.66762776 | 1.561985662 | 2.922986209 | 16.66102139 | 33.95 | 4.299435294 |

|      |             |             |             |             |             |       |             |
|------|-------------|-------------|-------------|-------------|-------------|-------|-------------|
| 2016 | 28.93041292 | 28.02545685 | 1.289151065 | 2.045645641 | 11.66018015 | 33.4  | 3.582352941 |
| 2016 | 34.55252091 | 37.52438544 | 1.858428839 |             |             | 32.3  | 3.623529412 |
| 2016 | 35.74149184 | 33.50422267 | 0.797604341 | 3.145950443 | 17.93191752 | 30.4  | 6.476141176 |
| 2016 | 31.58814119 | 25.99028197 | 1.428007916 | 2.644769523 | 15.07518628 | 32.2  | 3.778823529 |
| 2016 | 34.6214759  | 28.75917562 | 1.225937088 | 2.184330634 | 12.45068461 | 27.3  | 4.099764706 |
| 2016 | 39.76834933 | 27.92953813 | 1.918208798 | 2.768247975 | 15.77901346 |       | 2.980941176 |
| 2016 | 36.59225498 | 23.45707312 | 0.986337565 | 3.250941616 | 18.53036721 |       | 1.746117647 |
| 2016 | 32.17453116 | 35.51659951 | 1.375393496 | 3.003924437 | 17.12236929 |       | 3.366823529 |
| 2016 | 30.46519068 | 21.76109725 | 1.121192727 | 3.191535689 | 18.19175343 |       | 4.013176471 |
| 2016 | 43.28318352 | 49.30976986 | 1.350950063 | 3.063993982 | 17.4647657  |       | 3.791294118 |
| 2016 | 41.62014663 | 25.53267543 | 1.383786663 | 2.655041779 | 15.13373814 |       | 4.592       |
| 2016 | 32.47455185 | 32.34037945 | 0.794777043 | 2.672808156 | 15.23500649 | 35    | 4.720941176 |
| 2016 | 30.2909341  | 28.69677532 | 1.10338802  | 2.878491446 | 16.40740124 | 32.75 | 4.006588235 |
| 2016 | 29.02181067 | 28.92524179 | 1.06111053  | 2.461197186 | 14.02882396 | 32.7  |             |
| 2016 | 26.10747114 | 23.8065404  | 1.29640063  | 2.363787873 | 13.47359087 | 32.35 | 4.141176471 |
| 2016 | 27.91914053 | 20.91919794 | 1.672959386 | 2.756319936 | 15.71102364 | 28.9  | 3.168       |
| 2016 | 27.98344733 | 23.88289453 | 1.031562495 | 2.957358219 | 16.85694185 | 32.1  | 2.764235294 |
| 2016 | 33.20364965 | 22.50497753 | 1.613781571 | 2.960858596 | 16.876894   | 30.75 | 4.939082353 |
| 2016 | 30.23833361 | 26.00328433 | 2.137664939 | 2.840702282 | 16.192003   | 31.25 | 3.107294118 |
| 2016 | 31.40976794 | 25.36344648 | 1.446105606 | 2.046784244 | 11.66667019 | 27.95 | 5.109458824 |
| 2016 | 27.4649318  | 29.04922101 | 1.461416457 | 2.287105721 | 13.03650261 | 34.15 | 4.379764706 |
| 2016 | 38.60990178 | 27.30854927 | 0.867888076 | 2.370133487 | 13.50976087 | 31.45 | 4.820823529 |
| 2016 | 35.97297934 | 31.88868483 | 1.498236282 | 2.883382048 | 16.43527768 | 33.55 | 4.777070588 |
| 2016 | 32.94760937 | 25.2872145  | 1.365728425 |             |             | 26.25 | 6.289882353 |
| 2016 | 34.68668236 | 29.21955823 | 1.540581332 | 2.492112209 | 14.20503959 | 34.05 | 3.622823529 |
| 2016 | 31.08125507 | 43.63215992 | 1.442413775 | 2.578824305 | 14.69929854 | 34.65 |             |
| 2016 | 22.93411922 | 22.26951336 | 1.770769281 | 3.023201871 | 17.23225066 | 36.1  | 4.632647059 |
| 2016 | 33.44700292 | 19.41633472 | 0.848120407 | 2.701394376 | 15.39794794 | 34.6  | 3.426823529 |
| 2016 | 42.1543239  | 24.16100616 | 1.468780217 | 2.686246615 | 15.31160571 | 34.25 | 3.696       |
| 2016 | 37.60478348 | 32.10297102 | 1.316927903 | 3.458039321 | 19.71082413 |       | 3.222117647 |
| 2016 | 30.27511337 | 27.38566744 | 0.986646796 | 2.930190687 | 16.70208691 |       | 2.807294118 |
| 2016 | 39.75106664 | 38.86401204 | 1.346945739 | 2.46831498  | 14.06939539 |       | 2.392470588 |
| 2016 | 30.8864191  | 31.44488983 | 1.736005935 |             |             | 34.55 | 6.911964706 |

|      |             |             |             |             |             |       |             |
|------|-------------|-------------|-------------|-------------|-------------|-------|-------------|
| 2016 | 24.99812837 | 21.37243188 | 1.7000994   | 2.046711073 | 11.66625312 | 39.45 | 4.358588235 |
| 2016 | 24.57999058 | 31.8605382  | 1.438960296 | 2.916760019 | 16.62553211 |       | 4.188964706 |
| 2016 | 21.8560643  | 17.24937233 | 0.959255018 | 2.720432655 | 15.50646613 | 32.05 |             |
| 2016 | 32.37763405 | 28.79062613 | 1.406712133 | 3.575564754 | 20.3807191  | 31.9  | 3.7796      |
| 2016 | 34.27620381 | 28.43206879 | 1.514673849 | 2.577597515 | 14.69230583 | 31.76 | 3.478588235 |
| 2016 | 42.20250619 | 40.44150489 | 1.164474768 | 2.747957391 | 15.66335713 | 34.24 | 2.952       |
| 2016 | 35.84561681 | 28.60949747 | 1.275724784 | 3.237636404 | 18.4545275  | 33.95 | 3.416       |
| 2016 | 44.56491769 | 41.90926831 | 1.694993598 | 3.712966137 | 21.16390698 | 34.7  | 3.743058824 |
| 2016 | 23.05740033 | 22.69703229 | 1.215436248 | 3.030958592 | 17.27646398 | 35.6  | 5.897623529 |
| 2016 | 26.01048494 | 24.37884397 | 1.407560926 | 3.072809018 | 17.5150114  | 34.25 | 5.228388235 |
| 2016 | 38.06423134 | 38.24791092 | 1.673277909 | 2.569359252 | 14.64534773 | 30.8  | 4.172235294 |
| 2016 | 25.82657993 | 20.76894578 | 1.799476652 | 2.883240806 | 16.4344726  | 32.1  | 4.670352941 |
| 2016 | 30.91777201 | 29.67246611 | 1.52903085  | 2.540053828 | 14.47830682 | 31.65 | 6.174070588 |
| 2016 | 36.6994024  | 37.1779676  | 1.791873984 | 3.083978666 | 17.57867839 | 27.05 | 5.804047059 |
| 2016 | 37.17200396 | 25.67650038 | 1.362888658 | 3.295553506 | 18.78465498 | 32    | 4.168329412 |
| 2016 | 32.60800547 | 24.7155517  | 1.426890826 | 2.62277561  | 14.94982098 | 35.1  | 5.268811765 |
| 2016 | 43.06620075 | 36.91196599 | 1.831235144 | 3.038488133 | 17.31938236 | 32.75 | 3.230117647 |
| 2016 | 33.65144523 | 23.65415588 | 1.351040039 | 2.839730621 | 16.18646454 | 32.55 | 6.537882353 |
| 2016 | 35.95695245 | 33.43088663 | 1.54003089  | 2.465263114 | 14.05199975 | 30.55 | 3.727058824 |
| 2016 | 32.36942823 | 23.63627286 | 1.170183234 | 2.585822914 | 14.73919061 | 35.15 | 5.569882353 |
| 2016 | 23.34687617 | 23.1200317  | 1.340606311 | 2.923428108 | 16.66354021 | 26.8  | 5.344       |
| 2016 | 30.8562848  | 27.76693939 | 1.333874243 | 2.975418968 | 16.95988812 | 32.8  | 5.557764706 |
| 2016 | 34.87259897 | 33.63658578 | 1.053385278 | 3.05159976  | 17.39411863 | 30.4  | 6.056470588 |
| 2016 | 36.17373041 | 22.04495828 | 1.395739756 | 3.060142338 | 17.44281133 | 34.65 | 4.337882353 |
| 2016 | 36.58318696 | 24.10300759 | 1.096179318 | 2.850353811 | 16.24701672 | 32.35 | 3.799529412 |
| 2016 | 28.13197365 | 19.39719175 | 1.535428631 | 2.548775653 | 14.52802122 | 26.3  |             |
| 2016 | 34.79291653 | 30.17349942 | 1.352716884 | 2.778889821 | 15.83967198 | 29.4  | 4.224858824 |
| 2016 | 30.08351983 | 25.80472805 | 1.711982092 | 3.585466047 | 20.43715647 | 35.3  | 3.360882353 |
| 2016 | 29.07916015 | 23.67955689 | 1.370715038 | 2.539126967 | 14.47302371 | 32.4  | 3.666023529 |
| 2016 | 35.69258602 | 27.41932282 | 1.759965223 | 2.863680704 | 16.32298002 | 25.5  | 4.780082353 |
| 2016 | 30.5091482  | 34.60173326 | 1.683857147 | 2.891691587 | 16.48264205 | 29.65 | 3.903058824 |
| 2016 | 46.1700465  | 35.9658371  | 1.506859102 | 2.911424574 | 16.59512007 | 31.75 | 4.436364706 |
| 2016 | 28.19879471 | 25.51372781 | 1.230489633 | 2.529809302 | 14.41991302 | 31.05 | 4.649035294 |



|      |             |             |             |             |             |       |             |
|------|-------------|-------------|-------------|-------------|-------------|-------|-------------|
| 2016 | 35.63404688 | 23.70331128 | 1.7434868   | 2.451496115 | 13.97352786 | 36.5  | 5.579105882 |
| 2016 | 33.375201   | 29.53989056 | 1.672998671 | 2.352089633 | 13.40691091 | 29.5  | 4.725917647 |
| 2016 | 31.67983804 | 23.52200766 | 1.487330161 | 2.050917746 | 11.69023115 | 27.6  | 3.033411765 |
| 2016 |             |             |             |             |             | 27.4  | 3.913411765 |
| 2016 | 34.49606909 | 29.51694594 | 1.972025388 | 2.731731705 | 15.57087072 | 25.3  | 3.737411765 |
| 2016 | 30.81795425 | 30.88768495 | 1.95482304  | 2.476384486 | 14.11539157 | 35.65 | 5.898070588 |
| 2016 | 27.25861106 | 23.93657226 | 0.980558079 | 2.476239747 | 14.11456656 | 34.95 | 4.068705882 |
| 2016 | 33.19733777 | 26.27882081 | 2.045295454 | 2.863666589 | 16.32289956 | 32.6  | 4.462305882 |
| 2016 | 28.97888701 | 21.65578172 | 1.594992161 | 2.693921602 | 15.35535313 | 33.6  | 4.968235294 |
| 2016 | 35.28178601 | 30.69541155 | 1.602287875 | 2.214806039 | 12.62439442 | 32.55 | 3.716705882 |
| 2016 | 27.7725553  | 21.58077408 | 1.16592126  | 2.773542197 | 15.80919052 | 33.3  | 3.668894118 |
| 2016 | 26.44465079 | 30.38476861 | 1.599836871 | 2.685373383 | 15.30662828 | 28.2  | 5.083941176 |
| 2016 | 31.79720226 | 29.05257183 | 1.166335718 | 2.257030301 | 12.86507271 | 24.6  | 3.985882353 |
| 2016 | 26.89396495 | 23.38605291 | 1.247475526 | 3.059698849 | 17.44028344 | 30.8  | 4.089411765 |
| 2016 | 23.2348457  | 17.92270884 | 1.688995332 | 2.925372349 | 16.67462239 | 34    | 3.716705882 |
| 2016 | 31.03405714 | 26.10841276 | 2.699719923 | 2.149316758 | 12.25110552 | 28.85 |             |
| 2016 | 29.88002781 | 28.43306345 | 2.069670842 | 2.223883448 | 12.67613565 | 33.4  | 3.758117647 |
| 2016 | 25.65532537 | 26.34060842 | 1.272047001 | 2.335617319 | 13.31301872 | 28.05 | 4.072670588 |
| 2016 | 34.07469305 | 33.01084585 | 1.494064604 | 3.237504403 | 18.4537751  | 24.15 | 2.826352941 |
| 2016 | 28.84089522 | 32.84931283 | 1.778808841 | 3.326482207 | 18.96094858 | 25.15 | 4.555294118 |
| 2016 | 28.57186069 | 33.3824127  | 1.532289422 | 2.679069011 | 15.27069336 | 30    | 5.282635294 |
| 2016 | 38.9877441  | 38.90079973 | 1.638884456 |             |             | 27.6  | 4.182588235 |
| 2016 | 30.28545596 | 38.68404679 | 1.402142099 | 2.923472641 | 16.66379405 | 28.65 | 3.116235294 |
| 2016 | 28.3569313  | 26.77052025 | 1.64003826  | 3.217587586 | 18.34024924 | 27.2  | 3.009882353 |
| 2016 | 28.50644389 | 32.28777163 | 1.629077069 | 3.194301667 | 18.2075195  | 28.15 | 3.312941176 |
| 2016 | 26.49035121 | 26.96631884 | 0.816565409 |             |             | 28.05 | 3.437176471 |
| 2016 | 30.44925979 | 31.12654501 | 1.070368909 | 3.000992721 | 17.10565851 | 29.6  |             |
| 2016 | 34.97099904 | 33.56348717 | 1.643405361 | 2.922536224 | 16.65845648 | 24.9  | 3.292235294 |
| 2016 | 31.43902467 | 33.01972379 | 1.792123167 | 2.927053926 | 16.68420738 | 28.9  | 4.689882353 |
| 2016 | 32.78478549 | 33.98568102 | 1.623966577 | 2.73607386  | 15.595621   | 28.4  | 5.065176471 |
| 2016 | 30.03809871 | 27.33357356 | 1.209343232 | 2.913274096 | 16.60566234 | 27.9  | 6.011435294 |
| 2016 | 37.13379072 | 35.75414875 | 1.401772238 |             |             | 28.75 | 3.790964706 |
| 2016 | 27.95181631 | 55.31159211 | 1.641388126 | 3.214963027 | 18.32528925 | 31.2  | 2.577882353 |

|      |             |             |             |             |             |       |             |
|------|-------------|-------------|-------------|-------------|-------------|-------|-------------|
| 2016 | 33.8280907  | 34.68842298 | 1.226773227 | 3.158416623 | 18.00297475 | 31.15 | 2.64        |
| 2016 | 32.00723193 | 38.23402376 | 1.783927217 | 3.972052433 | 22.64069887 | 28.6  | 3.903058824 |
| 2016 | 37.74110309 | 28.03255129 | 1.910308495 | 2.846971193 | 16.2277358  | 27.95 | 4.807905882 |
| 2016 | 31.06756127 | 27.56103799 | 1.813843142 | 3.123175383 | 17.80209968 | 30.5  | 4.076047059 |
| 2016 | 31.54914101 | 33.96445204 | 1.48814074  | 2.651544682 | 15.11380469 | 34.3  | 3.406117647 |
| 2016 | 32.95477519 | 31.25990029 | 2.013814769 | 3.016266656 | 17.19271994 | 30.7  | 4.431694118 |
| 2016 |             |             |             |             |             | 34.05 | 3.230117647 |
| 2016 | 42.07428352 | 29.45249202 | 1.587942068 | 3.361020722 | 19.15781811 | 30.45 | 4.410352941 |
| 2016 | 24.53604589 | 27.36369173 | 0.701027463 | 3.472096313 | 19.79094899 | 27.4  | 3.518988235 |
| 2016 | 37.37617328 | 28.58880731 | 1.163657235 | 3.249522404 | 18.5222777  | 24.4  | 3.7884      |
| 2016 | 33.51538126 | 31.21789261 | 1.378407213 | 3.105683487 | 17.70239587 | 29.65 | 3.815364706 |
| 2016 | 30.18608268 | 28.62216431 | 1.490013882 | 2.264564132 | 12.90801555 | 32.15 | 5.012247059 |
| 2016 | 34.37067055 | 34.09592177 | 1.027972462 | 2.660028314 | 15.16216139 | 29.8  | 5.456411765 |
| 2016 | 36.36081381 | 33.55877503 | 1.459970144 | 2.548637862 | 14.52723581 | 30.4  | 4.731294118 |
| 2016 | 26.69374632 | 30.79381401 | 1.736956455 | 2.606768246 | 14.858579   | 28.75 | 4.054764706 |
| 2016 | 31.47422078 | 27.63995362 | 1.364526798 | 2.451137833 | 13.97148565 | 30.3  | 5.145411765 |
| 2016 | 36.32186783 | 35.87292645 | 1.931568774 | 2.510288296 | 14.30864329 | 28.1  | 4.586352941 |
| 2016 | 33.52394875 | 26.77428238 | 1.065774087 | 2.978199306 | 16.97573604 | 32.7  | 4.062494118 |
| 2016 | 33.72179228 | 27.95687969 | 2.049486332 | 3.373070868 | 19.22650395 | 31.55 | 4.442070588 |
| 2016 | 39.71046432 | 35.66904428 | 1.431658563 | 3.055531664 | 17.41653049 | 26.45 | 4.586352941 |
| 2016 | 2.09        | 0.657       | 1.28743535  | 2.956636049 | 16.85282548 | 28.4  | 2.847058824 |
| 2016 | 28.26432855 | 20.2786413  | 1.176364552 | 2.013014923 | 11.47418506 | 30.9  | 3.292235294 |
| 2016 | 31.56184102 | 24.55715171 | 1.368079133 | 2.492516548 | 14.20734433 | 28.5  | 3.385411765 |
| 2016 | 32.5325781  | 31.32949609 | 1.512502988 | 2.535927396 | 14.45478616 | 35.45 | 2.045176471 |
| 2016 | 39.93691021 | 45.11714474 | 2.211286746 | 2.921741224 | 16.65392498 | 30    | 2.360470588 |
| 2016 | 34.23792063 | 33.62756429 | 1.913137135 | 3.176454278 | 18.10578938 | 32.7  | 3.148847059 |
| 2016 | 40.43481238 | 32.44615368 | 1.341346078 | 2.435694548 | 13.88345893 | 31.6  | 3.446470588 |
| 2016 | 27.31075794 | 31.34263188 | 1.321159129 | 3.320948775 | 18.92940802 | 32.4  | 4.016941176 |
| 2016 | 33.94376927 | 35.0673997  | 1.138224114 | 2.512126116 | 14.31911886 | 34.4  | 4.209247059 |
| 2016 | 38.89236412 | 29.13500722 | 0.966295074 | 2.311366294 | 13.17478788 | 37.45 | 2.964823529 |
| 2016 | 41.93014139 | 29.71945566 | 2.064852108 | 3.206083981 | 18.27467869 | 36.2  | 5.815588235 |
| 2016 | 39.2361931  | 34.2659148  | 2.053454403 | 2.925503349 | 16.67536909 | 33.45 | 4.752       |
| 2016 | 16.76417102 | 21.07292287 | 1.828185898 | 2.999326279 | 17.09615979 | 32.9  | 5.272517647 |

|      |             |             |             |             |             |       |             |
|------|-------------|-------------|-------------|-------------|-------------|-------|-------------|
| 2016 | 36.7600983  | 32.75718708 | 1.547538946 | 3.017966378 | 17.20240836 |       |             |
| 2016 | 45.74390873 | 37.41198747 | 1.434699781 | 3.339315384 | 19.03409769 | 31.45 | 4.016941176 |
| 2016 | 33.22084013 | 26.67038373 | 2.211476768 | 3.971752225 | 22.63898768 | 36.4  | 4.824164706 |
| 2016 | 33.81201199 | 29.34683781 | 0.675455743 | 3.280307034 | 18.69775009 | 34.5  | 2.940235294 |
| 2016 | 27.16831645 | 36.13944938 | 1.270193851 | 3.077145669 | 17.53973031 | 35.7  | 2.878117647 |
| 2016 | 31.30645199 | 26.58977052 | 1.318031052 | 2.816926998 | 16.05648389 | 31.65 | 5.518117647 |
| 2016 | 33.54477418 | 31.26461993 | 1.510847528 | 2.654661984 | 15.13157331 | 32.4  | 3.509647059 |
| 2016 | 48.23254121 | 56.48867118 |             | 2.764547366 | 15.75791999 | 33.35 | 3.954823529 |
| 2016 | 29.57191191 | 26.72277267 | 1.426325782 | 2.159532136 | 12.30933318 | 38.8  | 3.442788235 |
| 2016 | 36.52329112 | 37.62164144 | 1.599667525 | 2.840522843 | 16.1909802  | 32.15 | 5.5566      |
| 2016 | 27.96958031 | 26.88549812 | 1.832910474 | 2.911357587 | 16.59473825 | 36.8  | 5.521623529 |
| 2016 | 45.87203999 | 29.65970223 | 1.381506414 | 2.625520058 | 14.96546433 | 29.05 | 4.734941176 |
| 2016 | 27.2851829  | 28.48039095 | 1.022132131 | 2.482246238 | 14.14880356 | 34.8  | 5.704729412 |
| 2016 |             |             | 1.66503763  | 3.11933801  | 17.78022665 | 31.4  | 3.666941176 |
| 2016 |             |             |             |             |             | 36.85 |             |
| 2016 |             |             | 1.880751968 |             |             | 34.6  | 1.666823529 |
| 2016 | 47.57073937 | 58.2012434  | 1.484394895 | 2.831699986 | 16.14068992 | 32.95 | 0.496941176 |
| 2016 | 29.17903417 | 26.31046978 | 1.234406729 | 2.670445226 | 15.22153779 |       | 3.457882353 |
| 2016 |             |             | 1.411348284 | 2.94202828  | 16.7695612  | 30.7  | 6.011435294 |
| 2016 | 34.02652323 | 27.39654683 | 0.825811705 | 2.401129107 | 13.68643591 | 30.2  | 3.354352941 |
| 2016 | 45.8915246  | 42.15401274 | 1.024634647 | 2.628001217 | 14.97960694 | 33.55 | 4.553788235 |
| 2016 | 43.12291559 | 35.77740894 | 0.687330673 | 3.211339957 | 18.30463775 | 28.95 | 5.870117647 |
| 2016 | 39.39658836 | 31.90125018 | 1.759135558 | 3.160339426 | 18.01393473 | 29.5  | 3.992823529 |
| 2016 | 33.235958   | 23.76825389 | 1.540653882 | 2.673129279 | 15.23683689 | 33.84 | 6.203058824 |
| 2016 | 32.90199069 | 28.17194371 | 1.611575965 | 1.620462572 | 9.236636663 | 30.6  |             |
| 2016 | 40.5887327  | 34.79484058 | 1.639168164 | 3.112135759 | 17.73917382 | 35.95 | 4.251470588 |
| 2016 | 27.41709367 | 23.62907165 | 1.842292244 | 2.65856239  | 15.15380562 | 35.4  | 6.955529412 |
| 2016 | 34.60715331 | 30.45398147 | 1.399298621 | 2.58636609  | 14.74228672 | 29.95 | 3.002352941 |
| 2016 | 39.42390414 | 36.10540315 | 1.025633339 | 2.553287853 | 14.55374076 | 33.55 | 4.212094118 |
| 2016 | 41.85220374 | 24.5293833  | 1.221805438 | 1.976020273 | 11.26331556 | 35.15 | 6.029411765 |
| 2016 | 50.75462922 | 49.94474983 | 1.115229771 | 3.071847547 | 17.50953102 | 34.1  | 4.076552941 |
| 2016 | 38.44814624 | 35.75895207 | 1.197419636 | 2.624528864 | 14.95981453 | 34.22 | 5.064705882 |
| 2016 | 34.4170814  | 35.24531727 | 1.101752489 | 2.897015633 | 16.51298911 | 31.65 | 3.314729412 |

|      |             |             |             |             |             |       |             |
|------|-------------|-------------|-------------|-------------|-------------|-------|-------------|
| 2016 | 49.33998089 | 50.17192327 | 1.590840302 | 2.966524179 | 16.90918782 | 30.65 | 4.120470588 |
| 2016 | 32.40206694 | 29.27185381 | 1.765113366 | 2.595486926 | 14.79427548 | 29.5  | 3.230117647 |
| 2016 | 21.09738813 | 26.56668123 | 1.533809271 | 2.514124005 | 14.33050683 | 36.1  | 4.857082353 |
| 2016 | 30.49282112 | 27.30488043 | 1.296265146 | 2.782386831 | 15.85960493 | 29.5  | 4.633588235 |
| 2016 | 34.17211783 | 35.46219527 | 1.407978876 | 2.65322275  | 15.12336968 | 34.6  | 5.425729412 |
| 2016 | 25.69725112 | 23.55597165 | 1.488859962 | 3.027732351 | 17.2580744  | 33.95 | 5.991670588 |
| 2016 | 33.54790443 | 32.23287203 | 1.330992789 | 2.813175569 | 16.03510074 | 29.55 | 4.596705882 |
| 2016 | 32.54994544 | 30.57584102 | 1.214233226 | 3.966154408 | 22.60708012 | 31.3  | 4.874258824 |
| 2016 | 28.80131302 | 29.91325367 | 1.44004553  | 2.046139759 | 11.66299663 | 31.25 | 5.170823529 |
| 2016 | 29.24638972 | 31.67883871 | 1.769734144 | 2.769059994 | 15.78364197 | 30.85 |             |
| 2016 | 31.66107369 | 21.22828356 | 1.037367002 | 3.07198497  | 17.51031433 | 33.45 | 4.493176471 |
| 2016 | 30.64208099 | 24.23920253 | 1.423402188 | 2.52056272  | 14.3672075  | 32.85 | 5.713976471 |
| 2016 | 33.18220358 | 32.49844349 |             | 2.747988322 | 15.66353343 | 32    |             |
| 2016 | 52.61061168 | 46.10328155 | 1.284768972 | 2.759998927 | 15.73199389 | 33.2  | 3.574117647 |
| 2016 | 34.71358887 | 30.49828605 | 1.476268103 | 2.822105352 | 16.0860005  | 35.25 | 3.502317647 |
| 2016 | 50.23558793 | 41.82170951 | 1.087623477 | 2.683335408 | 15.29501183 | 34.4  | 3.926352941 |
| 2016 | 33.75542967 | 31.44206977 | 1.113437926 |             |             | 32    | 4.229811765 |
| 2016 | 29.39861177 | 31.64704452 | 1.794110455 | 3.242071332 | 18.47980659 | 36.2  | 4.273647059 |
| 2016 | 41.64393384 | 38.4413994  | 1.756625398 | 3.074882073 | 17.52682781 | 34.3  |             |
| 2016 | 40.03713283 | 28.35194276 | 1.147154389 | 1.050514014 | 5.987929878 | 32.45 | 2.981647059 |
| 2016 | 33.39869003 | 38.53658581 | 1.757402928 | 3.118315832 | 17.77440024 | 35.8  | 5.296235294 |
| 2016 | 47.09506163 | 41.1465437  | 1.302457308 | 2.485514441 | 14.16743231 | 38.15 | 3.78        |
| 2016 | 30.64346916 | 33.03078458 | 1.391898141 | 2.557683742 | 14.57879733 | 31.5  | 5.147258824 |
| 2016 | 32.83568678 | 35.08886274 | 1.825941574 | 2.742875816 | 15.63439215 | 36.8  |             |
| 2016 | 26.85358137 | 27.74042442 | 1.780537785 |             |             | 32.4  | 3.364705882 |
| 2016 | 32.56536435 | 36.41155302 | 1.881824287 | 3.045100283 | 17.35707161 | 35.6  | 4.016941176 |
| 2016 | 33.24692008 | 29.29336959 | 1.070385339 | 2.442284735 | 13.92102299 | 35.4  | 4.534117647 |
| 2016 | 32.26031601 | 28.13791495 | 1.394503736 | 2.589356305 | 14.75933094 | 37.95 | 6.809470588 |
| 2016 | 38.62729104 | 29.02982501 | 2.023215125 | 3.467111022 | 19.76253283 | 33.25 | 5.616752941 |
| 2016 | 37.64906716 | 34.56020064 | 1.069215615 | 2.768066256 | 15.77797766 | 34.25 | 5.553823529 |
| 2016 | 40.46288984 | 37.54695261 | 1.081014303 | 2.408180391 | 13.72662823 | 37.2  | 6.086211765 |
| 2016 | 32.13382247 | 20.28455263 | 1.822351944 | 2.042080135 | 11.63985677 | 30.35 | 4.727647059 |
| 2016 | 33.17395767 | 28.70161404 | 0.874168199 | 1.969651004 | 11.22701072 | 32.35 | 5.626541176 |

|      |             |             |             |             |             |       |             |
|------|-------------|-------------|-------------|-------------|-------------|-------|-------------|
| 2016 | 23.84449598 | 26.22643824 | 1.455510442 | 3.085550263 | 17.5876365  | 33.9  | 6.325082353 |
| 2016 | 39.4022027  | 31.76165127 | 1.202442031 | 3.096937018 | 17.65254101 | 30.4  | 5.065505882 |
| 2016 | 33.0002757  | 35.29385536 | 1.522360394 | 2.399642703 | 13.67796341 | 37.35 | 4.037647059 |
| 2016 | 38.00261465 | 46.25033908 | 1.521932405 | 3.143841986 | 17.91989932 | 31.7  | 4.793411765 |
| 2016 | 30.70616464 | 29.66231898 | 1.227908202 | 3.562146976 | 20.30423777 | 34.75 | 3.188705882 |
| 2016 | 30.78792745 | 25.80974711 | 1.44264677  | 2.988520058 | 17.03456433 | 32.45 | 6.726094118 |
| 2016 | 39.98151254 | 30.32187578 | 0.953690659 | 2.729081902 | 15.55576684 | 31.2  | 4.286117647 |
| 2016 | 29.06540707 | 20.94057226 | 0.862185795 | 1.943439679 | 11.07760617 | 29.65 | 7.630117647 |
| 2016 | 29.9250488  | 27.8187845  | 1.898413527 | 3.403314884 | 19.39889484 | 33.6  | 3.965176471 |
| 2016 | 33.0995463  | 25.79035628 | 1.440747189 | 3.04133252  | 17.33559536 | 36.95 | 4.343729412 |
| 2016 | 37.54377666 | 29.51971345 | 1.38980854  | 3.166934534 | 18.05152685 | 31.2  | 3.602823529 |
| 2016 | 37.22395273 | 31.61558919 | 1.470255605 | 3.006911979 | 17.13939828 | 33.3  | 4.296470588 |
| 2016 | 31.51822365 | 23.27440774 | 1.496386746 | 2.845118163 | 16.21717353 | 34.6  | 5.207529412 |
| 2016 | 30.86692813 | 29.09745714 | 1.870435252 | 3.119212868 | 17.77951335 | 30.95 | 5.4374      |
| 2016 | 40.80238074 | 39.71403204 | 1.348474934 | 3.077978126 | 17.54447532 | 32.1  | 3.923764706 |
| 2016 | 52.04594292 | 32.01657223 | 1.884049172 | 3.118493341 | 17.77541205 | 32.5  | 4.075470588 |
| 2016 | 30.81944049 | 25.90942704 | 1.266725004 | 3.157568357 | 17.99813963 | 32.1  |             |
| 2016 | 30.73900569 | 27.52081722 | 1.690615023 | 2.912602573 | 16.60183467 | 34.95 | 3.116235294 |
| 2016 | 42.61040905 | 39.68933271 | 1.874602435 | 3.403993578 | 19.40276339 | 31.7  | 4.731294118 |
| 2016 | 38.14575125 | 35.63470732 | 1.390986668 | 3.325309556 | 18.95426447 | 37.1  | 4.555294118 |
| 2016 |             |             |             |             |             | 37.6  | 3.199058824 |
| 2016 | 34.09577585 | 24.68200294 | 2.922163613 | 3.224676376 | 18.38065535 | 39.3  | 3.8456      |
| 2016 | 49.02339752 | 51.04011721 | 1.232985241 | 3.243396025 | 18.48735734 | 35.65 | 3.126588235 |
| 2016 | 28.23517487 | 24.57705857 | 0.994967107 | 2.395539558 | 13.65457548 | 34.2  |             |
| 2016 | 34.836167   | 26.36900459 | 1.740129981 | 4.178956115 | 23.82004985 | 34.95 | 3.644235294 |
| 2016 | 39.07546744 | 39.31982367 | 1.324468556 | 3.401388297 | 19.38791329 | 29.45 | 3.664941176 |
| 2016 | 34.30862747 | 28.16492026 | 1.719582613 | 2.408184396 | 13.72665106 | 33.75 | 2.888470588 |
| 2016 | 33.4256962  | 27.34056425 | 1.400349305 | 3.175014611 | 18.09758328 | 34.05 | 4.426270588 |
| 2016 | 30.96281914 | 28.00587498 | 1.568848234 | 3.041621193 | 17.3372408  | 29.15 | 3.406117647 |
| 2016 | 37.36324778 | 38.71915694 | 1.887671226 |             |             | 30.55 | 3.844094118 |
| 2016 | 35.69443865 | 28.80392167 | 1.484792204 | 3.165133009 | 18.04125815 | 31.25 |             |
| 2016 | 39.63952121 | 30.91613867 | 1.210370484 | 2.934656466 | 16.72754186 | 31.4  | 3.333647059 |
| 2016 | 36.21447962 | 22.11634285 | 1.472832382 | 3.123776899 | 17.80552833 | 33.55 | 5.059764706 |

|      |             |             |             |             |             |       |             |
|------|-------------|-------------|-------------|-------------|-------------|-------|-------------|
| 2016 | 50.40985942 | 49.8344732  | 1.464889017 | 3.184881358 | 18.15382374 | 32.8  | 4.037647059 |
| 2016 | 35.07706692 | 34.55177617 | 1.343120889 | 2.04175047  | 11.63797768 | 36.7  | 2.992       |
| 2016 | 33.61053188 | 28.77132042 | 1.425514333 | 2.78166752  | 15.85550486 | 34    | 5.412       |
| 2016 | 33.26443064 | 27.92995985 | 1.581103768 | 3.313106015 | 18.88470429 | 34.4  | 4.668988235 |
| 2016 | 31.72289365 | 27.9705934  | 1.313939691 | 2.607363639 | 14.86197274 | 35.55 | 4.119317647 |
| 2016 | 33.70062428 | 30.75856234 |             | 2.725306812 | 15.53424883 | 36.8  | 5.537270588 |
| 2016 | 36.45103489 | 30.71294224 | 1.755887546 | 2.464915477 | 14.05001822 | 34.45 | 4.386058824 |
| 2016 | 48.2731866  | 33.57111182 | 0.901722622 | 2.581124956 | 14.71241225 | 31.6  | 4.819952941 |
| 2016 | 42.70080024 | 31.47460159 | 1.227689856 | 3.273778473 | 18.6605373  | 30.5  | 4.695482353 |
| 2016 | 39.01692723 | 27.61315705 | 1.360859845 | 2.739414892 | 15.61466488 | 31.7  |             |
| 2016 | 43.98999315 | 35.59167238 | 1.704176606 | 2.935058311 | 16.72983237 | 32.5  | 3.996235294 |
| 2016 | 29.28681794 | 23.25550385 | 1.173045422 | 3.181234632 | 18.1330374  | 35.5  | 3.209411765 |
| 2016 | 34.51410513 | 26.48261593 | 1.186536413 | 2.911918284 | 16.59793422 | 33.25 | 3.333647059 |
| 2016 | 35.10119571 | 33.6716299  | 1.728795723 | 3.14574073  | 17.93072216 | 33.8  | 4.126129412 |
| 2016 | 31.91878594 | 19.25472059 | 1.453160427 | 2.832080452 | 16.14285858 | 39.85 | 6.183823529 |
| 2016 | 35.60471206 | 33.98361906 | 1.761721461 |             |             | 36.85 | 3.934117647 |
| 2016 | 46.34961072 | 43.4201755  | 1.547083145 | 3.254949522 | 18.55321228 | 38.7  | 3.644235294 |
| 2016 | 32.14278477 | 23.88646537 | 1.116156534 | 2.999607437 | 17.09776239 | 33.05 | 2.194823529 |
| 2016 |             |             | 1.721756094 |             |             | 33.11 | 0.310588235 |
| 2016 | 42.25055342 | 46.28927031 | 2.03671057  | 2.762152868 | 15.74427135 | 32.2  | 0.424470588 |
| 2016 | 44.44878807 | 43.12383348 | 1.493552637 | 2.425826422 | 13.8272106  | 37.5  | 5.738917647 |
| 2016 | 40.40060068 | 23.94150829 | 1.026887439 | 2.899299556 | 16.52600747 | 39.9  | 3.095529412 |
| 2016 | 38.49536286 | 29.44893985 | 1.605758845 | 2.836676266 | 16.16905472 | 36.6  |             |
| 2016 | 37.29999524 | 32.6333237  | 1.465525218 | 4.05993131  | 23.14160847 | 34.3  | 3.392682353 |
| 2016 | 47.10677668 | 43.6329845  | 2.043781613 | 2.021837989 | 11.52447654 | 35    | 3.457882353 |
| 2016 | 36.52762045 | 35.18495089 | 2.125815467 | 2.729144153 | 15.55612167 | 32.7  | 3.975529412 |
| 2016 | 27.59388764 | 26.73635793 | 1.680968923 | 3.064753744 | 17.46909634 | 34.65 | 3.975529412 |
| 2016 | 31.46284276 | 23.81196765 | 2.096306521 | 2.759138238 | 15.72708796 | 31.25 |             |
| 2016 | 34.47665928 | 32.41016014 | 1.557302949 | 2.802559568 | 15.97458954 | 37.9  | 3.499294118 |
| 2016 | 33.86593869 | 30.46504247 | 1.455284991 |             |             | 34.1  | 2.6214      |
| 2016 | 35.51304951 | 24.76398516 | 1.649156201 | 3.167277933 | 18.05348422 | 37.75 | 3.778823529 |
| 2016 | 41.91815937 | 33.61113511 | 1.825005119 | 2.670155649 | 15.2198872  | 35.85 | 2.929882353 |
| 2016 | 42.72829688 | 27.09538824 | 1.740170061 | 2.722619375 | 15.51893044 | 33.2  | 6.170352941 |

|      |             |             |             |             |             |       |             |
|------|-------------|-------------|-------------|-------------|-------------|-------|-------------|
| 2016 | 47.54442851 | 46.950906   | 1.558266426 | 0.862261727 | 4.914891846 | 30.9  | 3.054117647 |
| 2016 | 30.31843801 | 33.14463576 | 1.856393444 | 3.241114692 | 18.47435375 | 34.35 |             |
| 2016 | 35.43445739 | 26.08409065 | 2.882547919 | 3.198994314 | 18.23426759 | 36.9  | 3.344       |
| 2016 | 33.85069404 | 31.66902854 | 2.112067489 | 3.66098824  | 20.86763297 | 34.45 |             |
| 2016 | 38.34874117 | 28.7543609  | 1.892289119 | 2.268561457 | 12.9308003  | 36.5  | 4.224       |
| 2016 | 30.24183796 | 22.55072729 | 2.253837539 | 2.41149628  | 13.7455288  | 36.2  | 4.553411765 |
| 2016 | 35.76465786 | 25.93132936 | 1.354038924 | 3.114127442 | 17.75052642 | 35.3  | 6.231917647 |
| 2016 | 42.59154769 | 32.34691885 | 1.328596732 | 1.779262513 | 10.14179633 | 37.8  |             |
| 2016 | 44.55516869 | 29.80415771 | 1.37544766  | 3.100702406 | 17.67400371 | 36.95 |             |
| 2016 | 43.62837039 | 27.40102882 | 2.257843208 | 2.946330745 | 16.79408525 | 34.5  | 2.764235294 |
| 2016 | 36.36745235 | 31.77474162 | 1.629168334 | 2.713686271 | 15.46801175 | 33.45 | 3.271529412 |
| 2016 | 34.33061088 | 20.61057281 | 1.881655969 | 2.105601113 | 12.00192634 | 36.65 | 3.012752941 |
| 2016 | 35.60879441 | 31.80253777 | 1.28254954  | 2.651464255 | 15.11334625 | 37.5  | 3.582117647 |
| 2016 | 31.62329994 | 25.84008661 | 1.758441176 | 2.439263149 | 13.90379995 | 35.1  | 5.621647059 |
| 2016 | 40.86427735 | 30.8194643  | 1.448250951 | 2.31036939  | 13.16910552 | 38.2  |             |
| 2016 |             |             | 1.325708911 | 3.009880791 | 17.15632051 | 40.2  | 6.015058824 |
| 2016 | 36.33695592 | 37.97378346 | 1.954730779 | 2.798817922 | 15.95326216 | 37.4  | 4.673117647 |
| 2016 | 39.88627881 | 41.44115398 | 1.938584157 | 2.504035314 | 14.27300129 | 38.15 | 5.185776471 |
| 2016 | 32.31974431 | 25.23910173 | 1.27578508  | 2.926152216 | 16.67906763 | 40.55 | 6.575435294 |
| 2016 | 30.8683532  | 28.65055252 | 1.680155371 | 2.611472964 | 14.88539589 | 44.15 | 3.354352941 |
| 2016 | 33.23680027 | 25.5221628  | 1.473575596 | 2.96750279  | 16.9147659  | 31.1  | 4.244470588 |
| 2016 | 30.60116281 | 24.43785198 | 1.243672621 | 3.097037056 | 17.65311122 | 34.75 | 5.247623529 |
| 2016 | 25.91219567 | 23.89219454 | 1.638498363 | 2.72969205  | 15.55924468 | 30.6  | 4.355529412 |
| 2016 | 40.69212483 | 34.24848325 | 1.24791389  | 2.827415414 | 16.11626786 | 39.75 | 4.987529412 |
| 2016 | 39.97475992 | 39.49810439 | 1.19480443  | 2.333726684 | 13.3022421  | 40.4  | 5.167176471 |
| 2016 | 38.79501826 | 36.73720451 | 1.569633876 | 2.438497462 | 13.89943554 | 38.2  |             |
| 2016 | 31.51373021 | 27.23701885 | 1.446412041 | 2.823475476 | 16.09381022 | 35.15 | 4.855482353 |
| 2016 | 37.96932087 | 35.07624931 | 0.900804923 | 2.367848557 | 13.49673678 | 33.25 | 3.437176471 |
| 2016 |             |             |             |             |             | 35.05 | 3.456       |
| 2016 | 25.89863382 | 23.40448682 | 1.778739833 | 2.999088588 | 17.09480495 | 32.85 | 4.709317647 |
| 2016 | 31.77084316 | 38.29852031 | 1.397410328 | 2.826691811 | 16.11214332 | 38.35 | 5.476470588 |
| 2016 | 37.42404412 | 35.12524275 | 1.717595433 | 2.743645499 | 15.63877934 | 34.8  | 4.507588235 |
| 2016 | 30.47065453 | 24.69445499 | 1.979316703 | 2.523156715 | 14.38199327 | 33.95 | 4.115823529 |

|      |             |             |             |             |             |       |             |
|------|-------------|-------------|-------------|-------------|-------------|-------|-------------|
| 2016 | 32.9064999  | 30.69826037 | 1.916586679 | 2.841138835 | 16.19449136 | 33.45 | 3.433270588 |
| 2016 | 30.68134488 | 31.11602409 | 0.935464369 | 2.256753396 | 12.86349436 | 34.45 | 4.368941176 |
| 2016 | 36.49591609 | 31.33411155 |             | 3.461185805 | 19.72875909 | 34.7  | 4.285035294 |
| 2016 | 37.05051659 | 38.0106644  | 1.881137699 | 3.163876122 | 18.0340939  | 36.15 | 4.276376471 |
| 2016 | 33.57553504 | 35.80329478 | 1.911149008 | 2.819668396 | 16.07210986 | 35.05 | 3.209411765 |
| 2016 | 37.61465842 | 36.6545681  | 1.541149927 | 2.778628284 | 15.83818122 | 33.7  | 2.913411765 |
| 2016 | 33.32900459 | 32.3534695  | 1.599500033 | 3.581610652 | 20.41518072 | 30.4  | 1.200941176 |
| 2016 | 27.13716772 | 43.01700408 | 1.653023226 | 3.23766565  | 18.45469421 | 31.8  | 3.406117647 |
| 2016 | 22.19873986 | 27.04872563 | 1.693479036 | 2.205496854 | 12.57133207 | 36.15 | 6.290647059 |
| 2016 | 34.94896196 | 33.84273217 | 1.243287824 | 2.378980519 | 13.56018896 | 33.7  | 5.586941176 |
| 2016 | 31.13865216 | 32.61662381 | 1.399129348 | 2.634906872 | 15.01896917 | 35.2  | 6.849411765 |
| 2016 | 37.33555662 | 30.91855559 | 1.807618091 | 2.426045411 | 13.82845884 | 37.1  | 3.426776471 |
| 2016 | 33.79783213 | 32.08568306 | 1.401879198 | 3.002673217 | 17.11523734 | 37.5  | 3.714117647 |
| 2016 | 38.04953546 | 30.5237483  | 1.54069308  | 2.838650059 | 16.18030534 | 34.5  | 3.457882353 |
| 2016 | 37.80533726 | 25.82516428 | 1.533641541 | 2.660781937 | 15.16645704 | 37.75 | 4.910352941 |
| 2016 | 15.00627079 | 25.40225257 | 2.180512515 | 3.210028613 | 18.2971631  | 37.15 | 3.830588235 |
| 2016 | 38.25012345 | 35.63935596 | 2.503085127 |             |             | 35.6  | 4.967470588 |
| 2016 | 38.31397009 | 34.00773884 | 1.48438766  | 2.31213163  | 13.17915029 | 38.3  | 3.281882353 |
| 2016 | 36.81588761 | 32.3544484  | 1.725451048 | 2.583175618 | 14.72410103 | 38.15 | 2.317270588 |
| 2016 | 33.05968213 | 30.29247797 | 1.702217653 | 2.814638178 | 16.04343761 | 33.25 | 3.996235294 |
| 2016 | 31.85265849 | 32.83701312 | 0.871262023 | 2.391524923 | 13.63169206 | 35.8  | 8.421882353 |
| 2016 | 30.43904519 | 29.03519479 | 1.196208749 | 2.757498101 | 15.71773918 | 38.25 | 6.198729412 |
| 2016 | 34.61873536 | 37.43973614 | 0.473550698 | 2.917549187 | 16.63003037 | 38.05 | 8.043576471 |
| 2016 | 28.64797887 | 21.71416672 | 1.483786923 | 3.166657233 | 18.04994623 | 34.25 | 5.315529412 |
| 2016 | 30.02314581 | 18.85870262 | 1.417332352 | 2.515237971 | 14.33685643 | 35.4  | 3.470352941 |
| 2016 | 42.65557095 | 40.89347156 | 1.37481786  | 2.410751164 | 13.74128164 | 34.8  | 4.281247059 |
| 2016 | 35.887243   | 31.20574807 | 1.561791191 | 2.852886586 | 16.26145354 | 37.1  |             |
| 2016 | 41.13365077 | 35.63143625 | 1.737220518 | 2.873293111 | 16.37777074 | 36.9  | 4.727058824 |
| 2016 | 39.51602117 | 32.12451652 | 2.005452913 | 3.033142002 | 17.28890941 | 34.3  | 3.977882353 |
| 2016 | 26.32498452 | 27.91693803 | 1.13409014  | 2.773173653 | 15.80708982 | 39    | 6.470588235 |
| 2016 | 34.75242772 | 32.5457578  | 1.589848147 | 2.875998817 | 16.39319326 | 39.8  | 5.898529412 |
| 2016 | 22.50244512 | 26.11675785 | 1.87014637  | 2.78896797  | 15.89711743 | 36    | 5.0898      |
| 2016 | 27.27228354 | 29.42207721 | 2.109432183 | 4.883024511 | 27.83323971 | 36.5  | 4.446588235 |



|      |             |             |             |             |             |       |             |
|------|-------------|-------------|-------------|-------------|-------------|-------|-------------|
| 2016 | 32.47949998 | 27.53377109 | 1.651883128 | 2.977830883 | 16.97363603 | 38.05 | 4.508576471 |
| 2016 | 30.06733279 | 27.64046681 | 1.422055047 | 2.183002203 | 12.44311256 | 37.25 | 3.676235294 |
| 2016 | 35.28311787 | 45.32036942 | 1.652626584 | 2.947744469 | 16.80214347 | 36.6  | 3.357176471 |
| 2016 | 30.17324489 | 37.83591227 | 1.556147371 | 2.071626641 | 11.80827185 | 40.05 | 3.752705882 |
| 2016 | 40.99704764 | 42.71935336 | 1.461599499 | 2.547408077 | 14.52022604 | 37.25 |             |
| 2016 | 29.71457013 | 34.83471412 | 1.509957387 | 2.880687499 | 16.41991875 | 32.7  | 3.965176471 |
| 2016 | 34.05477049 | 37.8368225  | 1.4905214   | 2.824039694 | 16.09702626 | 35.5  | 3.821211765 |
| 2016 | 31.93048002 | 42.3240606  | 0.991820675 | 2.511129372 | 14.31343742 | 35    | 4.683388235 |
| 2016 | 39.22987265 | 34.78916386 | 1.291103281 |             |             | 37.2  | 6.174117647 |
| 2016 | 34.79903493 | 28.56770235 | 2.203839859 | 3.392832657 | 19.33914615 | 34.9  | 3.457882353 |
| 2016 | 37.77360388 | 33.75385292 | 1.086642483 | 3.125129503 | 17.81323817 | 38.45 | 5.062588235 |
| 2016 | 32.90969893 | 28.43609399 | 1.564024884 | 2.901397997 | 16.53796858 | 41.25 | 4.862117647 |
| 2016 | 42.79658225 | 40.90132298 | 1.3005896   | 2.063718531 | 11.76319563 | 39.5  | 5.307482353 |
| 2016 | 25.41268051 | 21.41541025 | 1.435200884 | 2.856654696 | 16.28293177 | 40.9  | 4.099764706 |
| 2016 | 38.37575718 | 25.89901129 | 1.487582056 | 2.815567249 | 16.04873332 | 37.1  | 4.280941176 |
| 2016 | 36.18295012 | 28.3290468  | 1.943887953 | 2.525673781 | 14.39634055 | 36.6  | 3.737411765 |
| 2016 | 41.33299617 | 32.71111031 | 1.23551487  | 2.157553091 | 12.29805262 | 34.7  | 3.838164706 |
| 2016 | 27.93840196 | 29.65639173 |             | 3.064068929 | 17.4651929  | 39.35 | 2.836705882 |
| 2016 | 33.76351615 | 35.61298934 | 1.20792213  | 2.781155832 | 15.85258824 | 37.64 |             |
| 2016 | 45.84241802 | 39.49509395 | 1.763993975 | 2.979369722 | 16.98240741 | 35.6  | 4.989082353 |
| 2016 | 25.63405003 | 24.45751436 | 1.599573243 | 2.492090393 | 14.20491524 | 35.6  | 4.493823529 |
| 2016 | 30.68584523 | 25.22499482 | 1.804680297 | 2.143188143 | 12.21617241 | 32.85 | 4.500564706 |
| 2016 | 25.10825469 | 26.69182857 | 1.50504864  | 2.233748264 | 12.7323651  | 35.5  | 3.790894118 |
| 2016 | 33.77652984 | 30.90879206 | 1.18201867  | 2.873400743 | 16.37838423 | 39.35 | 4.637847059 |
| 2016 | 41.94994153 | 35.75951672 | 1.489168144 | 2.324880562 | 13.25181921 | 39.85 | 5.062588235 |
| 2016 |             |             | 1.58434368  | 2.87884524  | 16.40941787 | 39.4  | 5.332517647 |
| 2016 | 32.51881144 | 26.08365111 |             | 2.345764522 | 13.37085778 | 32.5  | 5.199764706 |
| 2016 | 28.07068853 | 25.94960122 | 1.085483465 | 2.826989902 | 16.11384244 | 34.3  | 5.530929412 |
| 2016 | 41.69790541 | 36.09493432 | 0.996320332 | 2.735722596 | 15.5936188  | 33.2  | 4.313235294 |
| 2016 | 31.12874636 | 23.22131393 | 1.162557695 | 1.971005841 | 11.2347333  | 40.1  | 7.283529412 |
| 2016 | 35.40409055 | 34.74723726 | 1.060593061 | 2.374620938 | 13.53533934 | 42.7  | 6.230894118 |
| 2016 | 30.73963086 | 28.61636609 | 1.651484266 | 2.018432012 | 11.50506247 | 38.15 | 3.930211765 |
| 2016 | 33.548641   | 26.1679284  | 1.494444439 | 2.458463162 | 14.01324002 | 40.9  | 4.6656      |

|      |             |             |             |             |             |       |             |
|------|-------------|-------------|-------------|-------------|-------------|-------|-------------|
| 2016 | 37.46616507 | 31.79565352 | 1.228839089 | 2.133490923 | 12.16089826 | 40.2  | 6.530682353 |
| 2016 | 34.82191546 | 35.02657151 | 1.121045719 | 2.74736152  | 15.65996066 | 38.05 | 4.574870588 |
| 2016 | 26.74093651 | 23.79484058 | 1.112514085 | 2.653681321 | 15.12598353 | 35.2  | 3.185494118 |
| 2016 | 26.24760364 | 25.76266337 | 1.000558538 | 2.266463104 | 12.91883969 | 33.2  | 5.430941176 |
| 2016 | 33.39437503 | 29.06406125 | 1.488124737 | 2.695408541 | 15.36382868 | 30.3  | 4.741647059 |
| 2016 | 28.7666918  | 29.18139437 | 1.653299387 |             |             | 29.95 | 5.393294118 |
| 2016 | 39.97702412 | 32.02771538 | 1.205717893 | 2.595590917 | 14.79486823 | 30.6  | 6.766941176 |
| 2016 | 26.10010064 | 23.50348823 | 1.405107365 | 2.201969162 | 12.55122422 | 31.7  | 3.778823529 |
| 2016 | 20.16099918 | 18.39061774 | 1.289534478 | 2.719402645 | 15.50059508 | 33.35 | 3.181188235 |
| 2016 | 39.77398037 | 37.22447911 | 1.292179372 | 2.299703046 | 13.10830736 | 37.35 | 5.051258824 |
| 2016 | 29.26514498 | 30.41614833 | 0.977633627 | 2.531414518 | 14.42906275 | 35.7  | 5.850658824 |
| 2016 | 29.44683156 | 29.4973489  | 1.419049482 | 3.009911429 | 17.15649515 | 34.25 | 4.456058824 |
| 2016 | 27.21810373 | 30.1748004  | 1.35454387  | 2.944277356 | 16.78238093 | 38.25 | 5.131823529 |
| 2016 | 37.45731053 | 31.92442752 | 1.88406344  | 2.845845789 | 16.221321   | 32.25 | 4.503670588 |
| 2016 | 36.13282702 | 35.34230055 | 2.154245354 | 2.807820113 | 16.00457465 | 35.6  | 4.725552941 |
| 2016 | 44.61864559 | 38.59865045 | 1.576458458 | 2.380400983 | 13.56828561 | 34.5  | 4.457047059 |
| 2016 | 43.00186957 | 38.28515629 | 1.183283834 | 2.879297077 | 16.41199334 | 39.1  | 3.126588235 |
| 2016 | 32.76814128 | 21.95555488 | 2.173649481 | 3.100911304 | 17.67519444 | 35.9  | 5.525647059 |
| 2016 | 47.73868581 | 32.1921093  | 1.583058203 | 2.882460373 | 16.43002413 | 38.75 | 4.537058824 |
| 2016 | 25.42953198 | 21.99858964 | 2.099162506 | 2.362815345 | 13.46804747 | 35.55 | 3.882282353 |
| 2016 | 35.7389715  | 26.67326725 | 1.103133256 | 3.40889998  | 19.43072988 | 38.75 | 3.765882353 |
| 2016 | 35.25043027 | 32.20726203 | 1.551187323 | 2.817926568 | 16.06218144 | 36.75 | 4.543764706 |
| 2016 | 50.61238598 | 32.32911745 | 2.132520464 | 3.367203995 | 19.19306277 | 37.3  | 4.598752941 |
| 2016 | 52.51324682 | 28.10972178 | 1.449269389 | 2.99697619  | 17.08276428 | 34.95 | 4.526976471 |
| 2016 | 29.96146643 | 33.44813595 | 1.7633564   | 3.03321019  | 17.28929808 | 34.2  | 6.262941176 |
| 2016 | 39.0844571  | 30.15614131 | 2.125349751 | 2.776558792 | 15.82638511 | 33    | 4.759070588 |
| 2016 | 28.59847185 | 27.87139354 | 1.480000841 | 2.654967475 | 15.13331461 | 38.45 | 5.312470588 |
| 2016 | 32.35028063 | 27.25830914 | 1.183727696 | 2.971265944 | 16.93621588 | 36.95 | 5.592141176 |
| 2016 | 39.80853527 | 38.61169664 | 1.072364115 | 3.026418394 | 17.25058484 | 33.05 | 5.130894118 |
| 2016 | 34.24516384 | 25.94704487 | 1.654444127 | 2.584723857 | 14.73292598 | 37.05 | 5.553741176 |
| 2016 | 29.57136987 | 32.56187837 | 1.580324564 | 2.952025037 | 16.82654271 | 38.05 | 5.596282353 |
| 2016 | 41.13977604 | 30.91830661 | 0.701254151 |             |             | 35.55 | 3.633882353 |
| 2016 | 27.41851399 | 24.39008622 | 0.988450989 | 2.374388608 | 13.53401506 | 30.35 | 5.692729412 |

|      |             |             |             |             |               |       |             |
|------|-------------|-------------|-------------|-------------|---------------|-------|-------------|
| 2016 | 35.5843876  | 23.94763923 | 1.498252048 | 2.979494095 | 16.98311634   | 29.35 | 6.646211765 |
| 2016 | 36.02020252 | 33.27957439 | 1.824082563 | 3.323232972 | 18.94242794   | 26.95 | 4.686482353 |
| 2016 | 40.73385219 | 37.03202155 | 1.586220457 | 3.1157491   | 17.75976987   | 37.25 | 5.024282353 |
| 2016 | 49.88367442 | 35.61312211 | 1.183497483 | 2.75083408  | 15.67975425   | 36.4  | 6.579294118 |
| 2016 | 37.01781495 | 29.14642042 | 1.307346706 | 3.04199188  | 17.33935371   | 35.8  | 3.422035294 |
| 2016 | 31.9154797  | 27.66768849 | 1.379309673 | 2.998392613 | 17.09083789   | 28.65 | 4.977882353 |
| 2016 | 31.36239476 | 24.1723047  | 1.607936867 | 2.192292707 | 12.49606843   | 30    | 4.566058824 |
| 2016 | 36.6299242  | 29.40722445 | 1.387720558 | 2.945107337 | 16.78711182   |       | 4.472847059 |
| 2016 | 47.92950463 | 40.56266643 | 1.167156574 | 2.762498823 | 15.74624329   | 34.05 | 6.386352941 |
| 2016 | 49.439508   | 33.79124342 | 1.473626141 | 2.867161101 | 16.34281827   | 32.4  | 4.750552941 |
| 2016 | 33.79378185 | 32.98415227 | 1.646030745 | 2.799490286 | 15.95709463   | 30.6  | 4.219058824 |
| 2016 | 32.28423848 | 31.45216032 | 1.167846473 | 3.093066671 | 17.63048002   | 33.25 | 3.202823529 |
| 2016 | 40.46321127 | 31.92620017 | 1.458781241 | 2.740499045 | 15.62084456   | 33.75 | 3.157647059 |
| 2016 | 45.32815422 | 39.28951236 | 0.125444303 | 3.340580434 | 19.04130847   | 31.45 | 4.070588235 |
| 2016 | 41.5845889  | 29.41407706 | 1.109849552 | 2.675901153 | 15.25263657   | 31.35 | 4.100611765 |
| 2016 | 31.8224159  | 29.45724955 | 1.569185594 | 2.588972545 | 14.75714351   | 33.35 | 3.602823529 |
| 2016 | 41.34033593 | 27.45697706 | 1.327148991 | 2.781784904 | 15.85617395   | 30.05 |             |
| 2016 | 39.63358868 | 30.20277181 | 1.672423266 | 2.842208527 | 16.2005886    | 31.7  | 3.970729412 |
| 2016 | 56.14271293 | 52.0534131  | 1.605621165 | 2.510845965 | 14.311822     | 31.15 | 5.216564706 |
| 2016 | 30.64988264 | 26.66475751 | 1.489929642 | 3.233680564 | 18.43197922   | 33.3  | 3.219764706 |
| 2016 | 39.20819095 | 35.43276661 | 1.040648572 | 2.886979008 | 16.45578035   | 33.6  | 3.897411765 |
| 2016 | 62.40365568 | 46.50522958 | 1.463074598 |             |               | 31.8  |             |
| 2016 | 56.79298309 | 46.49289793 | 7.492072483 | 2.903098691 | 16.54766254 * |       | 3.551647059 |
| 2016 | 33.82064464 | 26.57280962 | 1.583048317 | 1.369429995 | 7.805750972   | 34.3  | 4.760282353 |
| 2016 | 37.16804791 | 32.87688706 | 1.147861798 |             |               | 33.15 | 4.943152941 |
| 2016 | 40.27167925 | 37.15388245 | 1.691767275 | 2.59292099  | 14.77964964   | 32.3  | 4.893458824 |
| 2016 | 26.65822663 | 27.64458246 | 1.224205595 | 2.797659122 | 15.946657     | 35.45 | 7.727294118 |
| 2016 | 39.83814732 | 30.14071112 | 1.587938841 | 2.747868031 | 15.66284778   | 30.4  | 6.687352941 |
| 2016 | 32.53189958 | 32.3974581  | 1.06323191  | 2.646482428 | 15.08494984   | 34.1  | 4.2024      |
| 2016 | 26.11778271 | 30.98091637 | 1.460564414 | 3.722479934 | 21.21813563   | 34.5  | 5.151       |
| 2016 |             |             |             |             |               |       | 4.824470588 |
| 2016 | 51.77349946 | 58.94654478 | 1.746409105 | 2.980853719 | 16.9908662    | 34.65 | 5.238588235 |
| 2016 | 26.69461312 | 23.80536365 | 1.026939459 | 3.076030111 | 17.53337163   | 31.9  | 4.389647059 |

|      |             |             |             |             |               |       |             |
|------|-------------|-------------|-------------|-------------|---------------|-------|-------------|
| 2016 | 33.79570013 | 31.40859587 | 1.075693516 | 2.233295389 | 12.72978372   | 31.05 | 4.224       |
| 2016 | 35.98375416 | 34.82446406 | 1.238781562 | 3.038359598 | 17.31864971   | 26.75 |             |
| 2016 | 28.03644155 | 25.50719319 | 1.910948254 | 2.487347094 | 14.17787844   | 32.46 | 3.494105882 |
| 2016 |             |             | 1.792226906 | 2.978271567 | 16.97614793   | 33.8  | 4.110117647 |
| 2016 | 35.19933444 | 37.80246598 | 1.524548644 | 3.321661388 | 18.93346991   | 35.4  | 3.047176471 |
| 2016 | 29.86263106 | 25.73765891 | 1.88655315  | 2.743841928 | 15.63989899   | 32.35 | 6.176564706 |
| 2016 | 40.28270186 | 39.75824199 | 1.355718888 | 3.035614719 | 17.3030039    | 32.6  | 6.104       |
| 2016 | 46.10450417 | 40.71113672 | 1.477424158 |             |               | 31.35 | 5.439364706 |
| 2016 | 28.1856769  | 23.09130798 | 1.789093323 | 2.718769445 | 15.49698584   | 26.5  | 4.937317647 |
| 2016 | 44.80666579 | 44.02615657 | 1.791728064 |             |               | 27.55 | 4.596705882 |
| 2016 | 38.1012703  | 35.32574371 | 1.615175842 | 2.395404324 | 13.65380465   | 27.25 | 3.954823529 |
| 2016 | 29.35999139 | 30.0784392  | 1.956346526 | 2.730316021 | 15.56280132   | 28.65 | 5.267294118 |
| 2016 | 38.32367101 | 40.31344405 | 2.386927609 | 2.771523051 | 15.79768139   | 29.4  | 3.375058824 |
| 2016 | 39.0523715  | 42.6749844  | 1.970970036 | 2.869001776 | 16.35331012   | 30.6  | 4.125552941 |
| 2016 | 33.65572462 | 33.14250631 | 1.246688762 | 3.346466144 | 19.07485702   | 27.9  | 5.666964706 |
| 2016 | 37.9536776  | 34.13634102 | 1.906077899 |             |               | 26.55 | 3.219764706 |
| 2016 | 40.28955383 | 51.44976157 | 1.963240012 | 2.479820174 | 14.13497499   | 27.6  | 5.160247059 |
| 2016 | 41.79725304 | 40.8884143  | 1.746131097 | 3.004432015 | 17.12526248   | 31.9  | 4.455235294 |
| 2016 | 47.04534305 | 41.65483383 | 1.469313312 | 2.652919049 | 15.12163858   | 28.35 | 3.747764706 |
| 2016 | 34.8485362  | 40.60819821 | 2.193044985 | 3.105516108 | 17.70144181   | 30.4  | 4.312776471 |
| 2016 | 43.85828096 | 37.94393693 | 1.978258542 | 3.344297285 | 19.06249453   | 30.5  | 4.632847059 |
| 2016 | 40.25516773 | 37.31035961 | 1.171302966 | 2.550044664 | 14.53525458   | 30.8  | 4.192941176 |
| 2016 | 39.73677087 | 34.25410502 | 1.265448612 | 2.63567867  | 15.02336842   | 31.9  |             |
| 2016 | 35.84733032 | 40.5264724  | 1.225202276 | 3.343129006 | 19.05583534   | 29.85 | 4.310188235 |
| 2016 | 16.06443898 | 20.92776669 | 1.625732624 | 2.440925655 | 13.91327624   | 33.6  | 6.472870588 |
| 2016 | 31.06936298 | 32.33151858 | 1.561924127 | 3.166936781 | 18.05153965   | 36.5  | 5.257670588 |
| 2016 | 49.17575588 | 46.18898737 | 1.728510797 | 2.895389554 | 16.50372046   | 31.1  | 4.684470588 |
| 2016 | 36.14737764 | 34.45353285 | 2.140480474 | 2.567706325 | 14.63592605   | 30.15 | 5.521623529 |
| 2016 | 39.98624066 | 45.47597494 | 2.420428548 |             |               | 26.35 | 4.462117647 |
| 2016 | 33.41217836 | 29.4588204  | 1.504189972 | 0.986464438 | 5.622847295   | 26.55 | 3.604294118 |
| 2016 | 39.76682486 | 35.07132779 | 1.541083128 | 2.46476051  | 14.04913491   | 30.9  | 3.064470588 |
| 2016 | 40.07066001 | 41.9002686  | 1.365507687 | 3.131760655 | 17.85103573   | 32.55 | 3.758117647 |
| 2016 | 43.03834203 | 43.8209394  | 1.303780754 | 3.492978786 | 19.90997908 * |       | 4.885552941 |

|      |             |             |             |             |             |       |             |
|------|-------------|-------------|-------------|-------------|-------------|-------|-------------|
| 2016 | 26.04412288 | 26.92300427 | 2.004857051 | 2.60905637  | 14.87162131 | 27.7  | 3.281882353 |
| 2016 | 50.4927182  | 55.33192079 | 1.365801256 |             |             | 28.6  | 3.302588235 |
| 2016 | 32.1223972  | 33.11841414 | 0.76150406  | 2.685327227 | 15.3063652  | 36.1  | 6.227858824 |
| 2016 | 39.45268764 | 37.39494806 | 2.002023201 | 2.672974754 | 15.2359561  | 34.6  | 5.313976471 |
| 2016 | 35.6672995  | 30.49800016 | 1.418017147 | 1.306639235 | 7.447843642 | 32.65 | 5.354541176 |
| 2016 | 28.42662005 | 33.41826337 | 1.76257059  | 2.840615689 | 16.19150943 | 29.2  | 3.943529412 |
| 2016 | 35.25264602 | 31.60999316 | 0.995267679 | 2.695648888 | 15.36519866 | 29.6  | 4.058741176 |
| 2016 | 37.75819702 | 42.59279193 | 1.073675098 | 3.428564828 | 19.54281952 | 28.1  | 5.709482353 |
| 2016 | 34.19621742 | 30.67429098 | 2.265960788 |             |             | 22.15 | 3.809882353 |
| 2016 | 31.69400783 | 32.00903055 | 1.991752844 | 3.010747897 | 17.16126301 | 29.55 | 3.033411765 |
| 2016 | 33.40608728 | 38.46591494 | 1.720328338 | 3.313986172 | 18.88972118 | 29.4  | 2.805647059 |
| 2016 | 35.02271774 | 41.83818859 |             |             | 13.54       | 37.5  | 9.060042743 |
| 2016 | 37.36054229 | 40.81657577 |             |             | 14.74       | 36.53 | 7.288893708 |
| 2016 | 35.80740097 | 40.161969   |             |             | 13.68       | 39.4  | 7.875146999 |
| 2016 | 35.47814015 | 36.21433524 |             |             | 14.06       | 39.8  | 8.613691395 |
| 2016 | 32.87316513 | 37.49094928 |             |             | 13.18       | 34.8  | 8.565225372 |
| 2016 | 31.38469641 | 35.44649657 |             |             | 12.67       | 31.93 | 6.846973007 |
| 2016 | 35.79515295 | 46.28177977 |             |             | 14.1        | 39.03 | 6.66247631  |
| 2016 | 38.20943476 | 40.69594841 |             |             | 13.45       | 38.2  | 8.764540773 |
| 2016 | 37.1321421  | 42.94856846 |             |             | 13.77       | 40.8  | 7.548919454 |
| 2016 | 39.33093284 | 40.4900671  |             |             | 15.82       | 35.97 | 7.28434522  |
| 2016 | 29.92773217 | 35.6317443  |             |             | 13.65       | 35.9  | 8.31718195  |
| 2016 | 35.69779563 | 42.95239276 |             |             | 13.88       | 40.2  | 7.79670183  |
| 2016 | 35.74561446 | 41.34579769 |             |             | 14.26       | 39.9  | 6.500746062 |
| 2016 | 31.53051548 | 43.31550461 |             |             | 13.14       | 31.97 | 6.368361771 |
| 2016 | 36.01147727 | 45.17715225 |             |             | 13.83       | 35.47 | 6.541988637 |
| 2016 | 33.33863595 | 40.53155184 |             |             | 13.62       | 37.2  | 8.022664662 |
| 2016 | 39.03876049 | 38.62939597 |             |             | 13.54       | 39.1  | 8.564533693 |
| 2016 |             |             |             | *           | *           |       |             |
| 2016 | 35.45536428 | 41.10013896 |             |             | 14.01       | 35.9  | 8.231761625 |
| 2016 | 33.4968204  | 37.42067795 |             |             | 13.3        | 36.3  | 7.367529391 |
| 2016 | 29.68831896 | 40.7663928  |             |             | 13.53       | 34.13 | 6.903548846 |
| 2016 | 40.72055042 | 48.72064044 |             |             | 15.98       | 36.3  | 6.480027659 |

|      |             |             |       |       |             |
|------|-------------|-------------|-------|-------|-------------|
| 2016 | 36.61238177 | 42.78713909 | 14.46 | 34.23 | 6.874943781 |
| 2016 | 37.99946327 | 46.20667156 | 15.19 | 35.3  | 7.895173926 |
| 2016 | 34.21693287 | 45.66192313 | 15.95 | 34.17 | 6.009410699 |
| 2016 | 38.4314248  | 48.88872355 | 14.4  | 36.33 | 7.003072215 |
| 2016 | 29.32208567 | 42.55741605 | 14.05 | 36.27 | 6.146153358 |
| 2016 | 29.2166392  | 37.79653812 | 12.87 | 36.33 | 6.764092338 |
| 2016 | 33.95328547 | 38.48680456 | 15.21 | 41.63 | 7.427383937 |
| 2016 | 26.96802929 | 37.75459789 | 14.33 | 41.57 | 8.205537381 |
| 2016 | 27.21488292 | 36.06394985 | 14.03 | 36.57 | 7.367199603 |
| 2016 | 29.13575364 | 41.4195698  | 14.2  | 35    | 5.437559832 |
| 2016 | 32.26468249 | 43.05427802 | 13.78 | 37.07 | 7.77346367  |
| 2016 | 29.98437649 | 36.20526567 | 15.08 | 39.43 | 8.091807363 |
| 2016 | 29.79829451 | 39.73976609 | 13.27 | 40.57 | 6.756056016 |
| 2016 | 33.53845562 | 42.57174942 | 13.96 | 35.63 | 7.017709739 |
| 2016 | 38.24166449 | 45.29615723 | 15.06 | 39.23 | 7.172271942 |
| 2016 |             |             | *     | *     |             |
| 2016 | 34.59807036 | 44.6781286  | 14.14 | 44.03 | 8.016823748 |
| 2016 | 29.26596751 | 41.09585192 | 13.67 | 36.53 | 8.141712808 |
| 2016 | 34.0266607  | 42.73345319 | 14.24 | 34.87 | 6.501687787 |
| 2016 | 36.98698566 | 43.44465556 | 13.92 | 35.03 | 8.674647925 |
| 2016 | 29.72649956 | 44.75385692 | 14.37 | 35.37 | 8.042511988 |
| 2016 | 32.54420211 | 39.97731598 | 12.75 | 33.83 | 7.2783115   |
| 2016 | 33.1238412  | 40.37729485 | 13.89 | 34.63 | 7.62237577  |
| 2016 | 30.14811229 | 39.68904884 | 13.1  | 36.3  | 9.47086879  |
| 2016 | 28.29162778 | 38.15207154 | 13.63 | 32.47 | 7.025962924 |
| 2016 | 31.8752742  | 40.43998007 | 13.98 | 37.37 | 8.286042567 |
| 2016 | 34.84748504 | 41.30269551 | 13.74 | 34.83 | 8.066121654 |
| 2016 | 33.49503999 | 44.23528777 | 13.17 | 34.27 | 5.628550022 |
| 2016 | 29.75859255 | 44.50977272 | 13.37 | 33.27 | 7.157680818 |
| 2016 | 29.40560996 | 38.84229299 | 12.97 | 36.73 | 8.736242639 |
| 2016 | 34.03020296 | 43.07421775 | 14.13 | 39.4  | 5.351901708 |
| 2016 | 32.28067421 | 41.48767631 | 14    | 39.4  | 6.609996607 |
| 2016 | 30.64649917 | 38.1186843  | 12.78 | 40.47 | 6.891941488 |

|      |             |             |       |       |             |
|------|-------------|-------------|-------|-------|-------------|
| 2016 | 27.23055775 | 36.02535467 | 13.78 | 37.37 | 5.51638307  |
| 2016 | 29.7369769  | 36.61658053 | 12.82 | 33.63 | 7.451894306 |
| 2016 | 31.82577132 | 43.38349559 | 12.78 | 36.93 | 7.104707562 |
| 2016 | 32.56974248 | 40.64731191 | 14.62 | 38.03 | 5.073166063 |
| 2016 | 33.0457791  | 42.90459519 | 13.69 | 41.47 | 7.264093118 |
| 2016 | 33.32655393 | 39.43778334 | 13.95 | 36.47 | 6.217306607 |
| 2016 | 27.99598746 | 42.57250649 | 13.44 | 42.77 | 6.388930411 |
| 2016 | 28.87694834 | 37.74778726 | 12.67 | 40.33 | 7.683034142 |
| 2016 | 30.90984251 | 43.2598512  | 15.03 | 37.3  | 4.974846882 |
| 2016 | 26.36278513 | 37.67745277 | 12.88 | 40.3  | 7.82432777  |
| 2016 | 32.82894662 | 40.4753773  | 13.39 | 39.17 | 7.072729328 |
| 2016 | 33.74955272 | 37.92926581 | 12.6  | 38.07 | 9.662184483 |
| 2016 | 28.96890153 | 31.79355857 | 13.63 | 34.1  | 8.666550102 |
| 2016 | 31.11780419 | 38.18355762 | 13.94 | 32.73 | 6.943896132 |
| 2016 | 31.74968792 | 34.04787132 | 12.7  | 36.93 | 8.35579034  |
| 2016 |             |             | *     | *     |             |
| 2016 | 30.16664614 | 33.77267281 | 13.05 | 35.5  | 8.233589701 |
| 2016 | 33.19830846 | 37.00453853 | 13.3  | 32.97 | 7.323271085 |
| 2016 | 33.45786586 | 37.05111764 | 13.44 | 39.33 | 8.072829395 |
| 2016 | 29.0737715  | 36.6517297  | 12.43 | 36.37 | 8.662422879 |
| 2016 | 31.74065024 | 38.9324485  | 12.91 | 30.23 | 7.301793888 |
| 2016 | 24.96656765 | 33.85370506 | 12.2  | 34.67 | 7.46926947  |
| 2016 | 29.57538851 | 37.4825462  | 12.92 | 35.9  | 6.92862276  |
| 2016 | 31.83970666 | 39.66838608 | 13.38 | 30    | 6.366988136 |
| 2016 | 30.03964876 | 38.69920387 | 13.76 | 33.07 | 6.683183737 |
| 2016 | 28.4818762  | 34.35543172 | 12.8  | 37.2  | 6.458850048 |
| 2016 | 32.87695254 | 36.94499927 | 13.48 | 33.9  | 6.503381887 |
| 2016 | 31.60411158 | 37.42454495 | 13.96 | 29.77 | 6.961360002 |
| 2016 | 34.01108463 | 43.74174871 | 13.6  | 32.77 | 6.20032     |
| 2016 | 35.65191754 | 41.54293608 | 14.54 | 31.1  | 6.823142356 |
| 2016 | 34.93354959 | 42.80727497 | 13.81 | 35    | 7.624989043 |
| 2016 | 27.97177106 | 33.37934064 | 14.19 | 31.6  | 6.417801911 |
| 2016 | 30.52976738 | 37.21483473 | 12.66 | 33.67 | 6.653731405 |

|      |             |             |       |       |             |
|------|-------------|-------------|-------|-------|-------------|
| 2016 | 29.24944297 | 35.90485534 | 13.24 | 31.63 | 6.61966753  |
| 2016 | 29.14432288 | 34.50496015 | 13.19 | 32.93 | 6.086534829 |
| 2016 | 29.98954445 | 36.598972   | 12.63 | 31.93 | 6.371499696 |
| 2016 | 30.25395298 | 40.79583539 | 14.67 | 32.55 | 6.672778341 |
| 2016 | 31.17914603 | 39.72973343 | 12.95 | 38.93 | 7.557125365 |
| 2016 | 36.66999561 | 43.96515843 | 14.05 | 39.1  | 6.866050096 |
| 2016 | 31.96445585 | 37.73323246 | 13.59 | 36.93 | 7.30246873  |
| 2016 | 33.28754681 | 37.49063747 | 13.64 | 36.67 | 7.344059378 |
| 2016 | 29.7028711  | 41.78052272 | 14.38 | 41.93 | 6.465397771 |
| 2016 | 27.56801483 | 36.62337473 | 11.98 | 37.6  | 8.329549701 |
| 2016 | 37.72661127 | 46.3114961  | 15.16 | 36.37 | 7.110809533 |
| 2016 | 31.19784771 | 38.67181891 | 13.56 | 34.8  | 7.548165185 |
| 2016 | 30.09863736 | 38.14767598 | 13.24 | 37.63 | 8.049878032 |
| 2016 | 30.10589924 | 41.09172466 | 14.63 | 31.57 | 6.400728296 |
| 2016 | 31.29437353 | 36.33053591 | 13.09 | 38.23 | 6.544411993 |
| 2016 | 31.63024502 | 34.52775044 | 13.34 | 37.77 | 8.104744752 |
| 2016 | 29.25518603 | 38.67520373 | 13.2  | 39.47 | 7.99742946  |
| 2016 | 30.65550538 | 42.01647974 | 14.36 | 37.03 | 6.773039713 |
| 2016 | 29.20405145 | 39.21331098 | 14.26 | 41    | 6.78223715  |
| 2016 |             |             | *     | *     |             |
| 2016 | 29.73986746 | 35.117723   | 13.64 | 39.53 | 8.222508718 |
| 2016 | 29.4320652  | 41.07534934 | 13.82 | 37.67 | 8.305168126 |
| 2016 | 31.81741447 | 38.81389809 | 15.18 | 33.27 | 4.886448974 |
| 2016 | 29.54047579 | 35.46086148 | 13.85 | 35.13 | 8.026398912 |
| 2016 | 26.92974261 | 38.57980077 | 13.11 | 36.33 | 8.191190652 |
| 2016 | 33.83285797 | 40.40113125 | 14.72 | 36.07 | 8.499522623 |
| 2016 | 26.29027932 | 39.5580532  | 13.72 | 36.57 | 6.163447965 |
| 2016 | 27.43943158 | 34.85025695 | 13.02 | 37.43 | 7.640802944 |
| 2016 | 33.04554561 | 40.77264867 | 14.49 | 34.47 | 8.949206246 |
| 2016 |             |             | *     | *     |             |
| 2016 | 35.98218145 | 41.24676871 | 13.69 | 33.2  | 7.689240458 |
| 2016 | 24.61710306 | 34.51171693 | 13    | 36.13 | 7.105849825 |
| 2016 | 30.78338482 | 38.46358251 | 12.22 | 35.23 | 7.933515953 |



|      |             |             |   |       |       |             |
|------|-------------|-------------|---|-------|-------|-------------|
| 2016 | 36.35563415 | 39.64162851 |   | 14.09 | 37    | 8.548544463 |
| 2016 | 36.43932078 | 45.77355287 |   | 13.96 | 38.73 | 7.17479807  |
| 2016 | 32.66608071 | 44.11955305 |   | 14.03 | 36.83 | 8.543452561 |
| 2016 | 30.5153359  | 38.49805558 |   | 12.54 | 39.67 | 9.755958405 |
| 2016 | 35.00632774 | 49.47393896 |   | 14.75 | 38.23 | 7.264041862 |
| 2016 | 34.06417685 | 39.21886365 |   | 13.63 | 35.67 | 8.36936018  |
| 2016 | 33.72816425 | 38.8035449  |   | 13.05 | 36.37 | 8.642794879 |
| 2016 | 29.6738632  | 37.6580624  |   | 14    | 34.23 | 7.330808911 |
| 2016 | 33.52466023 | 44.58209524 |   | 14.51 | 43.93 | 9.217489735 |
| 2016 | 28.76339152 | 39.13345171 |   | 14.17 | 35.63 | 7.048455576 |
| 2016 | 33.26199361 | 36.92224526 |   | 14.43 | 38    | 7.054352461 |
| 2016 | 32.14939622 | 39.0150203  |   | 14.33 | 37.27 | 7.726763861 |
| 2016 | 34.03313161 | 40.78543888 |   | 14.95 | 37.97 | 8.042773485 |
| 2016 | 36.21920672 | 40.59764308 |   | 14.96 | 38.73 | 7.224034965 |
| 2016 | 32.56845557 | 42.38011565 |   | 13.63 | 40.63 | 6.36091614  |
| 2016 | 31.14050887 | 41.43029527 |   | 14.52 | 39.03 | 8.161459507 |
| 2016 | 24.91646311 | 33.49295183 |   | 14.24 | 36.77 | 7.060865033 |
| 2016 |             |             | * |       | *     |             |
| 2016 | 31.72304086 | 44.04411224 |   | 14.75 | 41    | 6.835816154 |
| 2016 | 28.67992311 | 40.07323942 |   | 14.75 | 38.77 | 6.60464681  |
| 2016 | 31.15667843 | 38.39312605 |   | 12.86 | 41.53 | 7.117674116 |
| 2016 |             |             | * |       | *     |             |
| 2016 | 31.6241296  | 44.40166329 |   | 14.55 | 39.03 | 5.554685818 |
| 2016 | 35.51307088 | 37.81050378 |   | 14.18 | 41.13 | 7.159739098 |
| 2016 | 33.08508787 | 40.49307642 |   | 13.88 | 37.73 | 5.255202215 |
| 2016 | 36.73522692 | 42.52322238 |   | 14    | 38.63 | 6.049049466 |
| 2016 | 35.47572888 | 42.31388646 |   | 14.44 | 35    | 5.450851464 |
| 2016 | 28.44083489 | 38.4529623  |   | 14.08 | 37.93 | 5.559294689 |
| 2016 | 38.95518901 | 42.64150988 |   | 15.02 | 37.87 | 5.209503092 |
| 2016 | 36.2699238  | 38.15685438 |   | 14.04 | 35.97 | 5.975512624 |
| 2016 | 36.44759395 | 38.5603707  |   | 14.65 | 38.9  | 5.916015339 |
| 2016 | 29.59054054 | 38.59047499 |   | 13.71 | 36.8  | 5.249364523 |
| 2016 | 34.85778342 | 43.40682914 |   | 14.84 | 35.53 | 5.296414996 |

|      |             |             |   |       |       |             |
|------|-------------|-------------|---|-------|-------|-------------|
| 2016 | 31.30677614 | 36.83163238 |   | 13.69 | 39.33 | 5.631953042 |
| 2016 | 31.31295508 | 41.06008888 |   | 13.99 | 39.47 | 7.266338833 |
| 2016 | 34.06063529 | 40.82285632 |   | 14.6  | 42.23 | 7.074713532 |
| 2016 | 28.49991066 | 40.86947871 |   | 13.54 | 40.9  | 8.015246748 |
| 2016 | 28.73383602 | 34.19690786 |   | 13.43 | 38.63 | 7.867572814 |
| 2016 | 35.07322587 | 40.61246464 |   | 13.55 | 40.97 | 7.600575143 |
| 2016 | 24.93232037 | 34.13238576 |   | 13.36 | 42.13 | 7.414847589 |
| 2016 | 30.8142738  | 42.4468721  |   | 14.56 | 38.4  | 6.062254996 |
| 2016 |             |             | * |       | *     |             |
| 2016 | 31.10005786 | 38.17379549 |   | 14.57 | 41.53 | 6.397028828 |
| 2016 | 32.21163249 | 39.66357184 |   | 15.01 | 41.87 | 7.63569328  |
| 2016 | 31.30599959 | 43.54251911 |   | 15.08 | 42.37 | 7.346868763 |
| 2016 | 31.68980944 | 40.58838887 |   | 15.62 | 42.5  | 6.829720792 |
| 2016 | 26.39880789 | 37.52492673 |   | 13.74 | 39.83 | 6.653978931 |
| 2016 | 30.15997695 | 34.54640965 |   | 13.92 | 41.83 | 8.301202996 |
| 2016 | 30.62336756 | 40.32693305 |   | 13.74 | 42    | 6.811484058 |
| 2016 | 30.97223385 | 38.9210047  |   | 13.92 | 40.93 | 7.693144544 |
| 2016 | 34.71696057 | 43.87210609 |   | 14.49 | 40.23 | 7.810616937 |
| 2016 | 31.89853862 | 39.6221448  |   | 12.91 | 40.17 | 8.357899831 |
| 2016 | 30.89404134 | 39.02008167 |   | 15.38 | 37.77 | 6.815313398 |
| 2016 | 33.71020652 | 43.66075323 |   | 14.04 | 46.67 | 7.398394143 |
| 2016 | 33.3488542  | 41.49867882 |   | 15.22 | 39    | 6.155154486 |
| 2016 | 38.56007234 | 38.88435143 |   | 13.05 | 39.13 | 8.218906813 |
| 2016 | 31.06634511 | 38.23391352 |   | 13.53 | 40.97 | 8.047429441 |
| 2016 | 30.22333496 | 37.74543221 |   | 13.77 | 40.5  | 6.94903123  |
| 2016 | 28.06259289 | 38.04811861 |   | 13.86 | 37.23 | 7.251554643 |
| 2016 | 30.63133094 | 36.9110656  |   | 13.67 | 40.5  | 8.740080545 |
| 2016 | 31.09931534 | 40.93554871 |   | 13.91 | 44.03 | 7.569382948 |
| 2016 | 27.71680015 | 39.25873944 |   | 13.28 | 45.03 | 7.263018276 |
| 2016 | 30.56208729 | 40.25550608 |   | 14.02 | 45.47 | 8.479993419 |
| 2016 | 30.41554093 | 44.54245596 |   | 13.36 | 45.17 | 6.428771331 |
| 2016 | 28.69973571 | 42.29352808 |   | 14.18 | 43.23 | 7.889662256 |
| 2016 |             |             | * |       | *     |             |

|      |             |             |       |       |             |
|------|-------------|-------------|-------|-------|-------------|
| 2016 | 32.4145576  | 41.07875398 | 13.45 | 47.7  | 7.615779248 |
| 2016 | 33.26548047 | 41.53252539 | 14.15 | 41.3  | 6.271252847 |
| 2016 | 25.31056442 | 35.13722403 | 13.42 | 40.9  | 8.956691701 |
| 2016 | 34.34141281 | 39.06660852 | 13.73 | 44.23 | 8.545706278 |
| 2016 | 29.61359726 | 39.76404003 | 13.88 | 38.33 | 7.401566685 |
| 2016 | 30.42176553 | 38.58654327 | 13.63 | 42.7  | 8.450778279 |
| 2016 | 28.74915355 | 32.82548149 | 12.77 | 42.6  | 9.054468301 |
| 2016 | 31.03221595 | 35.6291988  | 13.56 | 44.6  | 9.006783417 |
| 2016 | 30.02512006 | 39.4662116  | 13.41 | 45.4  | 7.008082968 |
| 2016 | 28.97155948 | 35.84282037 | 12.78 | 39.57 | 7.592378776 |
| 2016 | 25.78893808 | 33.52188219 | 12.8  | 36.27 | 8.019468371 |
| 2016 | 28.57204088 | 32.77220383 | 12.87 | 38.6  | 7.687013968 |
| 2016 | 29.76657171 | 34.7366795  | 13.8  | 43.13 | 8.543623829 |
| 2016 | 33.56883217 | 37.42563921 | 14.13 | 39.73 | 6.945403145 |
| 2016 | 31.04198552 | 36.99720884 | 13.93 | 41.13 | 7.327963113 |
| 2016 | 31.25586586 | 35.48360332 | 14.19 | 40.5  | 7.813664307 |
| 2016 | 28.54490696 | 36.74534271 | 13.87 | 38.6  | 7.562013081 |
| 2016 | 29.41735376 | 35.34023063 | 14    | 37.07 | 9.046627183 |
| 2016 | 30.0682273  | 38.9527237  | 13.59 | 42    | 8.384925922 |
| 2016 | 29.67287118 | 33.74728023 | 13.85 | 44.47 | 8.560000624 |
| 2016 | 30.71096688 | 40.60705972 | 13.58 | 32.97 | 6.799704076 |
| 2016 | 37.76825883 | 43.42710793 | 15.28 | 32.57 | 6.043382523 |
| 2016 | 36.61962768 | 46.6446573  | 14.62 | 33.97 | 6.632329028 |
| 2016 | 33.23143959 | 41.69932724 | 14.25 | 34.2  | 7.004437909 |
| 2016 | 37.27379464 | 45.75188864 | 15.05 | 34.9  | 6.499970042 |
| 2016 | 29.39728833 | 37.50728739 | 13.39 | 35.47 | 6.831022218 |
| 2016 |             |             | *     | *     |             |
| 2016 | 33.71973575 | 37.65613718 | 14.31 | 34.07 | 6.620235276 |
| 2016 | 36.10527525 | 41.76371567 | 14.67 | 38.07 | 7.182899728 |
| 2016 | 33.32908106 | 45.02735253 | 13.86 | 34.73 | 8.094689101 |
| 2016 | 30.05027755 | 39.91914466 | 13.51 | 34.23 | 8.051814042 |
| 2016 | 37.31025333 | 48.7205541  | 14.59 | 37.07 | 7.029504854 |
| 2016 | 35.54315096 | 39.2548673  | 14.68 | 36.63 | 7.344896048 |

|      |             |             |   |       |       |             |
|------|-------------|-------------|---|-------|-------|-------------|
| 2016 | 31.0878941  | 35.77335186 |   | 13.01 | 39.27 | 7.921627452 |
| 2016 | 27.13521143 | 31.63769121 |   | 12.15 | 37.37 | 7.44697225  |
| 2016 | 40.59320467 | 52.34133807 |   | 15.89 | 31.8  | 6.960435512 |
| 2016 | 31.48482641 | 40.11991747 |   | 13.64 | 36.37 | 6.278866319 |
| 2016 | 36.28480735 | 42.19402267 |   | 14.96 | 35.83 | 6.998138742 |
| 2016 | 32.9777124  | 39.23144151 |   | 14    | 37.93 | 7.579222228 |
| 2016 | 30.95491724 | 38.43299896 |   | 13.78 | 37.9  | 6.485082487 |
| 2016 | 33.92077239 | 34.09134592 |   | 13    | 38.03 | 8.987455272 |
| 2016 | 31.31629786 | 42.11484987 |   | 13.16 | 38    | 7.081025712 |
| 2016 | 43.23485894 | 49.20197937 |   | 15.74 | 38.6  | 6.914393879 |
| 2016 | 33.24894367 | 39.9169577  |   | 14.25 | 34.3  | 7.026049374 |
| 2016 | 33.78496621 | 40.31175679 |   | 13.62 | 36.5  | 6.227460983 |
| 2016 |             |             | * |       | *     |             |
| 2016 | 33.37804164 | 42.6722829  |   | 12.72 | 29.13 | 6.113295706 |
| 2016 | 30.38954522 | 40.9249143  |   | 13.33 | 33.97 | 6.935435703 |
| 2016 | 39.08276465 | 50.25855831 |   | 14.67 | 29    | 6.812563909 |
| 2016 | 33.29214449 | 42.6518418  |   | 14.53 | 31.83 | 6.965609606 |
| 2016 | 38.44768883 | 47.37695135 |   | 13.96 | 32    | 6.214098753 |
| 2016 | 35.20779086 | 43.77704613 |   | 14.97 | 33.4  | 8.160384611 |
| 2016 | 32.56841276 | 42.32973694 |   | 12.91 | 28.97 | 6.919285971 |
| 2016 | 33.76852766 | 43.47267206 |   | 13.27 | 37.8  | 7.16180976  |
| 2016 | 39.12333258 | 48.16066518 |   | 14.14 | 28.85 | 5.383262224 |
| 2016 | 34.93067066 | 42.31260914 |   | 14.21 | 36.1  | 8.041581981 |
| 2016 | 32.17958346 | 40.23976265 |   | 14.56 | 32.97 | 9.410861317 |
| 2016 | 34.52005291 | 39.56874733 |   | 14.21 | 28.4  | 5.719328515 |
