# Supplementary material for: Novel sources of variation in grain Zinc (Zn) concentration in bread wheat germplasm derived from Watkins landraces
Source: PubMed Central journal article supplement (PMC7048275; doi:10.1371/journal.pone.0229107), 2020-02-28
Supplement: pone.0229107.s003.pdf [file pone.0229107.s003.pdf]

Table S3. Primary data of Zn and Fe concentrations (mg/kg) in wholegrain and white flour of 24 wheat lines grown at Nottingham and Rothamsted sites over

| Sample ID | Sr No | Genotype    | Plot No | Sample_grain wt_g | Sample Vol_ml | Replication | Levels    | H_Zn-H_Fe | H_Zn-L_Fe |
|-----------|-------|-------------|---------|-------------------|---------------|-------------|-----------|-----------|-----------|
| 2         | 144   | PxW566 - 20 | 12      | 0.306             | 15            | R3          | L_Zn-L_Fe |           |           |
| 3         | 141   | PxW291 - 23 | 13      | 0.321             | 15            | R3          | L_Zn-L_Fe |           |           |
| 5         | 127   | PxW7 - 60   | 34      | 0.301             | 15            | R1          | L_Zn-L_Fe |           |           |
| 6         | 136   | PxW291 - 75 | 64      | 0.312             | 15            | R2          | L_Zn-L_Fe |           |           |
| 8         | 69    | PxW291 - 23 | 102     | 0.321             | 15            | R3          | L_Zn-L_Fe |           |           |
| 11        | 131   | PxW299 - 87 | 124     | 0.309             | 15            | R1          | L_Zn-L_Fe |           |           |
| 16        | 132   | PxW566 - 20 | 212     | 0.308             | 15            | R1          | L_Zn-L_Fe |           |           |
| 18        | 67    | PxW7 - 60   | 225     | 0.298             | 15            | R3          | L_Zn-L_Fe |           |           |
| 19        | 134   | PxW273 - 21 | 227     | 0.308             | 15            | R2          | L_Zn-L_Fe |           |           |
| 31        | 140   | PxW273 - 21 | 326     | 0.328             | 15            | R3          | L_Zn-L_Fe |           |           |
| 32        | 70    | PxW291 - 75 | 356     | 0.301             | 15            | R3          | L_Zn-L_Fe |           |           |
| 37        | 62    | PxW273 - 21 | 391     | 0.307             | 15            | R2          | L_Zn-L_Fe |           |           |
| 40        | 60    | PxW566 - 20 | 412     | 0.305             | 15            | R1          | L_Zn-L_Fe |           |           |
| 50        | 143   | PxW299 - 87 | 429     | 0.317             | 15            | R3          | L_Zn-L_Fe |           |           |
| 53        | 135   | PxW291 - 23 | 441     | 0.31              | 15            | R2          | L_Zn-L_Fe |           |           |
| 61        | 56    | PxW273 - 21 | 553     | 0.312             | 15            | R1          | L_Zn-L_Fe |           |           |
| 64        | 133   | PxW7 - 60   | 564     | 0.313             | 15            | R2          | L_Zn-L_Fe |           |           |
| 65        | 137   | PxW299 - 87 | 574     | 0.313             | 15            | R2          | L_Zn-L_Fe |           |           |
| 68        | 68    | PxW273 - 21 | 603     | 0.307             | 15            | R3          | L_Zn-L_Fe |           |           |
| 70        | 129   | PxW291 - 23 | 621     | 0.312             | 15            | R1          | L_Zn-L_Fe |           |           |
| 72        | 61    | PxW7 - 60   | 633     | 0.305             | 15            | R2          | L_Zn-L_Fe |           |           |
| 73        | 128   | PxW273 - 21 | 643     | 0.304             | 15            | R1          | L_Zn-L_Fe |           |           |
| 77        | 142   | PxW291 - 75 | 661     | 0.317             | 15            | R3          | L_Zn-L_Fe |           |           |
| 78        | 59    | PxW299 - 87 | 664     | 0.309             | 15            | R1          | L_Zn-L_Fe |           |           |
| 81        | 66    | PxW566 - 20 | 681     | 0.305             | 15            | R2          | L_Zn-L_Fe |           |           |
| 83        | 63    | PxW291 - 23 | 695     | 0.304             | 15            | R2          | L_Zn-L_Fe |           |           |
| 85        | 130   | PxW291 - 75 | 714     | 0.312             | 15            | R1          | L_Zn-L_Fe |           |           |
| 86        | 71    | PxW299 - 87 | 715     | 0.302             | 15            | R3          | L_Zn-L_Fe |           |           |
| 113       | 138   | PxW566 - 20 | 826     | 0.318             | 15            | R2          | L_Zn-L_Fe |           |           |
| 114       | 72    | PxW566 - 20 | 827     | 0.316             | 15            | R3          | L_Zn-L_Fe |           |           |
| 123       | 55    | PxW7 - 60   | 915     | 0.319             | 15            | R1          | L_Zn-L_Fe |           |           |

|     |     |             |      |       |    |    |           |
|-----|-----|-------------|------|-------|----|----|-----------|
| 124 | 139 | PxW7 - 60   | 916  | 0.327 | 15 | R3 | L_Zn-L_Fe |
| 130 | 58  | PxW291 - 75 | 1004 | 0.316 | 15 | R1 | L_Zn-L_Fe |
| 134 | 65  | PxW299 - 87 | 1051 | 0.317 | 15 | R2 | L_Zn-L_Fe |
| 135 | 64  | PxW291 - 75 | 1058 | 0.317 | 15 | R2 | L_Zn-L_Fe |
| 136 | 57  | PxW291 - 23 | 1136 | 0.31  | 15 | R1 | L_Zn-L_Fe |
| 146 | 144 | PxW566 - 20 | 12   | 0.3   | 15 | R3 | L_Zn-L_Fe |
| 147 | 141 | PxW291 - 23 | 13   | 0.304 | 15 | R3 | L_Zn-L_Fe |
| 149 | 127 | PxW7 - 60   | 34   | 0.3   | 15 | R1 | L_Zn-L_Fe |
| 150 | 136 | PxW291 - 75 | 64   | 0.3   | 15 | R2 | L_Zn-L_Fe |
| 152 | 69  | PxW291 - 23 | 102  | 0.31  | 15 | R3 | L_Zn-L_Fe |
| 155 | 131 | PxW299 - 87 | 124  | 0.297 | 15 | R1 | L_Zn-L_Fe |
| 160 | 132 | PxW566 - 20 | 212  | 0.318 | 15 | R1 | L_Zn-L_Fe |
| 162 | 67  | PxW7 - 60   | 225  | 0.307 | 15 | R3 | L_Zn-L_Fe |
| 163 | 134 | PxW273 - 21 | 227  | 0.302 | 15 | R2 | L_Zn-L_Fe |
| 175 | 140 | PxW273 - 21 | 326  | 0.3   | 15 | R3 | L_Zn-L_Fe |
| 176 | 70  | PxW291 - 75 | 356  | 0.3   | 15 | R3 | L_Zn-L_Fe |
| 181 | 62  | PxW273 - 21 | 391  | 0.305 | 15 | R2 | L_Zn-L_Fe |
| 184 | 60  | PxW566 - 20 | 412  | 0.309 | 15 | R1 | L_Zn-L_Fe |
| 194 | 143 | PxW299 - 87 | 429  | 0.305 | 15 | R3 | L_Zn-L_Fe |
| 197 | 135 | PxW291 - 23 | 441  | 0.304 | 15 | R2 | L_Zn-L_Fe |
| 205 | 56  | PxW273 - 21 | 553  | 0.302 | 15 | R1 | L_Zn-L_Fe |
| 208 | 133 | PxW7 - 60   | 564  | 0.303 | 15 | R2 | L_Zn-L_Fe |
| 209 | 137 | PxW299 - 87 | 574  | 0.317 | 15 | R2 | L_Zn-L_Fe |
| 212 | 68  | PxW273 - 21 | 603  | 0.306 | 15 | R3 | L_Zn-L_Fe |
| 214 | 129 | PxW291 - 23 | 621  | 0.3   | 15 | R1 | L_Zn-L_Fe |
| 216 | 61  | PxW7 - 60   | 633  | 0.303 | 15 | R2 | L_Zn-L_Fe |
| 217 | 128 | PxW273 - 21 | 643  | 0.31  | 15 | R1 | L_Zn-L_Fe |
| 221 | 142 | PxW291 - 75 | 661  | 0.311 | 15 | R3 | L_Zn-L_Fe |
| 222 | 59  | PxW299 - 87 | 664  | 0.303 | 15 | R1 | L_Zn-L_Fe |
| 225 | 66  | PxW566 - 20 | 681  | 0.302 | 15 | R2 | L_Zn-L_Fe |
| 227 | 63  | PxW291 - 23 | 695  | 0.301 | 15 | R2 | L_Zn-L_Fe |
| 229 | 130 | PxW291 - 75 | 714  | 0.302 | 15 | R1 | L_Zn-L_Fe |
| 230 | 71  | PxW299 - 87 | 715  | 0.304 | 15 | R3 | L_Zn-L_Fe |

|     |     |             |      |       |    |    |           |
|-----|-----|-------------|------|-------|----|----|-----------|
| 257 | 138 | PxW566 - 20 | 826  | 0.307 | 15 | R2 | L_Zn-L_Fe |
| 258 | 72  | PxW566 - 20 | 827  | 0.305 | 15 | R3 | L_Zn-L_Fe |
| 267 | 55  | PxW7 - 60   | 915  | 0.306 | 15 | R1 | L_Zn-L_Fe |
| 268 | 139 | PxW7 - 60   | 916  | 0.301 | 15 | R3 | L_Zn-L_Fe |
| 274 | 58  | PxW291 - 75 | 1004 | 0.303 | 15 | R1 | L_Zn-L_Fe |
| 278 | 65  | PxW299 - 87 | 1051 | 0.288 | 15 | R2 | L_Zn-L_Fe |
| 279 | 64  | PxW291 - 75 | 1058 | 0.303 | 15 | R2 | L_Zn-L_Fe |
| 280 | 57  | PxW291 - 23 | 1136 | 0.306 | 15 | R1 | L_Zn-L_Fe |
| 5   | 52  | PxW299 - 87 | 121  | 0.313 | 24 | R1 | L_Zn-L_Fe |
| 8   | 46  | PxW291 - 23 | 202  | 0.3   | 24 | R1 | L_Zn-L_Fe |
| 13  | 40  | PxW7 - 60   | 275  | 0.305 | 24 | R1 | L_Zn-L_Fe |
| 15  | 43  | PxW273 - 21 | 332  | 0.31  | 24 | R1 | L_Zn-L_Fe |
| 16  | 49  | PxW291 - 75 | 334  | 0.312 | 24 | R1 | L_Zn-L_Fe |
| 17  | 55  | PxW566 - 20 | 365  | 0.31  | 24 | R1 | L_Zn-L_Fe |
| 24  | 53  | PxW299 - 87 | 857  | 0.303 | 24 | R2 | L_Zn-L_Fe |
| 28  | 47  | PxW291 - 23 | 956  | 0.305 | 24 | R2 | L_Zn-L_Fe |
| 29  | 41  | PxW7 - 60   | 957  | 0.311 | 24 | R2 | L_Zn-L_Fe |
| 33  | 50  | PxW291 - 75 | 1033 | 0.321 | 24 | R2 | L_Zn-L_Fe |
| 35  | 44  | PxW273 - 21 | 1116 | 0.309 | 24 | R2 | L_Zn-L_Fe |
| 38  | 56  | PxW566 - 20 | 1191 | 0.313 | 24 | R2 | L_Zn-L_Fe |
| 39  | 48  | PxW291 - 23 | 1206 | 0.307 | 24 | R3 | L_Zn-L_Fe |
| 43  | 42  | PxW7 - 60   | 1397 | 0.311 | 24 | R3 | L_Zn-L_Fe |
| 44  | 57  | PxW566 - 20 | 1407 | 0.315 | 24 | R3 | L_Zn-L_Fe |
| 52  | 51  | PxW291 - 75 | 1529 | 0.321 | 24 | R3 | L_Zn-L_Fe |
| 53  | 54  | PxW299 - 87 | 1546 | 0.308 | 24 | R3 | L_Zn-L_Fe |
| 56  | 45  | PxW273 - 21 | 1550 | 0.31  | 24 | R3 | L_Zn-L_Fe |
| 59  | 109 | PxW299 - 87 | 30   | 0.309 | 24 | R1 | L_Zn-L_Fe |
| 60  | 103 | PxW291 - 23 | 37   | 0.301 | 24 | R1 | L_Zn-L_Fe |
| 65  | 112 | PxW566 - 20 | 191  | 0.302 | 24 | R1 | L_Zn-L_Fe |
| 67  | 100 | PxW273 - 21 | 228  | 0.307 | 24 | R1 | L_Zn-L_Fe |
| 69  | 106 | PxW291 - 75 | 292  | 0.311 | 24 | R1 | L_Zn-L_Fe |
| 73  | 97  | PxW7 - 60   | 368  | 0.317 | 24 | R1 | L_Zn-L_Fe |
| 80  | 113 | PxW566 - 20 | 546  | 0.301 | 24 | R2 | L_Zn-L_Fe |

|     |     |             |      |       |    |    |           |
|-----|-----|-------------|------|-------|----|----|-----------|
| 85  | 110 | PxW299 - 87 | 731  | 0.304 | 24 | R2 | L_Zn-L_Fe |
| 90  | 101 | PxW273 - 21 | 769  | 0.309 | 24 | R2 | L_Zn-L_Fe |
| 91  | 107 | PxW291 - 75 | 770  | 0.302 | 24 | R2 | L_Zn-L_Fe |
| 92  | 104 | PxW291 - 23 | 798  | 0.309 | 24 | R2 | L_Zn-L_Fe |
| 94  | 98  | PxW7 - 60   | 805  | 0.309 | 24 | R2 | L_Zn-L_Fe |
| 95  | 114 | PxW566 - 20 | 871  | 0.321 | 24 | R3 | L_Zn-L_Fe |
| 96  | 111 | PxW299 - 87 | 889  | 0.303 | 24 | R3 | L_Zn-L_Fe |
| 99  | 99  | PxW7 - 60   | 920  | 0.314 | 24 | R3 | L_Zn-L_Fe |
| 102 | 105 | PxW291 - 23 | 968  | 0.304 | 24 | R3 | L_Zn-L_Fe |
| 105 | 108 | PxW291 - 75 | 1052 | 0.302 | 24 | R3 | L_Zn-L_Fe |
| 110 | 102 | PxW273 - 21 | 1099 | 0.311 | 24 | R3 | L_Zn-L_Fe |
| 119 | 52  | PxW299 - 87 | 121  | 0.313 | 24 | R1 | L_Zn-L_Fe |
| 122 | 46  | PxW291 - 23 | 202  | 0.313 | 24 | R1 | L_Zn-L_Fe |
| 127 | 40  | PxW7 - 60   | 275  | 0.311 | 24 | R1 | L_Zn-L_Fe |
| 129 | 43  | PxW273 - 21 | 332  | 0.318 | 24 | R1 | L_Zn-L_Fe |
| 130 | 49  | PxW291 - 75 | 334  | 0.318 | 24 | R1 | L_Zn-L_Fe |
| 131 | 55  | PxW566 - 20 | 365  | 0.31  | 24 | R1 | L_Zn-L_Fe |
| 138 | 53  | PxW299 - 87 | 857  | 0.303 | 24 | R2 | L_Zn-L_Fe |
| 142 | 47  | PxW291 - 23 | 956  | 0.312 | 24 | R2 | L_Zn-L_Fe |
| 143 | 41  | PxW7 - 60   | 957  | 0.31  | 24 | R2 | L_Zn-L_Fe |
| 147 | 50  | PxW291 - 75 | 1033 | 0.301 | 24 | R2 | L_Zn-L_Fe |
| 149 | 44  | PxW273 - 21 | 1116 | 0.312 | 24 | R2 | L_Zn-L_Fe |
| 152 | 56  | PxW566 - 20 | 1191 | 0.311 | 24 | R2 | L_Zn-L_Fe |
| 153 | 48  | PxW291 - 23 | 1206 | 0.315 | 24 | R3 | L_Zn-L_Fe |
| 157 | 42  | PxW7 - 60   | 1397 | 0.314 | 24 | R3 | L_Zn-L_Fe |
| 158 | 57  | PxW566 - 20 | 1407 | 0.311 | 24 | R3 | L_Zn-L_Fe |
| 166 | 51  | PxW291 - 75 | 1529 | 0.31  | 24 | R3 | L_Zn-L_Fe |
| 167 | 54  | PxW299 - 87 | 1546 | 0.3   | 24 | R3 | L_Zn-L_Fe |
| 170 | 45  | PxW273 - 21 | 1550 | 0.315 | 24 | R3 | L_Zn-L_Fe |
| 173 | 109 | PxW299 - 87 | 30   | 0.32  | 24 | R1 | L_Zn-L_Fe |
| 174 | 103 | PxW291 - 23 | 37   | 0.307 | 24 | R1 | L_Zn-L_Fe |
| 179 | 112 | PxW566 - 20 | 191  | 0.316 | 24 | R1 | L_Zn-L_Fe |
| 181 | 100 | PxW273 - 21 | 228  | 0.314 | 24 | R1 | L_Zn-L_Fe |

|     |     |             |      |       |    |    |           |
|-----|-----|-------------|------|-------|----|----|-----------|
| 183 | 106 | PxW291 - 75 | 292  | 0.304 | 24 | R1 | L_Zn-L_Fe |
| 187 | 97  | PxW7 - 60   | 368  | 0.313 | 24 | R1 | L_Zn-L_Fe |
| 194 | 113 | PxW566 - 20 | 546  | 0.306 | 24 | R2 | L_Zn-L_Fe |
| 199 | 110 | PxW299 - 87 | 731  | 0.301 | 24 | R2 | L_Zn-L_Fe |
| 204 | 101 | PxW273 - 21 | 769  | 0.305 | 24 | R2 | L_Zn-L_Fe |
| 205 | 107 | PxW291 - 75 | 770  | 0.314 | 24 | R2 | L_Zn-L_Fe |
| 206 | 104 | PxW291 - 23 | 798  | 0.305 | 24 | R2 | L_Zn-L_Fe |
| 208 | 98  | PxW7 - 60   | 805  | 0.307 | 24 | R2 | L_Zn-L_Fe |
| 209 | 114 | PxW566 - 20 | 871  | 0.309 | 24 | R3 | L_Zn-L_Fe |
| 210 | 111 | PxW299 - 87 | 889  | 0.302 | 24 | R3 | L_Zn-L_Fe |
| 213 | 99  | PxW7 - 60   | 920  | 0.306 | 24 | R3 | L_Zn-L_Fe |
| 216 | 105 | PxW291 - 23 | 968  | 0.302 | 24 | R3 | L_Zn-L_Fe |
| 219 | 108 | PxW291 - 75 | 1052 | 0.303 | 24 | R3 | L_Zn-L_Fe |
| 224 | 102 | PxW273 - 21 | 1099 | 0.309 | 24 | R3 | L_Zn-L_Fe |
| 9   | 50  | PxW264 - 50 | 118  | 0.322 | 15 | R3 | L_Zn-H_Fe |
| 13  | 54  | PxW811 - 10 | 130  | 0.302 | 15 | R3 | L_Zn-H_Fe |
| 27  | 40  | PxW398 - 18 | 319  | 0.313 | 15 | R1 | L_Zn-H_Fe |
| 33  | 110 | PxW264 - 50 | 368  | 0.307 | 15 | R1 | L_Zn-H_Fe |
| 36  | 46  | PxW398 - 18 | 388  | 0.305 | 15 | R2 | L_Zn-H_Fe |
| 39  | 37  | PxW223 - 80 | 411  | 0.311 | 15 | R1 | L_Zn-H_Fe |
| 52  | 39  | PxW291 - 39 | 439  | 0.31  | 15 | R1 | L_Zn-H_Fe |
| 58  | 41  | PxW546 - 25 | 524  | 0.307 | 15 | R1 | L_Zn-H_Fe |
| 63  | 43  | PxW223 - 80 | 562  | 0.315 | 15 | R2 | L_Zn-H_Fe |
| 67  | 52  | PxW398 - 18 | 594  | 0.302 | 15 | R3 | L_Zn-H_Fe |
| 71  | 45  | PxW291 - 39 | 629  | 0.312 | 15 | R2 | L_Zn-H_Fe |
| 76  | 38  | PxW264 - 50 | 656  | 0.308 | 15 | R1 | L_Zn-H_Fe |
| 89  | 49  | PxW223 - 80 | 727  | 0.313 | 15 | R3 | L_Zn-H_Fe |
| 99  | 48  | PxW811 - 10 | 751  | 0.312 | 15 | R2 | L_Zn-H_Fe |
| 103 | 122 | PxW264 - 50 | 767  | 0.3   | 15 | R3 | L_Zn-H_Fe |
| 104 | 42  | PxW811 - 10 | 779  | 0.31  | 15 | R1 | L_Zn-H_Fe |
| 109 | 116 | PxW264 - 50 | 817  | 0.3   | 15 | R2 | L_Zn-H_Fe |
| 112 | 51  | PxW291 - 39 | 824  | 0.309 | 15 | R3 | L_Zn-H_Fe |
| 119 | 53  | PxW546 - 25 | 852  | 0.301 | 15 | R3 | L_Zn-H_Fe |

|     |     |             |      |       |    |    |           |
|-----|-----|-------------|------|-------|----|----|-----------|
| 125 | 47  | PxW546 - 25 | 931  | 0.312 | 15 | R2 | L_Zn-H_Fe |
| 133 | 44  | PxW264 - 50 | 1047 | 0.313 | 15 | R2 | L_Zn-H_Fe |
| 153 | 50  | PxW264 - 50 | 118  | 0.306 | 15 | R3 | L_Zn-H_Fe |
| 157 | 54  | PxW811 - 10 | 130  | 0.309 | 15 | R3 | L_Zn-H_Fe |
| 171 | 40  | PxW398 - 18 | 319  | 0.309 | 15 | R1 | L_Zn-H_Fe |
| 177 | 110 | PxW264 - 50 | 368  | 0.302 | 15 | R1 | L_Zn-H_Fe |
| 180 | 46  | PxW398 - 18 | 388  | 0.301 | 15 | R2 | L_Zn-H_Fe |
| 183 | 37  | PxW223 - 80 | 411  | 0.306 | 15 | R1 | L_Zn-H_Fe |
| 196 | 39  | PxW291 - 39 | 439  | 0.302 | 15 | R1 | L_Zn-H_Fe |
| 202 | 41  | PxW546 - 25 | 524  | 0.302 | 15 | R1 | L_Zn-H_Fe |
| 207 | 43  | PxW223 - 80 | 562  | 0.301 | 15 | R2 | L_Zn-H_Fe |
| 211 | 52  | PxW398 - 18 | 594  | 0.302 | 15 | R3 | L_Zn-H_Fe |
| 215 | 45  | PxW291 - 39 | 629  | 0.304 | 15 | R2 | L_Zn-H_Fe |
| 220 | 38  | PxW264 - 50 | 656  | 0.279 | 15 | R1 | L_Zn-H_Fe |
| 233 | 49  | PxW223 - 80 | 727  | 0.3   | 15 | R3 | L_Zn-H_Fe |
| 243 | 48  | PxW811 - 10 | 751  | 0.299 | 15 | R2 | L_Zn-H_Fe |
| 247 | 122 | PxW264 - 50 | 767  | 0.3   | 15 | R3 | L_Zn-H_Fe |
| 248 | 42  | PxW811 - 10 | 779  | 0.292 | 15 | R1 | L_Zn-H_Fe |
| 253 | 116 | PxW264 - 50 | 817  | 0.3   | 15 | R2 | L_Zn-H_Fe |
| 256 | 51  | PxW291 - 39 | 824  | 0.304 | 15 | R3 | L_Zn-H_Fe |
| 263 | 53  | PxW546 - 25 | 852  | 0.311 | 15 | R3 | L_Zn-H_Fe |
| 269 | 47  | PxW546 - 25 | 931  | 0.307 | 15 | R2 | L_Zn-H_Fe |
| 277 | 44  | PxW264 - 50 | 1047 | 0.31  | 15 | R2 | L_Zn-H_Fe |
| 14  | 37  | PxW264 - 50 | 298  | 0.302 | 24 | R1 | L_Zn-H_Fe |
| 36  | 38  | PxW264 - 50 | 1148 | 0.32  | 24 | R2 | L_Zn-H_Fe |
| 55  | 39  | PxW264 - 50 | 1549 | 0.313 | 24 | R3 | L_Zn-H_Fe |
| 63  | 94  | PxW264 - 50 | 150  | 0.309 | 24 | R1 | L_Zn-H_Fe |
| 82  | 95  | PxW264 - 50 | 670  | 0.301 | 24 | R2 | L_Zn-H_Fe |
| 112 | 96  | PxW264 - 50 | 1150 | 0.312 | 24 | R3 | L_Zn-H_Fe |
| 128 | 37  | PxW264 - 50 | 298  | 0.315 | 24 | R1 | L_Zn-H_Fe |
| 150 | 38  | PxW264 - 50 | 1148 | 0.304 | 24 | R2 | L_Zn-H_Fe |
| 169 | 39  | PxW264 - 50 | 1549 | 0.304 | 24 | R3 | L_Zn-H_Fe |
| 177 | 94  | PxW264 - 50 | 150  | 0.309 | 24 | R1 | L_Zn-H_Fe |

|     |     |             |      |       |    |    |           |           |
|-----|-----|-------------|------|-------|----|----|-----------|-----------|
| 196 | 95  | PxW264 - 50 | 670  | 0.307 | 24 | R2 | L_Zn-H_Fe |           |
| 226 | 96  | PxW264 - 50 | 1150 | 0.308 | 24 | R3 | L_Zn-H_Fe |           |
| 1   | 105 | PxW273 - 71 | 4    | 0.307 | 15 | R3 | H_Zn-L_Fe | H_Zn-L_Fe |
| 4   | 31  | PxW254 - 2  | 18   | 0.317 | 15 | R3 | H_Zn-L_Fe | H_Zn-L_Fe |
| 7   | 108 | PxW546 - 24 | 97   | 0.31  | 15 | R3 | H_Zn-L_Fe | H_Zn-L_Fe |
| 20  | 34  | PxW396 - 56 | 229  | 0.311 | 15 | R3 | H_Zn-L_Fe | H_Zn-L_Fe |
| 24  | 101 | PxW546 - 20 | 269  | 0.301 | 15 | R2 | H_Zn-L_Fe | H_Zn-L_Fe |
| 26  | 23  | PxW546 - 20 | 313  | 0.304 | 15 | R1 | H_Zn-L_Fe | H_Zn-L_Fe |
| 29  | 24  | PxW546 - 24 | 320  | 0.318 | 15 | R1 | H_Zn-L_Fe | H_Zn-L_Fe |
| 30  | 30  | PxW546 - 24 | 326  | 0.299 | 15 | R2 | H_Zn-L_Fe | H_Zn-L_Fe |
| 34  | 93  | PxW273 - 71 | 374  | 0.321 | 15 | R1 | H_Zn-L_Fe | H_Zn-L_Fe |
| 42  | 107 | PxW546 - 20 | 423  | 0.301 | 15 | R3 | H_Zn-L_Fe | H_Zn-L_Fe |
| 51  | 104 | PxW264 - 17 | 430  | 0.301 | 15 | R3 | H_Zn-L_Fe | H_Zn-L_Fe |
| 54  | 32  | PxW264 - 17 | 463  | 0.318 | 15 | R3 | H_Zn-L_Fe | H_Zn-L_Fe |
| 55  | 99  | PxW273 - 71 | 488  | 0.313 | 15 | R2 | H_Zn-L_Fe | H_Zn-L_Fe |
| 56  | 103 | PxW254 - 2  | 508  | 0.31  | 15 | R3 | H_Zn-L_Fe | H_Zn-L_Fe |
| 57  | 26  | PxW264 - 17 | 518  | 0.318 | 15 | R2 | H_Zn-L_Fe | H_Zn-L_Fe |
| 69  | 36  | PxW546 - 24 | 618  | 0.315 | 15 | R3 | H_Zn-L_Fe | H_Zn-L_Fe |
| 74  | 21  | PxW273 - 71 | 645  | 0.322 | 15 | R1 | H_Zn-L_Fe | H_Zn-L_Fe |
| 79  | 19  | PxW254 - 2  | 667  | 0.307 | 15 | R1 | H_Zn-L_Fe | H_Zn-L_Fe |
| 84  | 96  | PxW546 - 24 | 703  | 0.317 | 15 | R1 | H_Zn-L_Fe | H_Zn-L_Fe |
| 87  | 92  | PxW264 - 17 | 715  | 0.309 | 15 | R1 | H_Zn-L_Fe | H_Zn-L_Fe |
| 88  | 35  | PxW546 - 20 | 720  | 0.31  | 15 | R3 | H_Zn-L_Fe | H_Zn-L_Fe |
| 92  | 97  | PxW254 - 2  | 742  | 0.318 | 15 | R2 | H_Zn-L_Fe | H_Zn-L_Fe |
| 93  | 29  | PxW546 - 20 | 743  | 0.315 | 15 | R2 | H_Zn-L_Fe | H_Zn-L_Fe |
| 97  | 25  | PxW254 - 2  | 747  | 0.322 | 15 | R2 | H_Zn-L_Fe | H_Zn-L_Fe |
| 105 | 22  | PxW396 - 56 | 789  | 0.314 | 15 | R1 | H_Zn-L_Fe | H_Zn-L_Fe |
| 107 | 28  | PxW396 - 56 | 812  | 0.313 | 15 | R2 | H_Zn-L_Fe | H_Zn-L_Fe |
| 108 | 100 | PxW396 - 56 | 816  | 0.302 | 15 | R2 | H_Zn-L_Fe | H_Zn-L_Fe |
| 111 | 102 | PxW546 - 24 | 823  | 0.312 | 15 | R2 | H_Zn-L_Fe | H_Zn-L_Fe |
| 115 | 33  | PxW273 - 71 | 839  | 0.313 | 15 | R3 | H_Zn-L_Fe | H_Zn-L_Fe |
| 118 | 106 | PxW396 - 56 | 850  | 0.301 | 15 | R3 | H_Zn-L_Fe | H_Zn-L_Fe |
| 121 | 91  | PxW254 - 2  | 870  | 0.315 | 15 | R1 | H_Zn-L_Fe | H_Zn-L_Fe |

|     |     |             |      |       |    |    |           |           |
|-----|-----|-------------|------|-------|----|----|-----------|-----------|
| 122 | 95  | PxW546 - 20 | 874  | 0.306 | 15 | R1 | H_Zn-L_Fe | H_Zn-L_Fe |
| 128 | 98  | PxW264 - 17 | 949  | 0.309 | 15 | R2 | H_Zn-L_Fe | H_Zn-L_Fe |
| 129 | 94  | PxW396 - 56 | 956  | 0.325 | 15 | R1 | H_Zn-L_Fe | H_Zn-L_Fe |
| 131 | 20  | PxW264 - 17 | 1007 | 0.307 | 15 | R1 | H_Zn-L_Fe | H_Zn-L_Fe |
| 138 | 27  | PxW273 - 71 | 1164 | 0.327 | 15 | R2 | H_Zn-L_Fe | H_Zn-L_Fe |
| 145 | 105 | PxW273 - 71 | 4    | 0.305 | 15 | R3 | H_Zn-L_Fe | H_Zn-L_Fe |
| 148 | 31  | PxW254 - 2  | 18   | 0.303 | 15 | R3 | H_Zn-L_Fe | H_Zn-L_Fe |
| 151 | 108 | PxW546 - 24 | 97   | 0.303 | 15 | R3 | H_Zn-L_Fe | H_Zn-L_Fe |
| 164 | 34  | PxW396 - 56 | 229  | 0.31  | 15 | R3 | H_Zn-L_Fe | H_Zn-L_Fe |
| 168 | 101 | PxW546 - 20 | 269  | 0.305 | 15 | R2 | H_Zn-L_Fe | H_Zn-L_Fe |
| 170 | 23  | PxW546 - 20 | 313  | 0.305 | 15 | R1 | H_Zn-L_Fe | H_Zn-L_Fe |
| 173 | 24  | PxW546 - 24 | 320  | 0.304 | 15 | R1 | H_Zn-L_Fe | H_Zn-L_Fe |
| 174 | 30  | PxW546 - 24 | 326  | 0.302 | 15 | R2 | H_Zn-L_Fe | H_Zn-L_Fe |
| 178 | 93  | PxW273 - 71 | 374  | 0.307 | 15 | R1 | H_Zn-L_Fe | H_Zn-L_Fe |
| 186 | 107 | PxW546 - 20 | 423  | 0.305 | 15 | R3 | H_Zn-L_Fe | H_Zn-L_Fe |
| 195 | 104 | PxW264 - 17 | 430  | 0.309 | 15 | R3 | H_Zn-L_Fe | H_Zn-L_Fe |
| 198 | 32  | PxW264 - 17 | 463  | 0.302 | 15 | R3 | H_Zn-L_Fe | H_Zn-L_Fe |
| 199 | 99  | PxW273 - 71 | 488  | 0.303 | 15 | R2 | H_Zn-L_Fe | H_Zn-L_Fe |
| 200 | 103 | PxW254 - 2  | 508  | 0.304 | 15 | R3 | H_Zn-L_Fe | H_Zn-L_Fe |
| 201 | 26  | PxW264 - 17 | 518  | 0.301 | 15 | R2 | H_Zn-L_Fe | H_Zn-L_Fe |
| 213 | 36  | PxW546 - 24 | 618  | 0.308 | 15 | R3 | H_Zn-L_Fe | H_Zn-L_Fe |
| 218 | 21  | PxW273 - 71 | 645  | 0.303 | 15 | R1 | H_Zn-L_Fe | H_Zn-L_Fe |
| 223 | 19  | PxW254 - 2  | 667  | 0.302 | 15 | R1 | H_Zn-L_Fe | H_Zn-L_Fe |
| 228 | 96  | PxW546 - 24 | 703  | 0.302 | 15 | R1 | H_Zn-L_Fe | H_Zn-L_Fe |
| 231 | 92  | PxW264 - 17 | 715  | 0.302 | 15 | R1 | H_Zn-L_Fe | H_Zn-L_Fe |
| 232 | 35  | PxW546 - 20 | 720  | 0.311 | 15 | R3 | H_Zn-L_Fe | H_Zn-L_Fe |
| 236 | 97  | PxW254 - 2  | 742  | 0.303 | 15 | R2 | H_Zn-L_Fe | H_Zn-L_Fe |
| 237 | 29  | PxW546 - 20 | 743  | 0.305 | 15 | R2 | H_Zn-L_Fe | H_Zn-L_Fe |
| 241 | 25  | PxW254 - 2  | 747  | 0.303 | 15 | R2 | H_Zn-L_Fe | H_Zn-L_Fe |
| 249 | 22  | PxW396 - 56 | 789  | 0.309 | 15 | R1 | H_Zn-L_Fe | H_Zn-L_Fe |
| 251 | 28  | PxW396 - 56 | 812  | 0.3   | 15 | R2 | H_Zn-L_Fe | H_Zn-L_Fe |
| 252 | 100 | PxW396 - 56 | 816  | 0.312 | 15 | R2 | H_Zn-L_Fe | H_Zn-L_Fe |
| 255 | 102 | PxW546 - 24 | 823  | 0.311 | 15 | R2 | H_Zn-L_Fe | H_Zn-L_Fe |



|     |     |             |      |       |    |    |           |           |
|-----|-----|-------------|------|-------|----|----|-----------|-----------|
| 259 | 33  | PxW273 - 71 | 839  | 0.305 | 15 | R3 | H_Zn-L_Fe | H_Zn-L_Fe |
| 262 | 106 | PxW396 - 56 | 850  | 0.308 | 15 | R3 | H_Zn-L_Fe | H_Zn-L_Fe |
| 265 | 91  | PxW254 - 2  | 870  | 0.305 | 15 | R1 | H_Zn-L_Fe | H_Zn-L_Fe |
| 266 | 95  | PxW546 - 20 | 874  | 0.303 | 15 | R1 | H_Zn-L_Fe | H_Zn-L_Fe |
| 272 | 98  | PxW264 - 17 | 949  | 0.299 | 15 | R2 | H_Zn-L_Fe | H_Zn-L_Fe |
| 273 | 94  | PxW396 - 56 | 956  | 0.306 | 15 | R1 | H_Zn-L_Fe | H_Zn-L_Fe |
| 275 | 20  | PxW264 - 17 | 1007 | 0.3   | 15 | R1 | H_Zn-L_Fe | H_Zn-L_Fe |
| 282 | 27  | PxW273 - 71 | 1164 | 0.302 | 15 | R2 | H_Zn-L_Fe | H_Zn-L_Fe |
| 1   | 25  | PxW273 - 71 | 36   | 0.313 | 24 | R1 | H_Zn-L_Fe | H_Zn-L_Fe |
| 2   | 22  | PxW264 - 17 | 48   | 0.332 | 24 | R1 | H_Zn-L_Fe | H_Zn-L_Fe |
| 6   | 31  | PxW546 - 20 | 165  | 0.306 | 24 | R1 | H_Zn-L_Fe | H_Zn-L_Fe |
| 9   | 28  | PxW396 - 56 | 213  | 0.315 | 24 | R1 | H_Zn-L_Fe | H_Zn-L_Fe |
| 11  | 19  | PxW254 - 2  | 265  | 0.302 | 24 | R1 | H_Zn-L_Fe | H_Zn-L_Fe |
| 12  | 34  | PxW546 - 24 | 274  | 0.31  | 24 | R1 | H_Zn-L_Fe | H_Zn-L_Fe |
| 20  | 20  | PxW254 - 2  | 810  | 0.31  | 24 | R2 | H_Zn-L_Fe | H_Zn-L_Fe |
| 21  | 29  | PxW396 - 56 | 825  | 0.314 | 24 | R2 | H_Zn-L_Fe | H_Zn-L_Fe |
| 25  | 23  | PxW264 - 17 | 876  | 0.32  | 24 | R2 | H_Zn-L_Fe | H_Zn-L_Fe |
| 26  | 26  | PxW273 - 71 | 916  | 0.302 | 24 | R2 | H_Zn-L_Fe | H_Zn-L_Fe |
| 31  | 32  | PxW546 - 20 | 1007 | 0.312 | 24 | R2 | H_Zn-L_Fe | H_Zn-L_Fe |
| 32  | 35  | PxW546 - 24 | 1023 | 0.319 | 24 | R2 | H_Zn-L_Fe | H_Zn-L_Fe |
| 40  | 21  | PxW254 - 2  | 1254 | 0.309 | 24 | R3 | H_Zn-L_Fe | H_Zn-L_Fe |
| 42  | 30  | PxW396 - 56 | 1317 | 0.326 | 24 | R3 | H_Zn-L_Fe | H_Zn-L_Fe |
| 45  | 24  | PxW264 - 17 | 1452 | 0.316 | 24 | R3 | H_Zn-L_Fe | H_Zn-L_Fe |
| 46  | 36  | PxW546 - 24 | 1483 | 0.309 | 24 | R3 | H_Zn-L_Fe | H_Zn-L_Fe |
| 48  | 33  | PxW546 - 20 | 1486 | 0.32  | 24 | R3 | H_Zn-L_Fe | H_Zn-L_Fe |
| 57  | 27  | PxW273 - 71 | 1587 | 0.315 | 24 | R3 | H_Zn-L_Fe | H_Zn-L_Fe |
| 58  | 82  | PxW273 - 71 | 23   | 0.327 | 24 | R1 | H_Zn-L_Fe | H_Zn-L_Fe |
| 62  | 76  | PxW254 - 2  | 94   | 0.302 | 24 | R1 | H_Zn-L_Fe | H_Zn-L_Fe |
| 64  | 88  | PxW546 - 20 | 173  | 0.336 | 24 | R1 | H_Zn-L_Fe | H_Zn-L_Fe |
| 70  | 91  | PxW546 - 24 | 313  | 0.324 | 24 | R1 | H_Zn-L_Fe | H_Zn-L_Fe |
| 71  | 79  | PxW264 - 17 | 328  | 0.309 | 24 | R1 | H_Zn-L_Fe | H_Zn-L_Fe |
| 75  | 85  | PxW396 - 56 | 393  | 0.317 | 24 | R1 | H_Zn-L_Fe | H_Zn-L_Fe |
| 78  | 92  | PxW546 - 24 | 456  | 0.305 | 24 | R2 | H_Zn-L_Fe | H_Zn-L_Fe |

|     |    |             |      |       |    |    |           |           |
|-----|----|-------------|------|-------|----|----|-----------|-----------|
| 79  | 80 | PxW264 - 17 | 458  | 0.321 | 24 | R2 | H_Zn-L_Fe | H_Zn-L_Fe |
| 83  | 77 | PxW254 - 2  | 673  | 0.314 | 24 | R2 | H_Zn-L_Fe | H_Zn-L_Fe |
| 86  | 89 | PxW546 - 20 | 732  | 0.312 | 24 | R2 | H_Zn-L_Fe | H_Zn-L_Fe |
| 88  | 86 | PxW396 - 56 | 746  | 0.314 | 24 | R2 | H_Zn-L_Fe | H_Zn-L_Fe |
| 93  | 83 | PxW273 - 71 | 804  | 0.312 | 24 | R2 | H_Zn-L_Fe | H_Zn-L_Fe |
| 97  | 84 | PxW273 - 71 | 890  | 0.322 | 24 | R3 | H_Zn-L_Fe | H_Zn-L_Fe |
| 98  | 81 | PxW264 - 17 | 910  | 0.309 | 24 | R3 | H_Zn-L_Fe | H_Zn-L_Fe |
| 100 | 90 | PxW546 - 20 | 925  | 0.304 | 24 | R3 | H_Zn-L_Fe | H_Zn-L_Fe |
| 101 | 93 | PxW546 - 24 | 951  | 0.317 | 24 | R3 | H_Zn-L_Fe | H_Zn-L_Fe |
| 104 | 87 | PxW396 - 56 | 992  | 0.317 | 24 | R3 | H_Zn-L_Fe | H_Zn-L_Fe |
| 109 | 78 | PxW254 - 2  | 1072 | 0.303 | 24 | R3 | H_Zn-L_Fe | H_Zn-L_Fe |
| 115 | 25 | PxW273 - 71 | 36   | 0.309 | 24 | R1 | H_Zn-L_Fe | H_Zn-L_Fe |
| 116 | 22 | PxW264 - 17 | 48   | 0.312 | 24 | R1 | H_Zn-L_Fe | H_Zn-L_Fe |
| 120 | 31 | PxW546 - 20 | 165  | 0.314 | 24 | R1 | H_Zn-L_Fe | H_Zn-L_Fe |
| 123 | 28 | PxW396 - 56 | 213  | 0.31  | 24 | R1 | H_Zn-L_Fe | H_Zn-L_Fe |
| 125 | 19 | PxW254 - 2  | 265  | 0.305 | 24 | R1 | H_Zn-L_Fe | H_Zn-L_Fe |
| 126 | 34 | PxW546 - 24 | 274  | 0.309 | 24 | R1 | H_Zn-L_Fe | H_Zn-L_Fe |
| 134 | 20 | PxW254 - 2  | 810  | 0.313 | 24 | R2 | H_Zn-L_Fe | H_Zn-L_Fe |
| 135 | 29 | PxW396 - 56 | 825  | 0.313 | 24 | R2 | H_Zn-L_Fe | H_Zn-L_Fe |
| 139 | 23 | PxW264 - 17 | 876  | 0.301 | 24 | R2 | H_Zn-L_Fe | H_Zn-L_Fe |
| 140 | 26 | PxW273 - 71 | 916  | 0.312 | 24 | R2 | H_Zn-L_Fe | H_Zn-L_Fe |
| 145 | 32 | PxW546 - 20 | 1007 | 0.313 | 24 | R2 | H_Zn-L_Fe | H_Zn-L_Fe |
| 146 | 35 | PxW546 - 24 | 1023 | 0.307 | 24 | R2 | H_Zn-L_Fe | H_Zn-L_Fe |
| 154 | 21 | PxW254 - 2  | 1254 | 0.306 | 24 | R3 | H_Zn-L_Fe | H_Zn-L_Fe |
| 156 | 30 | PxW396 - 56 | 1317 | 0.314 | 24 | R3 | H_Zn-L_Fe | H_Zn-L_Fe |
| 159 | 24 | PxW264 - 17 | 1452 | 0.309 | 24 | R3 | H_Zn-L_Fe | H_Zn-L_Fe |
| 160 | 36 | PxW546 - 24 | 1483 | 0.225 | 24 | R3 | H_Zn-L_Fe | H_Zn-L_Fe |
| 162 | 33 | PxW546 - 20 | 1486 | 0.308 | 24 | R3 | H_Zn-L_Fe | H_Zn-L_Fe |
| 171 | 27 | PxW273 - 71 | 1587 | 0.32  | 24 | R3 | H_Zn-L_Fe | H_Zn-L_Fe |
| 172 | 82 | PxW273 - 71 | 23   | 0.306 | 24 | R1 | H_Zn-L_Fe | H_Zn-L_Fe |
| 176 | 76 | PxW254 - 2  | 94   | 0.307 | 24 | R1 | H_Zn-L_Fe | H_Zn-L_Fe |
| 178 | 88 | PxW546 - 20 | 173  | 0.309 | 24 | R1 | H_Zn-L_Fe | H_Zn-L_Fe |
| 184 | 91 | PxW546 - 24 | 313  | 0.316 | 24 | R1 | H_Zn-L_Fe | H_Zn-L_Fe |

|     |    |             |      |       |    |    |           |           |
|-----|----|-------------|------|-------|----|----|-----------|-----------|
| 185 | 79 | PxW264 - 17 | 328  | 0.318 | 24 | R1 | H_Zn-L_Fe | H_Zn-L_Fe |
| 189 | 85 | PxW396 - 56 | 393  | 0.307 | 24 | R1 | H_Zn-L_Fe | H_Zn-L_Fe |
| 192 | 92 | PxW546 - 24 | 456  | 0.306 | 24 | R2 | H_Zn-L_Fe | H_Zn-L_Fe |
| 193 | 80 | PxW264 - 17 | 458  | 0.307 | 24 | R2 | H_Zn-L_Fe | H_Zn-L_Fe |
| 197 | 77 | PxW254 - 2  | 673  | 0.308 | 24 | R2 | H_Zn-L_Fe | H_Zn-L_Fe |
| 200 | 89 | PxW546 - 20 | 732  | 0.305 | 24 | R2 | H_Zn-L_Fe | H_Zn-L_Fe |
| 202 | 86 | PxW396 - 56 | 746  | 0.305 | 24 | R2 | H_Zn-L_Fe | H_Zn-L_Fe |
| 207 | 83 | PxW273 - 71 | 804  | 0.304 | 24 | R2 | H_Zn-L_Fe | H_Zn-L_Fe |
| 211 | 84 | PxW273 - 71 | 890  | 0.306 | 24 | R3 | H_Zn-L_Fe | H_Zn-L_Fe |
| 212 | 81 | PxW264 - 17 | 910  | 0.305 | 24 | R3 | H_Zn-L_Fe | H_Zn-L_Fe |
| 214 | 90 | PxW546 - 20 | 925  | 0.308 | 24 | R3 | H_Zn-L_Fe | H_Zn-L_Fe |
| 215 | 93 | PxW546 - 24 | 951  | 0.306 | 24 | R3 | H_Zn-L_Fe | H_Zn-L_Fe |
| 218 | 87 | PxW396 - 56 | 992  | 0.314 | 24 | R3 | H_Zn-L_Fe | H_Zn-L_Fe |
| 223 | 78 | PxW254 - 2  | 1072 | 0.31  | 24 | R3 | H_Zn-L_Fe | H_Zn-L_Fe |
| 10  | 75 | PxW216 - 88 | 120  | 0.307 | 15 | R1 | H_Zn-H_Fe | H_Zn-H_Fe |
| 12  | 16 | PxW685 - 36 | 126  | 0.325 | 15 | R3 | H_Zn-H_Fe | H_Zn-H_Fe |
| 14  | 17 | PxW811 - 30 | 140  | 0.308 | 15 | R3 | H_Zn-H_Fe | H_Zn-H_Fe |
| 15  | 74 | PxW7-76     | 206  | 0.333 | 15 | R1 | H_Zn-H_Fe | H_Zn-H_Fe |
| 17  | 76 | PxW685 - 36 | 215  | 0.306 | 15 | R1 | H_Zn-H_Fe | H_Zn-H_Fe |
| 21  | 80 | PxW7-76     | 231  | 0.305 | 15 | R2 | H_Zn-H_Fe | H_Zn-H_Fe |
| 22  | 13 | PxW7 - 2    | 247  | 0.316 | 15 | R3 | H_Zn-H_Fe | H_Zn-H_Fe |
| 23  | 87 | PxW216 - 88 | 266  | 0.309 | 15 | R3 | H_Zn-H_Fe | H_Zn-H_Fe |
| 25  | 78 | PxW811 - 83 | 288  | 0.301 | 15 | R1 | H_Zn-H_Fe | H_Zn-H_Fe |
| 28  | 82 | PxW685 - 36 | 319  | 0.317 | 15 | R2 | H_Zn-H_Fe | H_Zn-H_Fe |
| 35  | 84 | PxW811 - 83 | 385  | 0.317 | 15 | R2 | H_Zn-H_Fe | H_Zn-H_Fe |
| 38  | 3  | PxW216 - 88 | 402  | 0.308 | 15 | R1 | H_Zn-H_Fe | H_Zn-H_Fe |
| 41  | 85 | PxW7 - 2    | 421  | 0.306 | 15 | R3 | H_Zn-H_Fe | H_Zn-H_Fe |
| 49  | 2  | PxW7-76     | 425  | 0.315 | 15 | R1 | H_Zn-H_Fe | H_Zn-H_Fe |
| 59  | 81 | PxW216 - 88 | 531  | 0.312 | 15 | R2 | H_Zn-H_Fe | H_Zn-H_Fe |
| 60  | 77 | PxW811 - 30 | 535  | 0.311 | 15 | R1 | H_Zn-H_Fe | H_Zn-H_Fe |
| 62  | 5  | PxW811 - 30 | 557  | 0.308 | 15 | R1 | H_Zn-H_Fe | H_Zn-H_Fe |
| 66  | 90 | PxW811 - 83 | 588  | 0.307 | 15 | R3 | H_Zn-H_Fe | H_Zn-H_Fe |
| 75  | 4  | PxW685 - 36 | 654  | 0.294 | 15 | R1 | H_Zn-H_Fe | H_Zn-H_Fe |

|     |    |             |      |       |    |    |           |           |
|-----|----|-------------|------|-------|----|----|-----------|-----------|
| 80  | 88 | PxW685 - 36 | 667  | 0.306 | 15 | R3 | H_Zn-H_Fe | H_Zn-H_Fe |
| 82  | 7  | PxW7 - 2    | 684  | 0.306 | 15 | R2 | H_Zn-H_Fe | H_Zn-H_Fe |
| 90  | 79 | PxW7 - 2    | 729  | 0.302 | 15 | R2 | H_Zn-H_Fe | H_Zn-H_Fe |
| 91  | 83 | PxW811 - 30 | 737  | 0.3   | 15 | R2 | H_Zn-H_Fe | H_Zn-H_Fe |
| 98  | 12 | PxW811 - 83 | 749  | 0.296 | 15 | R2 | H_Zn-H_Fe | H_Zn-H_Fe |
| 100 | 9  | PxW216 - 88 | 754  | 0.293 | 15 | R2 | H_Zn-H_Fe | H_Zn-H_Fe |
| 101 | 89 | PxW811 - 30 | 758  | 0.305 | 15 | R3 | H_Zn-H_Fe | H_Zn-H_Fe |
| 102 | 86 | PxW7-76     | 765  | 0.3   | 15 | R3 | H_Zn-H_Fe | H_Zn-H_Fe |
| 106 | 73 | PxW7 - 2    | 811  | 0.32  | 15 | R1 | H_Zn-H_Fe | H_Zn-H_Fe |
| 110 | 14 | PxW7-76     | 822  | 0.311 | 15 | R3 | H_Zn-H_Fe | H_Zn-H_Fe |
| 116 | 18 | PxW811 - 83 | 840  | 0.315 | 15 | R3 | H_Zn-H_Fe | H_Zn-H_Fe |
| 117 | 15 | PxW216 - 88 | 843  | 0.313 | 15 | R3 | H_Zn-H_Fe | H_Zn-H_Fe |
| 120 | 8  | PxW7-76     | 869  | 0.312 | 15 | R2 | H_Zn-H_Fe | H_Zn-H_Fe |
| 126 | 10 | PxW685 - 36 | 932  | 0.315 | 15 | R2 | H_Zn-H_Fe | H_Zn-H_Fe |
| 127 | 11 | PxW811 - 30 | 940  | 0.316 | 15 | R2 | H_Zn-H_Fe | H_Zn-H_Fe |
| 132 | 1  | PxW7 - 2    | 1013 | 0.306 | 15 | R1 | H_Zn-H_Fe | H_Zn-H_Fe |
| 137 | 6  | PxW811 - 83 | 1145 | 0.316 | 15 | R1 | H_Zn-H_Fe | H_Zn-H_Fe |
| 154 | 75 | PxW216 - 88 | 120  | 0.302 | 15 | R1 | H_Zn-H_Fe | H_Zn-H_Fe |
| 156 | 16 | PxW685 - 36 | 126  | 0.301 | 15 | R3 | H_Zn-H_Fe | H_Zn-H_Fe |
| 158 | 17 | PxW811 - 30 | 140  | 0.301 | 15 | R3 | H_Zn-H_Fe | H_Zn-H_Fe |
| 159 | 74 | PxW7-76     | 206  | 0.303 | 15 | R1 | H_Zn-H_Fe | H_Zn-H_Fe |
| 161 | 76 | PxW685 - 36 | 215  | 0.301 | 15 | R1 | H_Zn-H_Fe | H_Zn-H_Fe |
| 165 | 80 | PxW7-76     | 231  | 0.302 | 15 | R2 | H_Zn-H_Fe | H_Zn-H_Fe |
| 166 | 13 | PxW7 - 2    | 247  | 0.304 | 15 | R3 | H_Zn-H_Fe | H_Zn-H_Fe |
| 167 | 87 | PxW216 - 88 | 266  | 0.303 | 15 | R3 | H_Zn-H_Fe | H_Zn-H_Fe |
| 169 | 78 | PxW811 - 83 | 288  | 0.3   | 15 | R1 | H_Zn-H_Fe | H_Zn-H_Fe |
| 172 | 82 | PxW685 - 36 | 319  | 0.305 | 15 | R2 | H_Zn-H_Fe | H_Zn-H_Fe |
| 179 | 84 | PxW811 - 83 | 385  | 0.287 | 15 | R2 | H_Zn-H_Fe | H_Zn-H_Fe |
| 182 | 3  | PxW216 - 88 | 402  | 0.302 | 15 | R1 | H_Zn-H_Fe | H_Zn-H_Fe |
| 185 | 85 | PxW7 - 2    | 421  | 0.303 | 15 | R3 | H_Zn-H_Fe | H_Zn-H_Fe |
| 193 | 2  | PxW7-76     | 425  | 0.301 | 15 | R1 | H_Zn-H_Fe | H_Zn-H_Fe |
| 203 | 81 | PxW216 - 88 | 531  | 0.3   | 15 | R2 | H_Zn-H_Fe | H_Zn-H_Fe |
| 204 | 77 | PxW811 - 30 | 535  | 0.302 | 15 | R1 | H_Zn-H_Fe | H_Zn-H_Fe |

|     |    |             |      |       |    |    |           |           |
|-----|----|-------------|------|-------|----|----|-----------|-----------|
| 206 | 5  | Pxw811 - 30 | 557  | 0.308 | 15 | R1 | H_Zn-H_Fe | H_Zn-H_Fe |
| 210 | 90 | Pxw811 - 83 | 588  | 0.303 | 15 | R3 | H_Zn-H_Fe | H_Zn-H_Fe |
| 219 | 4  | Pxw685 - 36 | 654  | 0.301 | 15 | R1 | H_Zn-H_Fe | H_Zn-H_Fe |
| 224 | 88 | Pxw685 - 36 | 667  | 0.306 | 15 | R3 | H_Zn-H_Fe | H_Zn-H_Fe |
| 226 | 7  | Pxw7 - 2    | 684  | 0.312 | 15 | R2 | H_Zn-H_Fe | H_Zn-H_Fe |
| 234 | 79 | Pxw7 - 2    | 729  | 0.304 | 15 | R2 | H_Zn-H_Fe | H_Zn-H_Fe |
| 235 | 83 | Pxw811 - 30 | 737  | 0.309 | 15 | R2 | H_Zn-H_Fe | H_Zn-H_Fe |
| 242 | 12 | Pxw811 - 83 | 749  | 0.297 | 15 | R2 | H_Zn-H_Fe | H_Zn-H_Fe |
| 244 | 9  | Pxw216 - 88 | 754  | 0.303 | 15 | R2 | H_Zn-H_Fe | H_Zn-H_Fe |
| 245 | 89 | Pxw811 - 30 | 758  | 0.302 | 15 | R3 | H_Zn-H_Fe | H_Zn-H_Fe |
| 246 | 86 | Pxw7-76     | 765  | 0.304 | 15 | R3 | H_Zn-H_Fe | H_Zn-H_Fe |
| 250 | 73 | Pxw7 - 2    | 811  | 0.307 | 15 | R1 | H_Zn-H_Fe | H_Zn-H_Fe |
| 254 | 14 | Pxw7-76     | 822  | 0.307 | 15 | R3 | H_Zn-H_Fe | H_Zn-H_Fe |
| 260 | 18 | Pxw811 - 83 | 840  | 0.302 | 15 | R3 | H_Zn-H_Fe | H_Zn-H_Fe |
| 261 | 15 | Pxw216 - 88 | 843  | 0.305 | 15 | R3 | H_Zn-H_Fe | H_Zn-H_Fe |
| 264 | 8  | Pxw7-76     | 869  | 0.305 | 15 | R2 | H_Zn-H_Fe | H_Zn-H_Fe |
| 270 | 10 | Pxw685 - 36 | 932  | 0.305 | 15 | R2 | H_Zn-H_Fe | H_Zn-H_Fe |
| 271 | 11 | Pxw811 - 30 | 940  | 0.302 | 15 | R2 | H_Zn-H_Fe | H_Zn-H_Fe |
| 276 | 1  | Pxw7 - 2    | 1013 | 0.304 | 15 | R1 | H_Zn-H_Fe | H_Zn-H_Fe |
| 281 | 6  | Pxw811 - 83 | 1145 | 0.301 | 15 | R1 | H_Zn-H_Fe | H_Zn-H_Fe |
| 3   | 1  | Pxw7 - 2    | 82   | 0.322 | 24 | R1 | H_Zn-H_Fe | H_Zn-H_Fe |
| 4   | 7  | Pxw216 - 88 | 111  | 0.316 | 24 | R1 | H_Zn-H_Fe | H_Zn-H_Fe |
| 7   | 13 | Pxw811 - 30 | 180  | 0.31  | 24 | R1 | H_Zn-H_Fe | H_Zn-H_Fe |
| 10  | 4  | Pxw7-76     | 238  | 0.305 | 24 | R1 | H_Zn-H_Fe | H_Zn-H_Fe |
| 18  | 10 | Pxw685 - 36 | 396  | 0.309 | 24 | R1 | H_Zn-H_Fe | H_Zn-H_Fe |
| 19  | 16 | Pxw811 - 83 | 397  | 0.305 | 24 | R1 | H_Zn-H_Fe | H_Zn-H_Fe |
| 22  | 8  | Pxw216 - 88 | 826  | 0.32  | 24 | R2 | H_Zn-H_Fe | H_Zn-H_Fe |
| 23  | 14 | Pxw811 - 30 | 854  | 0.316 | 24 | R2 | H_Zn-H_Fe | H_Zn-H_Fe |
| 27  | 11 | Pxw685 - 36 | 925  | 0.3   | 24 | R2 | H_Zn-H_Fe | H_Zn-H_Fe |
| 30  | 2  | Pxw7 - 2    | 987  | 0.308 | 24 | R2 | H_Zn-H_Fe | H_Zn-H_Fe |
| 34  | 5  | Pxw7-76     | 1075 | 0.31  | 24 | R2 | H_Zn-H_Fe | H_Zn-H_Fe |
| 37  | 17 | Pxw811 - 83 | 1156 | 0.308 | 24 | R2 | H_Zn-H_Fe | H_Zn-H_Fe |
| 41  | 9  | Pxw216 - 88 | 1274 | 0.318 | 24 | R3 | H_Zn-H_Fe | H_Zn-H_Fe |

|     |    |             |      |       |    |    |           |           |
|-----|----|-------------|------|-------|----|----|-----------|-----------|
| 47  | 3  | PxW7 - 2    | 1484 | 0.32  | 24 | R3 | H_Zn-H_Fe | H_Zn-H_Fe |
| 49  | 6  | PxW7-76     | 1494 | 0.324 | 24 | R3 | H_Zn-H_Fe | H_Zn-H_Fe |
| 50  | 15 | PxW811 - 30 | 1511 | 0.304 | 24 | R3 | H_Zn-H_Fe | H_Zn-H_Fe |
| 51  | 12 | PxW685 - 36 | 1528 | 0.317 | 24 | R3 | H_Zn-H_Fe | H_Zn-H_Fe |
| 54  | 18 | PxW811 - 83 | 1548 | 0.302 | 24 | R3 | H_Zn-H_Fe | H_Zn-H_Fe |
| 61  | 70 | PxW811 - 30 | 42   | 0.322 | 24 | R1 | H_Zn-H_Fe | H_Zn-H_Fe |
| 66  | 58 | PxW7 - 2    | 212  | 0.315 | 24 | R1 | H_Zn-H_Fe | H_Zn-H_Fe |
| 68  | 73 | PxW811 - 83 | 273  | 0.308 | 24 | R1 | H_Zn-H_Fe | H_Zn-H_Fe |
| 72  | 61 | PxW7-76     | 348  | 0.321 | 24 | R1 | H_Zn-H_Fe | H_Zn-H_Fe |
| 74  | 67 | PxW685 - 36 | 373  | 0.301 | 24 | R1 | H_Zn-H_Fe | H_Zn-H_Fe |
| 76  | 64 | PxW216 - 88 | 400  | 0.317 | 24 | R1 | H_Zn-H_Fe | H_Zn-H_Fe |
| 77  | 62 | PxW7-76     | 415  | 0.306 | 24 | R2 | H_Zn-H_Fe | H_Zn-H_Fe |
| 81  | 68 | PxW685 - 36 | 626  | 0.323 | 24 | R2 | H_Zn-H_Fe | H_Zn-H_Fe |
| 84  | 59 | PxW7 - 2    | 721  | 0.317 | 24 | R2 | H_Zn-H_Fe | H_Zn-H_Fe |
| 87  | 74 | PxW811 - 83 | 733  | 0.308 | 24 | R2 | H_Zn-H_Fe | H_Zn-H_Fe |
| 89  | 65 | PxW216 - 88 | 762  | 0.309 | 24 | R2 | H_Zn-H_Fe | H_Zn-H_Fe |
| 103 | 75 | PxW811 - 83 | 974  | 0.309 | 24 | R3 | H_Zn-H_Fe | H_Zn-H_Fe |
| 106 | 66 | PxW216 - 88 | 1055 | 0.311 | 24 | R3 | H_Zn-H_Fe | H_Zn-H_Fe |
| 107 | 69 | PxW685 - 36 | 1060 | 0.313 | 24 | R3 | H_Zn-H_Fe | H_Zn-H_Fe |
| 108 | 63 | PxW7-76     | 1070 | 0.296 | 24 | R3 | H_Zn-H_Fe | H_Zn-H_Fe |
| 111 | 60 | PxW7 - 2    | 1149 | 0.3   | 24 | R3 | H_Zn-H_Fe | H_Zn-H_Fe |
| 113 | 71 | PxW811 - 30 | 1161 | 0.315 | 24 | R2 | H_Zn-H_Fe | H_Zn-H_Fe |
| 114 | 72 | PxW811 - 30 |      | 0.315 | 24 | R3 | H_Zn-H_Fe | H_Zn-H_Fe |
| 117 | 1  | PxW7 - 2    | 82   | 0.316 | 24 | R1 | H_Zn-H_Fe | H_Zn-H_Fe |
| 118 | 7  | PxW216 - 88 | 111  | 0.31  | 24 | R1 | H_Zn-H_Fe | H_Zn-H_Fe |
| 121 | 13 | PxW811 - 30 | 180  | 0.31  | 24 | R1 | H_Zn-H_Fe | H_Zn-H_Fe |
| 124 | 4  | PxW7-76     | 238  | 0.313 | 24 | R1 | H_Zn-H_Fe | H_Zn-H_Fe |
| 132 | 10 | PxW685 - 36 | 396  | 0.311 | 24 | R1 | H_Zn-H_Fe | H_Zn-H_Fe |
| 133 | 16 | PxW811 - 83 | 397  | 0.286 | 24 | R1 | H_Zn-H_Fe | H_Zn-H_Fe |
| 136 | 8  | PxW216 - 88 | 826  | 0.307 | 24 | R2 | H_Zn-H_Fe | H_Zn-H_Fe |
| 137 | 14 | PxW811 - 30 | 854  | 0.313 | 24 | R2 | H_Zn-H_Fe | H_Zn-H_Fe |
| 141 | 11 | PxW685 - 36 | 925  | 0.301 | 24 | R2 | H_Zn-H_Fe | H_Zn-H_Fe |
| 144 | 2  | PxW7 - 2    | 987  | 0.31  | 24 | R2 | H_Zn-H_Fe | H_Zn-H_Fe |

|     |    |             |      |       |    |    |           |           |
|-----|----|-------------|------|-------|----|----|-----------|-----------|
| 148 | 5  | PxW7-76     | 1075 | 0.305 | 24 | R2 | H_Zn-H_Fe | H_Zn-H_Fe |
| 151 | 17 | PxW811 - 83 | 1156 | 0.314 | 24 | R2 | H_Zn-H_Fe | H_Zn-H_Fe |
| 155 | 9  | PxW216 - 88 | 1274 | 0.312 | 24 | R3 | H_Zn-H_Fe | H_Zn-H_Fe |
| 161 | 3  | PxW7 - 2    | 1484 | 0.301 | 24 | R3 | H_Zn-H_Fe | H_Zn-H_Fe |
| 163 | 6  | PxW7-76     | 1494 | 0.3   | 24 | R3 | H_Zn-H_Fe | H_Zn-H_Fe |
| 164 | 15 | PxW811 - 30 | 1511 | 0.305 | 24 | R3 | H_Zn-H_Fe | H_Zn-H_Fe |
| 165 | 12 | PxW685 - 36 | 1528 | 0.306 | 24 | R3 | H_Zn-H_Fe | H_Zn-H_Fe |
| 168 | 18 | PxW811 - 83 | 1548 | 0.304 | 24 | R3 | H_Zn-H_Fe | H_Zn-H_Fe |
| 175 | 70 | PxW811 - 30 | 42   | 0.306 | 24 | R1 | H_Zn-H_Fe | H_Zn-H_Fe |
| 180 | 58 | PxW7 - 2    | 212  | 0.309 | 24 | R1 | H_Zn-H_Fe | H_Zn-H_Fe |
| 182 | 73 | PxW811 - 83 | 273  | 0.304 | 24 | R1 | H_Zn-H_Fe | H_Zn-H_Fe |
| 186 | 61 | PxW7-76     | 348  | 0.317 | 24 | R1 | H_Zn-H_Fe | H_Zn-H_Fe |
| 188 | 67 | PxW685 - 36 | 373  | 0.307 | 24 | R1 | H_Zn-H_Fe | H_Zn-H_Fe |
| 190 | 64 | PxW216 - 88 | 400  | 0.304 | 24 | R1 | H_Zn-H_Fe | H_Zn-H_Fe |
| 191 | 62 | PxW7-76     | 415  | 0.307 | 24 | R2 | H_Zn-H_Fe | H_Zn-H_Fe |
| 195 | 68 | PxW685 - 36 | 626  | 0.308 | 24 | R2 | H_Zn-H_Fe | H_Zn-H_Fe |
| 198 | 59 | PxW7 - 2    | 721  | 0.304 | 24 | R2 | H_Zn-H_Fe | H_Zn-H_Fe |
| 201 | 74 | PxW811 - 83 | 733  | 0.306 | 24 | R2 | H_Zn-H_Fe | H_Zn-H_Fe |
| 203 | 65 | PxW216 - 88 | 762  | 0.314 | 24 | R2 | H_Zn-H_Fe | H_Zn-H_Fe |
| 217 | 75 | PxW811 - 83 | 974  | 0.304 | 24 | R3 | H_Zn-H_Fe | H_Zn-H_Fe |
| 220 | 66 | PxW216 - 88 | 1055 | 0.313 | 24 | R3 | H_Zn-H_Fe | H_Zn-H_Fe |
| 221 | 69 | PxW685 - 36 | 1060 | 0.308 | 24 | R3 | H_Zn-H_Fe | H_Zn-H_Fe |
| 222 | 63 | PxW7-76     | 1070 | 0.316 | 24 | R3 | H_Zn-H_Fe | H_Zn-H_Fe |
| 225 | 60 | PxW7 - 2    | 1149 | 0.309 | 24 | R3 | H_Zn-H_Fe | H_Zn-H_Fe |
| 227 | 71 | PxW811 - 30 | 1161 | 0.306 | 24 | R2 | H_Zn-H_Fe | H_Zn-H_Fe |
| 228 | 72 | PxW811 - 30 |      | 0.309 | 24 | R3 | H_Zn-H_Fe | H_Zn-H_Fe |

r two years, 2015-19.

| L_Zn-H_FeI | L_Zn-L_FeI | SiteI | UoNl | RresI | YearI | FractionI | GrainI | EndoI | Year_2016I | Year_2017I | Fe_mg_kg_Grain | Zn_mg_kg_Grain |
|------------|------------|-------|------|-------|-------|-----------|--------|-------|------------|------------|----------------|----------------|
| L_Zn-L_Fe  | L_Zn-L_Fe  | Rres  |      | Rres  | 2016  | Grain     | Grain  |       | 2016       |            | 22.69522109    | 29.48632052    |
| L_Zn-L_Fe  | L_Zn-L_Fe  | Rres  |      | Rres  | 2016  | Grain     | Grain  |       | 2016       |            | 25.67474052    | 28.44821471    |
| L_Zn-L_Fe  | L_Zn-L_Fe  | Rres  |      | Rres  | 2016  | Grain     | Grain  |       | 2016       |            | 22.67057334    | 29.69343876    |
| L_Zn-L_Fe  | L_Zn-L_Fe  | Rres  |      | Rres  | 2016  | Grain     | Grain  |       | 2016       |            | 23.88256118    | 32.67052589    |
| L_Zn-L_Fe  | L_Zn-L_Fe  | UoN   | UoN  |       | 2016  | Grain     | Grain  |       | 2016       |            | 21.28275389    | 25.06232415    |
| L_Zn-L_Fe  | L_Zn-L_Fe  | Rres  |      | Rres  | 2016  | Grain     | Grain  |       | 2016       |            | 26.99365805    | 34.91280812    |
| L_Zn-L_Fe  | L_Zn-L_Fe  | Rres  |      | Rres  | 2016  | Grain     | Grain  |       | 2016       |            | 23.7530743     | 31.89595909    |
| L_Zn-L_Fe  | L_Zn-L_Fe  | UoN   | UoN  |       | 2016  | Grain     | Grain  |       | 2016       |            | 24.94879445    | 23.81109339    |
| L_Zn-L_Fe  | L_Zn-L_Fe  | Rres  |      | Rres  | 2016  | Grain     | Grain  |       | 2016       |            | 25.26153719    | 27.85839456    |
| L_Zn-L_Fe  | L_Zn-L_Fe  | Rres  |      | Rres  | 2016  | Grain     | Grain  |       | 2016       |            | 27.36109399    | 40.68573739    |
| L_Zn-L_Fe  | L_Zn-L_Fe  | UoN   | UoN  |       | 2016  | Grain     | Grain  |       | 2016       |            | 22.20248246    | 24.04954278    |
| L_Zn-L_Fe  | L_Zn-L_Fe  | UoN   | UoN  |       | 2016  | Grain     | Grain  |       | 2016       |            | 30.06769449    | 28.05085556    |
| L_Zn-L_Fe  | L_Zn-L_Fe  | UoN   | UoN  |       | 2016  | Grain     | Grain  |       | 2016       |            | 29.02084879    | 31.50887762    |
| L_Zn-L_Fe  | L_Zn-L_Fe  | Rres  |      | Rres  | 2016  | Grain     | Grain  |       | 2016       |            | 24.92012176    | 27.65929684    |
| L_Zn-L_Fe  | L_Zn-L_Fe  | Rres  |      | Rres  | 2016  | Grain     | Grain  |       | 2016       |            | 36.31528891    | 26.46445222    |
| L_Zn-L_Fe  | L_Zn-L_Fe  | UoN   | UoN  |       | 2016  | Grain     | Grain  |       | 2016       |            | 29.04542043    | 21.38031744    |
| L_Zn-L_Fe  | L_Zn-L_Fe  | Rres  |      | Rres  | 2016  | Grain     | Grain  |       | 2016       |            | 36.39970084    | 26.76455519    |
| L_Zn-L_Fe  | L_Zn-L_Fe  | Rres  |      | Rres  | 2016  | Grain     | Grain  |       | 2016       |            | 24.81701978    | 27.74806985    |
| L_Zn-L_Fe  | L_Zn-L_Fe  | UoN   | UoN  |       | 2016  | Grain     | Grain  |       | 2016       |            | 23.84999665    | 19.09536271    |
| L_Zn-L_Fe  | L_Zn-L_Fe  | Rres  |      | Rres  | 2016  | Grain     | Grain  |       | 2016       |            | 24.39593985    | 30.14362966    |
| L_Zn-L_Fe  | L_Zn-L_Fe  | UoN   | UoN  |       | 2016  | Grain     | Grain  |       | 2016       |            | 31.78993225    | 25.82745549    |
| L_Zn-L_Fe  | L_Zn-L_Fe  | Rres  |      | Rres  | 2016  | Grain     | Grain  |       | 2016       |            | 23.02805908    | 31.40666746    |
| L_Zn-L_Fe  | L_Zn-L_Fe  | Rres  |      | Rres  | 2016  | Grain     | Grain  |       | 2016       |            | 24.72586409    | 30.42349948    |
| L_Zn-L_Fe  | L_Zn-L_Fe  | UoN   | UoN  |       | 2016  | Grain     | Grain  |       | 2016       |            | 32.29938747    | 27.94149198    |
| L_Zn-L_Fe  | L_Zn-L_Fe  | Rres  |      | Rres  | 2016  | Grain     | Grain  |       | 2016       |            | 24.64443832    | 22.41583377    |
| L_Zn-L_Fe  | L_Zn-L_Fe  | Rres  |      | Rres  | 2016  | Grain     | Grain  |       | 2016       |            | 25.68955948    | 27.79200971    |
| L_Zn-L_Fe  | L_Zn-L_Fe  | UoN   | UoN  |       | 2016  | Grain     | Grain  |       | 2016       |            | 27.20373157    | 23.46492484    |
| L_Zn-L_Fe  | L_Zn-L_Fe  | Rres  |      | Rres  | 2016  | Grain     | Grain  |       | 2016       |            | 21.12827131    | 31.74933483    |
| L_Zn-L_Fe  | L_Zn-L_Fe  | UoN   | UoN  |       | 2016  | Grain     | Grain  |       | 2016       |            | 22.46301686    | 20.97923365    |
| L_Zn-L_Fe  | L_Zn-L_Fe  | UoN   | UoN  |       | 2016  | Grain     | Grain  |       | 2016       |            | 32.06948482    | 21.44134261    |









|           |     |      |      |      |      |      |             |             |
|-----------|-----|------|------|------|------|------|-------------|-------------|
| L_Zn-L_Fe | Res | 2017 | Endo | Endo | 2016 | 2017 | 32.08460269 | 28.22305068 |
| L_Zn-L_Fe | Res | 2017 | Endo | Endo | 2016 | 2017 | 34.13814742 | 25.50909861 |
| L_Zn-L_Fe | Res | 2017 | Endo | Endo | 2016 | 2017 | 41.97029387 | 27.93451671 |
| L_Zn-L_Fe | Res | 2017 | Endo | Endo | 2016 | 2017 | 33.91916986 | 44.64234667 |
| L_Zn-L_Fe | Res | 2017 | Endo | Endo | 2016 | 2017 | 35.67666641 | 23.02870461 |
| L_Zn-L_Fe | Res | 2017 | Endo | Endo | 2016 | 2017 | 33.63213477 | 28.08600497 |
| L_Zn-L_Fe | Res | 2017 | Endo | Endo | 2016 | 2017 | 32.78871128 | 28.03828919 |
| L_Zn-L_Fe | Res | 2017 | Endo | Endo | 2016 | 2017 | 34.03422446 | 32.33524224 |
| L_Zn-L_Fe | Res | 2017 | Endo | Endo | 2016 | 2017 | 36.42826738 | 28.80351312 |
| L_Zn-L_Fe | Res | 2017 | Endo | Endo | 2016 | 2017 | 30.84383293 | 24.16213607 |
| L_Zn-L_Fe | Res | 2017 | Endo | Endo | 2016 | 2017 | 27.00089197 | 31.79845529 |
| L_Zn-L_Fe | Res | 2017 | Endo | Endo | 2016 | 2017 | 28.7424174  | 28.9936322  |
| L_Zn-L_Fe | Res | 2017 | Endo | Endo | 2016 | 2017 | 34.98020846 | 24.65186142 |
| L_Zn-L_Fe | Res | 2017 | Endo | Endo | 2016 | 2017 | 30.74019963 | 33.21926904 |
| L_Zn-L_Fe | Res | 2017 | Endo | Endo | 2016 | 2017 | 32.71767186 | 40.74513414 |
| L_Zn-L_Fe | Res | 2017 | Endo | Endo | 2016 | 2017 | 29.72495566 | 30.51868412 |
| L_Zn-L_Fe | Res | 2017 | Endo | Endo | 2016 | 2017 | 29.71783565 | 40.5861331  |
| L_Zn-L_Fe | Res | 2017 | Endo | Endo | 2016 | 2017 | 27.28379021 | 23.7866808  |
| L_Zn-L_Fe | Res | 2017 | Endo | Endo | 2016 | 2017 | 37.73128162 | 33.10536945 |



| L_Zn-H_Fe |       | L_Zn-H_Fe |       | 2017 |      | 2017        |             |
|-----------|-------|-----------|-------|------|------|-------------|-------------|
| Rres      | Endo  | Endo      | Endo  | 2016 | 2017 | 2016        | 2017        |
| Rres      | Endo  | Endo      | Endo  | 2016 | 2017 | 25.84113829 | 37.57799347 |
| Rres      | Endo  | Endo      | Endo  | 2016 | 2016 | 26.29923104 | 22.51965675 |
| Rres      | Grain | Grain     | Grain | 2016 | 2016 | 24.55963283 | 39.81864457 |
| Uon       | Grain | Grain     | Grain | 2016 | 2016 | 27.8983113  | 38.0579565  |
| Rres      | Grain | Grain     | Grain | 2016 | 2016 | 26.62409137 | 34.76247408 |
| Uon       | Grain | Grain     | Grain | 2016 | 2016 | 41.32127341 | 52.42744366 |
| Uon       | Grain | Grain     | Grain | 2016 | 2016 | 26.05968284 | 27.60640241 |
| Uon       | Grain | Grain     | Grain | 2016 | 2016 | 30.25958004 | 38.38385169 |
| Rres      | Grain | Grain     | Grain | 2016 | 2016 | 21.38032982 | 37.52398015 |
| Rres      | Grain | Grain     | Grain | 2016 | 2016 | 27.88172225 | 43.23305844 |
| Rres      | Grain | Grain     | Grain | 2016 | 2016 | 24.6344677  | 38.17690432 |
| Rres      | Grain | Grain     | Grain | 2016 | 2016 | 24.95913088 | 30.96771019 |
| Uon       | Grain | Grain     | Grain | 2016 | 2016 | 25.30930009 | 38.10240387 |
| Rres      | Grain | Grain     | Grain | 2016 | 2016 | 31.23323036 | 39.08229754 |
| Rres      | Grain | Grain     | Grain | 2016 | 2016 | 26.20239252 | 23.35698759 |
| Uon       | Grain | Grain     | Grain | 2016 | 2016 | 27.1336884  | 32.92972359 |
| Uon       | Grain | Grain     | Grain | 2016 | 2016 | 32.86476577 | 34.74039917 |
| Uon       | Grain | Grain     | Grain | 2016 | 2016 | 36.59008779 | 43.16811582 |
| Rres      | Grain | Grain     | Grain | 2016 | 2016 | 27.11834384 | 38.3022376  |
| Rres      | Grain | Grain     | Grain | 2016 | 2016 | 26.01336917 | 40.29513114 |
| Uon       | Grain | Grain     | Grain | 2016 | 2016 | 27.58970575 | 42.23585281 |
| Rres      | Grain | Grain     | Grain | 2016 | 2016 | 30.45321884 | 36.35255219 |
| Uon       | Grain | Grain     | Grain | 2016 | 2016 | 25.7334148  | 32.48343651 |
| Uon       | Grain | Grain     | Grain | 2016 | 2016 | 30.9825871  | 24.41986135 |
| Uon       | Grain | Grain     | Grain | 2016 | 2016 | 44.66847598 | 34.41475637 |
| Rres      | Grain | Grain     | Grain | 2016 | 2016 | 27.92277498 | 46.46762583 |
| Rres      | Grain | Grain     | Grain | 2016 | 2016 | 29.49734488 | 46.09654774 |
| Uon       | Grain | Grain     | Grain | 2016 | 2016 | 25.42385732 | 21.19172106 |
| Rres      | Grain | Grain     | Grain | 2016 | 2016 | 37.21171516 | 48.58414795 |
| Rres      | Grain | Grain     | Grain | 2016 | 2016 | 22.92387603 | 39.35932354 |



|      |     |      |       |       |      |      |             |             |
|------|-----|------|-------|-------|------|------|-------------|-------------|
| UON  | UON | 2016 | Endo  | Endo  | 2016 |      |             |             |
| Rres |     | Rres | Endo  | Endo  | 2016 |      |             |             |
| Rres |     | Rres | Endo  | Endo  | 2016 |      |             |             |
| Rres |     | Rres | Endo  | Endo  | 2016 |      |             |             |
| Rres |     | Rres | Endo  | Endo  | 2016 |      |             |             |
| Rres |     | Rres | Endo  | Endo  | 2016 |      |             |             |
| Rres |     | Rres | Endo  | Endo  | 2016 |      |             |             |
| UON  | UON | 2016 | Endo  | Endo  | 2016 |      |             |             |
| UON  | UON | 2016 | Endo  | Endo  | 2016 |      |             |             |
| UON  | UON | 2017 | Grain | Grain |      | 2017 | 33.73487116 | 29.64745613 |
| UON  | UON | 2017 | Grain | Grain |      | 2017 | 33.17642043 | 21.16932725 |
| UON  | UON | 2017 | Grain | Grain |      | 2017 | 34.34132504 | 23.48886267 |
| UON  | UON | 2017 | Grain | Grain |      | 2017 | 41.0897638  | 29.99860912 |
| UON  | UON | 2017 | Grain | Grain |      | 2017 | 33.58171624 | 23.79084193 |
| UON  | UON | 2017 | Grain | Grain |      | 2017 | 34.71502254 | 18.88778065 |
| UON  | UON | 2017 | Grain | Grain |      | 2017 | 38.42442154 | 24.02061496 |
| UON  | UON | 2017 | Grain | Grain |      | 2017 | 39.81695851 | 25.34268113 |
| UON  | UON | 2017 | Grain | Grain |      | 2017 | 32.79024859 | 25.75589478 |
| UON  | UON | 2017 | Grain | Grain |      | 2017 | 31.6767245  | 20.56576045 |
| UON  | UON | 2017 | Grain | Grain |      | 2017 | 36.37311591 | 23.60354348 |
| UON  | UON | 2017 | Grain | Grain |      | 2017 | 33.24781746 | 30.33717216 |
| UON  | UON | 2017 | Grain | Grain |      | 2017 | 39.60489736 | 25.74237198 |
| UON  | UON | 2017 | Grain | Grain |      | 2017 | 37.97616585 | 24.5916331  |
| UON  | UON | 2017 | Grain | Grain |      | 2017 | 29.95098214 | 21.24352221 |
| UON  | UON | 2017 | Grain | Grain |      | 2017 | 33.16202163 | 26.52460513 |
| UON  | UON | 2017 | Grain | Grain |      | 2017 | 33.60666083 | 29.17759188 |
| UON  | UON | 2017 | Grain | Grain |      | 2017 | 34.83426559 | 22.4392036  |
| Rres |     | Rres | Grain | Grain |      | 2017 | 40.56124029 | 35.02342518 |
| Rres |     | Rres | Grain | Grain |      | 2017 | 38.8896309  | 35.1532042  |
| Rres |     | Rres | Grain | Grain |      | 2017 | 51.43920322 | 49.00016066 |
| Rres |     | Rres | Grain | Grain |      | 2017 | 46.7728925  | 55.59784742 |
| Rres |     | Rres | Grain | Grain |      | 2017 | 52.74156456 | 52.37690601 |
| Rres |     | Rres | Grain | Grain |      | 2017 | 53.35675317 | 52.38916027 |
| Rres |     | Rres | Grain | Grain |      | 2017 | 43.9371665  | 44.18362759 |





|      |      |      |      |       |       |      |             |             |
|------|------|------|------|-------|-------|------|-------------|-------------|
| Rres | Rres | Rres | 2017 | Endo  | Endo  | 2017 | 37.33784202 | 41.45905292 |
| Rres | Rres | Rres | 2017 | Endo  | Endo  | 2017 | 32.96919521 | 40.54319284 |
| Rres | Rres | Rres | 2017 | Endo  | Endo  | 2017 | 30.36522289 | 32.23564072 |
| Rres | Rres | Rres | 2017 | Endo  | Endo  | 2017 | 33.82310262 | 40.1472331  |
| Rres | Rres | Rres | 2017 | Endo  | Endo  | 2017 | 33.29999049 | 42.67260412 |
| Rres | Rres | Rres | 2017 | Endo  | Endo  | 2017 | 39.30910423 | 42.03152807 |
| Rres | Rres | Rres | 2017 | Endo  | Endo  | 2017 | 37.39661012 | 30.97041122 |
| Uon  | Uon  | Rres | 2016 | Grain | Grain | 2016 | 37.22027105 | 42.22066881 |
| Rres | Rres | Rres | 2016 | Grain | Grain | 2016 | 32.41633231 | 38.18360967 |
| Rres | Rres | Rres | 2016 | Grain | Grain | 2016 | 27.78398618 | 36.45807493 |
| Rres | Rres | Rres | 2016 | Grain | Grain | 2016 | 27.37496546 | 34.89491411 |
| Uon  | Uon  | Rres | 2016 | Grain | Grain | 2016 | 45.65535779 | 30.25274658 |
| Rres | Rres | Rres | 2016 | Grain | Grain | 2016 | 36.94717065 | 56.88488118 |
| Uon  | Uon  | Rres | 2016 | Grain | Grain | 2016 | 43.16135877 | 37.23686034 |
| Rres | Rres | Rres | 2016 | Grain | Grain | 2016 | 43.13737847 | 43.68343958 |
| Rres | Rres | Rres | 2016 | Grain | Grain | 2016 | 37.7158799  | 40.78876395 |
| Uon  | Uon  | Rres | 2016 | Grain | Grain | 2016 | 37.14871695 | 35.86342225 |
| Rres | Rres | Rres | 2016 | Grain | Grain | 2016 | 31.95059131 | 43.08533873 |
| Uon  | Uon  | Rres | 2016 | Grain | Grain | 2016 | 37.96222384 | 36.42643117 |









Fe\_mg\_kg\_Endo Zn\_mg\_kg\_Endo

|             |             |
|-------------|-------------|
| 21.16488245 | 11.25884388 |
| 12.10141449 | 9.832373121 |
| 15.72439615 | 9.806831067 |
| 22.83751776 | 9.038350456 |
| 22.78428752 | 9.729011578 |
| 11.1783285  | 7.367286905 |
| 21.55736094 | 10.7017942  |
| 26.07078648 | 10.3892241  |
| 20.0879467  | 12.02881462 |
| 27.39916053 | 13.41223825 |
| 16.2946181  | 8.641459632 |
| 24.46522911 | 9.282429699 |
| 27.22284994 | 11.89107471 |
| 9.731362144 | 8.558681258 |
| 13.20186766 | 9.797557507 |
| 30.80148839 | 6.761374849 |
| 19.37841484 | 9.605263527 |
| 11.68698963 | 9.449316376 |
| 23.62460343 | 7.07869843  |
| 10.62733525 | 10.58506112 |
| 28.02964484 | 8.948329233 |
| 16.12206819 | 10.49305769 |
| 7.747854828 | 8.001439231 |
| 14.37163935 | 9.475495024 |
| 13.31491125 | 9.923109559 |
| 6.762017861 | 6.891887961 |



|             |             |
|-------------|-------------|
| 12.73747349 | 10.75066825 |
| 19.04206741 | 9.209121889 |
| 15.87587949 | 8.878726819 |
| 14.49365728 | 11.45649925 |
| 9.052209183 | 8.285766351 |
| 13.12365059 | 7.545536738 |
| 7.189140018 | 7.235534167 |
| 10.69652526 | 12.62726452 |

|             |             |
|-------------|-------------|
| 12.11604347 | 5.719726009 |
| 11.61814284 | 7.587039982 |
| 11.30954816 | 4.995041156 |
| 9.915528776 | 5.035135557 |
| 9.12606285  | 4.676886859 |
| 9.058319292 | 5.634945585 |
| 10.12190567 | 6.09920413  |
| 11.00147297 | 7.960180387 |
| 11.51102184 | 5.970226435 |
| 11.39308196 | 5.120325591 |
| 10.3338478  | 6.389730041 |
| 8.136174391 | 7.156997065 |
| 7.95938211  | 6.686372469 |
| 15.03456681 | 7.28451979  |
| 13.79523851 | 9.358251881 |
| 5.353371848 | 4.411371479 |
| 8.724101633 | 4.90160387  |
| 9.231081907 | 5.009059144 |
| 11.07419802 | 8.678441488 |
| 11.64902657 | 17.22840813 |
| 11.8199795  | 13.63529262 |
| 10.79556327 | 13.72367117 |

|             |             |
|-------------|-------------|
| 11.50655066 | 11.42835904 |
| 11.84815485 | 11.65778901 |
| 9.387359016 | 11.24126073 |
| 9.974494682 | 9.986360339 |
| 10.71681572 | 15.20297294 |
| 9.465391871 | 11.37472291 |
| 9.179063998 | 12.39526304 |
| 8.710867097 | 7.539515479 |
| 11.72081613 | 13.79970874 |
| 10.24137439 | 9.912597416 |
| 7.871687202 | 7.427920209 |
| 10.06408421 | 11.50887137 |
| 9.903209929 | 11.96157861 |
| 11.73192879 | 13.94765936 |

|             |             |
|-------------|-------------|
| 15.27834907 | 8.030236356 |
| 12.40971589 | 8.309257143 |
| 19.91882462 | 10.87242402 |
| 14.92546501 | 13.25951355 |
| 25.64641848 | 10.21706911 |
| 24.20243744 | 11.8250155  |
| 8.956070746 | 7.707927319 |
| 25.77223143 | 12.75184913 |
| 20.95541214 | 9.532846914 |
| 21.69537154 | 9.18281208  |
| 9.167151054 | 9.510794993 |
| 6.720697309 | 7.578493573 |
| 15.22327083 | 10.06142033 |
| 6.984165617 | 8.587024239 |
| 7.398745127 | 12.00669721 |
| 7.975201009 | 8.79503009  |
| 6.635747206 | 11.24200444 |
| 11.6592459  | 8.359552028 |
| 18.39539981 | 14.458367   |
| 18.26393144 | 12.6050477  |
| 9.027503359 | 7.695607266 |

|             |             |
|-------------|-------------|
| 10.3719767  | 5.600450532 |
| 9.746164432 | 5.776265404 |
| 6.705081477 | 4.511327681 |
| 9.98134751  | 11.51780792 |

9.29088152  
8.536125111

10.66686925  
11.38883537

|              |             |
|--------------|-------------|
| 22.003022225 | 14.20330781 |
| 22.18197201  | 10.15651537 |
| 13.25905171  | 11.09626242 |
| 30.86259865  | 13.21984399 |
| 17.83602922  | 16.54381695 |
| 18.19421732  | 11.51164848 |
| 25.48774294  | 18.41459704 |
| 14.55600059  | 11.97740289 |
| 18.85014306  | 19.27290444 |
| 10.11847983  | 12.64853841 |
| 16.83356535  | 9.498006439 |
| 12.02751654  | 13.58861276 |
| 19.71005431  | 14.38439706 |
| 12.96627477  | 8.017359856 |
| 14.88713668  | 13.0607271  |
| 15.3517117   | 12.41925437 |
| 19.47626023  | 13.57133172 |
| 13.38031993  | 14.26216874 |
| 15.35289301  | 15.8496733  |
| 12.72034777  | 13.13765058 |
| 17.85949464  | 16.94861426 |
| 16.15411365  | 11.09324711 |
| 13.37138665  | 11.22271135 |
| 27.28684814  | 13.96600285 |
| 13.33462164  | 16.34080119 |
| 10.13124709  | 13.33226765 |

|             |             |
|-------------|-------------|
| 14.54446612 | 6.41839088  |
| 14.62164445 | 14.59292668 |
| 12.01899974 | 14.83305624 |
| 9.090691245 | 13.91985594 |
| 14.70497135 | 15.37216849 |
| 12.74498198 | 9.229959096 |

|             |             |
|-------------|-------------|
| 8.663842038 | 8.369659472 |
| 8.124405103 | 6.915173518 |
| 15.14158693 | 9.558078065 |
| 15.08006396 | 10.41923828 |
| 13.73708232 | 8.820668074 |
| 10.65629362 | 7.152873994 |
| 11.01815714 | 8.764506985 |
| 14.66955001 | 8.85864469  |
| 9.679312363 | 6.357262901 |
| 8.820656514 | 6.947174128 |
| 13.80233842 | 10.08717188 |
|             | 12.09652852 |
| 16.63718579 | 10.39755557 |
| 18.02978949 | 10.6540638  |
| 9.585454601 | 7.45213782  |
| 12.19179135 | 9.606176755 |
| 17.26124616 | 11.9393723  |
| 9.701511674 | 7.717953816 |
| 10.4278507  | 11.3744598  |
| 8.313915799 | 11.14767001 |
| 11.15765755 | 14.51024545 |
| 11.03691255 | 16.20461902 |



|             |             |
|-------------|-------------|
| 9.086813629 | 14.30373571 |
| 12.41446938 | 16.28800366 |
| 13.10157131 | 14.38543954 |
| 16.44777017 | 19.55403279 |
| 8.865803904 | 12.50190415 |
| 11.03312187 | 14.45433445 |
| 14.82568068 | 18.62425947 |
| 9.571132185 | 10.53631781 |
| 9.268775702 | 12.28285759 |
| 11.51837808 | 17.91246645 |
| 10.98468635 | 15.31815674 |
| 12.63122198 | 17.36820158 |
| 11.57411835 | 15.35189807 |
| 7.214248315 | 9.387403098 |

|             |             |
|-------------|-------------|
| 17.33609981 | 11.60619047 |
| 12.99402934 | 11.84221487 |
| 15.64168844 | 11.79944394 |
| 18.34774902 | 12.68838441 |
|             | 13.7035112  |
| 17.6264843  | 13.72875201 |
| 34.12697206 | 15.09887333 |
| 21.36476791 | 14.37952292 |
| 13.83959362 | 13.10526915 |
| 17.41273896 | 15.11646265 |
| 15.26108488 | 10.61655591 |
| 28.10580725 | 11.76395422 |
|             |             |
| 17.76970592 | 14.9236168  |
| 31.21902197 | 13.50645664 |
| 13.55760972 | 11.73843539 |

|             |             |
|-------------|-------------|
| 9.04731907  | 9.266902498 |
| 12.50145592 | 11.95552337 |
| 14.5475188  | 14.99641299 |
| 15.35241804 | 13.55189965 |
| 14.76769213 | 14.2066521  |
| 14.09207274 | 17.14474119 |
| 11.15557124 | 13.93286174 |
| 10.90619139 | 10.14222203 |
| 14.86804098 | 11.81243037 |
| 18.93001178 | 13.93260921 |
| 10.35920513 | 11.8110017  |
| 14.90723367 | 16.82945722 |
| 11.91255913 | 10.58067139 |
| 10.77050819 | 8.991073117 |
| 18.70145553 | 12.07388017 |
| 16.58986192 | 13.04856494 |
| 14.85957285 | 13.07528349 |
| 7.725453763 | 12.19726228 |
| 19.39430713 | 11.99773902 |
| 14.97264973 | 11.46834672 |

|             |             |
|-------------|-------------|
| 12.37947758 | 8.907129668 |
| 13.17999337 | 7.446588919 |
| 10.0072258  | 8.481945033 |
| 12.79726987 | 8.899039159 |
| 10.60599602 | 9.048551571 |
| 13.61155885 | 8.384263283 |
| 13.74142207 | 8.062566962 |
| 9.659835236 | 7.062775088 |
| 13.39781328 | 14.71723536 |
| 12.4365132  | 8.08757844  |

|             |             |
|-------------|-------------|
| 10.00383792 | 6.790086416 |
| 12.18403226 | 7.765981603 |
| 15.19548    | 7.755896423 |
| 12.85995526 | 7.297994013 |
| 8.390891661 | 6.655896416 |
| 7.943630649 | 8.105895594 |
| 11.38896539 | 10.36070615 |
| 7.38455258  | 6.409665828 |
| 8.772928721 | 14.55586651 |
| 9.558762865 | 14.70650207 |
| 8.419588766 | 9.026334059 |
| 11.16066359 | 13.5487767  |
| 9.363299929 | 12.48286202 |
| 13.5392506  | 13.34059427 |
| 10.25178027 | 11.70109376 |
| 11.77199002 | 14.4677604  |
| 10.95282164 | 14.2328239  |
| 10.06197166 | 10.90845769 |
| 14.20514515 | 12.53942675 |
| 8.71161753  | 10.44185019 |
| 12.04501733 | 12.93044964 |
| 8.774165126 | 11.56785763 |
| 11.55490723 | 12.6227369  |
| 10.26837555 | 14.02589726 |
| 9.947425115 | 14.80183089 |
| 9.916192636 | 15.16381983 |
